# Supplementary material for: lncRNA MALAT1 mediates osteogenic differentiation of bone mesenchymal stem cells by sponging miR-129-5p
Source: PeerJ journal article supplement (doi:10.7717/peerj.13355), 2022-04-22

A

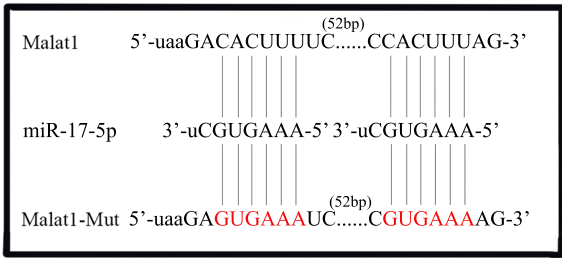

B

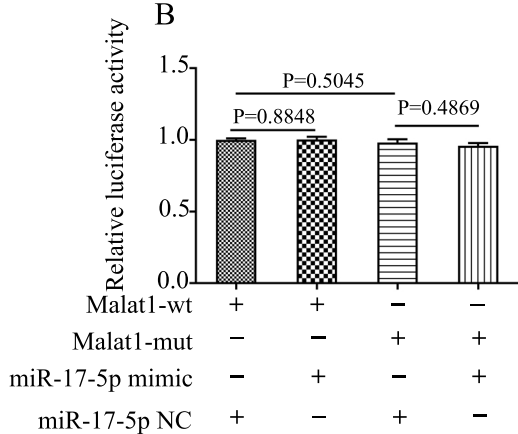

Supplement: Additional_file_6.pdf [file Additional_file_6.pdf]
