# Supplementary material for: lncRNA MALAT1 mediates osteogenic differentiation of bone mesenchymal stem cells by sponging miR-129-5p
Source: PeerJ. 2022 Apr 22;10:e13355. doi: 10.7717/peerj.13355 (PMC9037136; doi:10.7717/peerj.13355)
Supplement: Supplemental Information 1 [file peerj-10-13355-s001.xls]

## Sheet: Sheet1
Additional file 1. Data banks/repositories corresponding to all datasets analyzed in this study
Dataset	Full name	Direct web link
BiNGO	Biological Networks Gene Ontology	www.psb.ugent.be/cbd/papers/BiNGO/
Bioconductor	Bioconductor	http://www.bioconductor.org/
Cytoscape	Cytoscape	www.cytoscape.org/
GENCODE	GENCODE	https://www.gencodegenes.org/
GENCODE annotation	GENCODE annotation	ftp://ftp.ebi.ac.uk/pub/databases/gencode/Gencode_human/release_34/gencode.v34.annotation.gtf.gz
GEO	Gene Expression Omnibus database	https://www.ncbi.nlm.nih.gov/geo/
GEO dataset	series matrix files of GSE35955	https://ftp.ncbi.nlm.nih.gov/geo/series/GSE35nnn/GSE35955/matrix/
GSE35955	details of GSE35955	https://www.ncbi.nlm.nih.gov/geo/query/acc.cgi?acc=GSE35955
GPL570	GPL570 [HG-U133_Plus_2] Affymetrix Human Genome U133 Plus 2.0 Array	https://www.ncbi.nlm.nih.gov/geo/query/acc.cgi?acc=GPL570
miRcode	miRcode	http://www.mircode.org/
miRcode dataset	miRcode dataset	http://www.mircode.org/mircode_highconsfamilies.txt.gz
miRDB	miRDB	http://mirdb.org/index.html
miRDB dataset	miRDB dataset	http://mirdb.org/download/miRDB_v6.0_prediction_result.txt.gz
miRTarBase	miRTarBase	http://mirtarbase.mbc.nctu.edu.tw/php/index.php
miRTarBase dataset	miRTarBase dataset	http://mirtarbase.mbc.nctu.edu.tw/cache/download/7.0/miRTarBase_MTI.xlsx
R statistical language	R statistical language	https://www.r-project.org/
TargetScan	TargetScan	http://www.targetscan.org/vert_72/
TargetScan dataset	TargetScan dataset	http://www.targetscan.org/vert_72/vert_72_data_download/Conserved_Family_Info.txt.zip
