# Supplementary material for: lncRNA MALAT1 mediates osteogenic differentiation of bone mesenchymal stem cells by sponging miR-129-5p
Source: PeerJ. 2022 Apr 22;10:e13355. doi: 10.7717/peerj.13355 (PMC9037136; doi:10.7717/peerj.13355)
Supplement: Supplemental Information 2 [file peerj-10-13355-s002.xlsx]

## Sheet: Sheet1
Additional file 2. All differentially expressed genes identified between young and old donors
Gene	logFC	AveExpr	T	P.Value	Adj.P.Val	B	Biotype
KCNQ1-AS1	1.72884	4.47379	27.2306	5.6937e-10	1.3908e-06	13.3597	lncRNA
CECR3	1.3436	3.95309	24.2671	1.58915e-09	2.33565e-06	12.4853	lncRNA
LDLRAD4-AS1	1.29876	4.42568	22.0771	3.68155e-09	4.141e-06	11.7373	lncRNA
AP000462	-1.51916	4.16136	-21.0063	5.72003e-09	5.30969e-06	11.3345	lncRNA
C1QTNF1-AS1	-1.50642	4.03888	-19.6702	1.0228e-08	6.81942e-06	10.7933	lncRNA
FAM223B	-1.87792	4.58959	-18.9984	1.38989e-08	7.39728e-06	10.5034	lncRNA
LINC01271	-1.05596	4.24349	-18.806	1.52041e-08	7.44873e-06	10.418	lncRNA
MYLK-AS1	-1.32801	5.70465	-17.9361	2.3071e-08	8.96436e-06	10.0183	lncRNA
LHFPL3-AS2	-1.23636	4.74322	-17.7775	2.49457e-08	8.97892e-06	9.94286	lncRNA
AC008753	1.53542	4.48587	17.2655	3.22458e-08	9.02729e-06	9.69393	lncRNA
LBX1-AS1	1.16337	4.24803	16.7475	4.21226e-08	1.07051e-05	9.43301	lncRNA
LINC00656	1.52405	4.81999	16.3748	5.1299e-08	1.17501e-05	9.23944	lncRNA
AP001462	1.03673	3.91517	16.1388	5.82465e-08	1.2669e-05	9.11421	lncRNA
LINC01398	1.04682	3.45697	15.5642	7.9943e-08	1.4577e-05	8.80042	lncRNA
LINC00269	-1.00938	5.08977	-15.3794	8.87208e-08	1.46936e-05	8.6967	lncRNA
USP2-AS1	-1.82687	3.95565	-15.3427	9.05872e-08	1.46936e-05	8.67594	lncRNA
DSCR10	1.13797	4.69141	15.0913	1.04607e-07	1.57688e-05	8.53224	lncRNA
SLFNL1-AS1	1.48734	3.91607	14.6724	1.33628e-07	1.75343e-05	8.28674	lncRNA
SRD5A3-AS1	1.12032	3.68914	14.3982	1.57411e-07	1.92796e-05	8.12185	lncRNA
LINC01208	-1.81328	4.88557	-14.1798	1.79727e-07	2.10764e-05	7.98802	lncRNA
DIRC3	-1.20227	4.65998	-13.6642	2.47639e-07	2.62791e-05	7.66313	lncRNA
LINC01442	1.05395	3.30565	13.1076	3.54479e-07	3.22241e-05	7.2975	lncRNA
LINC01343	-1.2169	4.47133	-12.6709	4.74354e-07	3.82017e-05	6.99904	lncRNA
AC008088	1.06099	4.11955	11.9038	8.09359e-07	4.99114e-05	6.44839	lncRNA
FGF13-AS1	1.09135	3.47027	11.6928	9.42542e-07	5.46264e-05	6.29068	lncRNA
RUSC1-AS1	1.10866	4.42168	11.6498	9.72559e-07	5.53438e-05	6.25819	lncRNA
LINC01136	1.02284	4.66339	11.5501	1.04632e-06	5.7489e-05	6.18237	lncRNA
ITPKB-IT1	1.17363	5.2762	11.3903	1.17771e-06	6.16361e-05	6.05955	lncRNA
LINC00208	1.08944	4.16149	11.3475	1.21592e-06	6.27157e-05	6.02638	lncRNA
LINC00930	-1.12603	5.06598	-11.1333	1.429e-06	6.92398e-05	5.85839	lncRNA
AC106801	-1.157	5.57236	-11.0242	1.55308e-06	7.30446e-05	5.77165	lncRNA
LINC00868	-1.35291	5.93445	-10.9629	1.62802e-06	7.43347e-05	5.72253	lncRNA
C22orf24	-1.07085	4.58936	-10.709	1.98381e-06	8.35045e-05	5.51622	lncRNA
TDRG1	-1.32938	5.45519	-10.6962	2.00379e-06	8.38807e-05	5.50575	lncRNA
LINC01082	-1.07315	4.20256	-10.5855	2.18704e-06	8.82674e-05	5.41427	lncRNA
JPX	2.08091	5.66246	10.2106	2.95933e-06	0.000109192	5.09755	lncRNA
ERVH-1	-1.02978	7.22123	-10.0613	3.34712e-06	0.000118547	4.96833	lncRNA
LINC01023	1.15841	4.70012	9.77566	4.25447e-06	0.000137429	4.71624	lncRNA
KCNIP2-AS1	-1.11706	5.94183	-9.75264	4.33862e-06	0.000138875	4.69564	lncRNA
LINC01029	-1.15573	3.48519	-9.39031	5.9366e-06	0.000169698	4.36532	lncRNA
C7orf69	1.22447	4.00772	9.17336	7.19765e-06	0.00019205	4.16205	lncRNA
AL022341	1.04526	5.44891	9.0938	7.73176e-06	0.000199949	4.08644	lncRNA
AC073321	1.03642	4.88458	9.0636	7.94581e-06	0.000203989	4.05759	lncRNA
PSMG3-AS1	1.00573	5.72018	8.62775	1.18846e-05	0.00026873	3.63166	lncRNA
LINC00970	-1.01728	3.93374	-8.35015	1.54919e-05	0.000322765	3.35072	lncRNA
LINC00327	-1.15792	4.16801	-8.12243	1.93565e-05	0.000374331	3.11441	lncRNA
MGC16275	-1.56529	4.68941	-7.72343	2.89415e-05	0.000494882	2.68703	lncRNA
COX10-AS1	1.14256	4.85723	7.68055	3.02488e-05	0.000509438	2.64005	lncRNA
AP000347	1.11909	3.72455	7.40772	4.0245e-05	0.00061035	2.3363	lncRNA
NUTM2A-AS1	1.43821	4.7836	7.31929	4.42216e-05	0.000648553	2.23601	lncRNA
NR2F1-AS1	1.15143	5.72525	7.21732	4.93497e-05	0.000696863	2.1192	lncRNA
AC010145	-1.26277	3.80506	-7.21559	4.9442e-05	0.000697206	2.11721	lncRNA
RRN3P2	-1.12511	3.4888	-6.98896	6.33592e-05	0.000821666	1.85307	lncRNA
LINC00857	-1.05264	5.19232	-6.5001	0.000110389	0.00119371	1.26149	lncRNA
AC005306	-1.02433	5.35318	-5.8504	0.000241667	0.00208018	0.426609	lncRNA
LINC00520	-1.11621	7.92871	-5.83281	0.000247038	0.00211608	0.403199	lncRNA
NPTN-IT1	2.41367	5.32416	5.6074	0.000328612	0.00258047	0.0994102	lncRNA
LINC01139	1.55872	5.80681	5.39465	0.000432935	0.0031217	-0.193906	lncRNA
MALAT1	1.13046	8.57825	5.04952	0.000686359	0.00429266	-0.683478	lncRNA
LINC01268	2.22511	5.68203	4.1785	0.00237044	0.0105774	-1.99356	lncRNA
AC017002	1.0279	4.92673	3.61824	0.00556772	0.0201055	-2.88694	lncRNA
C20orf197	1.38649	3.40447	3.56144	0.00608502	0.0215901	-2.97929	lncRNA
TSIX	1.45075	4.64947	3.31048	0.00905095	0.0290134	-3.39021	lncRNA
SERTAD4-AS1	1.16872	6.28664	2.9068	0.0173643	0.0478522	-4.0571	lncRNA
KCNG2	-2.77905	4.68249	-35.6254	5.14978e-11	9.08266e-07	15.2074	mRNA
CD5L	-1.70849	4.16782	-30.5383	2.04532e-10	1.35144e-06	14.1835	mRNA
C11orf88	1.74804	3.80148	29.2227	3.03155e-10	1.35144e-06	13.8729	mRNA
AQP8	1.57226	4.19655	29.1868	3.06502e-10	1.35144e-06	13.8642	mRNA
ASB12	-3.10337	4.95915	-27.925	4.54801e-10	1.3908e-06	13.5448	mRNA
YBX2	1.90073	5.83009	27.4238	5.34563e-10	1.3908e-06	13.412	mRNA
PCDH19	1.87616	4.63549	26.9193	6.30858e-10	1.3908e-06	13.2745	mRNA
SIRPD	-1.47199	4.69693	-26.3973	7.51208e-10	1.47212e-06	13.1282	mRNA
LAIR2	-1.98323	4.40609	-25.9539	8.73628e-10	1.54082e-06	13.0006	mRNA
KLK5	1.59558	3.93633	24.7657	1.32607e-09	2.12617e-06	12.6428	mRNA
DRD5	-1.20722	4.34369	-22.7941	2.7724e-09	3.76129e-06	11.9928	mRNA
EMD	1.45973	7.61476	22.1945	3.51241e-09	4.141e-06	11.7799	mRNA
WDFY4	-1.41735	3.98316	-22.0269	3.75664e-09	4.141e-06	11.719	mRNA
AC012531	-1.84517	4.95694	-21.4963	4.66327e-09	4.76799e-06	11.5221	mRNA
TAF1L	-2.25294	4.55464	-21.3932	4.86612e-09	4.76799e-06	11.4831	mRNA
VAMP2	-1.51181	6.0832	-20.692	6.53645e-09	5.76417e-06	11.2112	mRNA
CAPN12	-2.21045	5.14766	-20.4492	7.25622e-09	6.09419e-06	11.1143	mRNA
KCNK4	1.41723	4.52015	20.2789	7.81324e-09	6.17114e-06	11.0455	mRNA
TCL1A	-1.41304	4.85939	-20.2112	8.04763e-09	6.17114e-06	11.0179	mRNA
TBX21	-1.80643	4.6248	-19.8073	9.61946e-09	6.81942e-06	10.8509	mRNA
MOGAT2	1.53395	4.38371	19.7772	9.7496e-09	6.81942e-06	10.8383	mRNA
BTNL8	-2.02109	4.2485	-19.5597	1.07496e-08	6.81942e-06	10.7465	mRNA
PPP3R1	2.55706	7.19478	19.544	1.08263e-08	6.81942e-06	10.7398	mRNA
IRF3	-1.82464	7.10008	-19.4281	1.14098e-08	6.88093e-06	10.6902	mRNA
LENEP	-1.46243	4.63918	-19.3721	1.17043e-08	6.88093e-06	10.6662	mRNA
ERVMER34-1	-1.05822	3.1831	-19.1432	1.29989e-08	7.20219e-06	10.5669	mRNA
GRHL2	1.30621	3.60129	19.1318	1.30674e-08	7.20219e-06	10.5619	mRNA
SHD	-1.59416	4.3073	-18.9124	1.44665e-08	7.39728e-06	10.4653	mRNA
SLCO4A1	-1.35104	4.4616	-18.881	1.46796e-08	7.39728e-06	10.4514	mRNA
SERPINA10	1.64906	4.53302	18.6716	1.61965e-08	7.72047e-06	10.3577	mRNA
RPL3L	-1.31775	4.33398	-18.398	1.84452e-08	8.10693e-06	10.2334	mRNA
CCR4	1.33141	4.75167	18.3979	1.84465e-08	8.10693e-06	10.2333	mRNA
SPAG11A	-1.18187	4.62672	-18.3959	1.84643e-08	8.10693e-06	10.2324	mRNA
VWA3A	-1.27646	5.5939	-18.3532	1.88458e-08	8.10693e-06	10.2128	mRNA
PDPK1	1.13711	4.48508	18.1697	2.05888e-08	8.64583e-06	10.1279	mRNA
TXNDC11	-1.51426	7.31367	-18.0879	2.14224e-08	8.78667e-06	10.0897	mRNA
RALYL	-1.1266	3.10937	-17.9886	2.24856e-08	8.96436e-06	10.0431	mRNA
KCNN1	-1.73969	6.09876	-17.8657	2.38828e-08	8.96436e-06	9.98491	mRNA
TBC1D28	1.53328	3.65662	17.8393	2.4196e-08	8.96436e-06	9.97233	mRNA
INSL6	1.28353	3.7815	17.8225	2.4397e-08	8.96436e-06	9.96435	mRNA
S100A14	1.29876	4.68072	17.7269	2.55789e-08	9.0227e-06	9.91862	mRNA
CC2D2B	-1.92668	4.8915	-17.6396	2.67123e-08	9.02729e-06	9.87667	mRNA
IL25	1.25855	5.0337	17.5677	2.7689e-08	9.02729e-06	9.84188	mRNA
PGLYRP2	1.67357	4.13505	17.5521	2.79051e-08	9.02729e-06	9.83435	mRNA
CCDC116	-1.32807	5.19127	-17.5357	2.8136e-08	9.02729e-06	9.82636	mRNA
HLA-DQB2	-1.68654	4.85605	-17.4805	2.89266e-08	9.02729e-06	9.79948	mRNA
PPP2R1A	-1.75642	8.58324	-17.4305	2.9663e-08	9.02729e-06	9.77508	mRNA
RAB3IL1	-1.08766	6.66976	-17.4137	2.99145e-08	9.02729e-06	9.76688	mRNA
GH1	-1.07483	4.20756	-17.405	3.00468e-08	9.02729e-06	9.76259	mRNA
PRAF2	-1.64458	9.05407	-17.3649	3.06613e-08	9.02729e-06	9.74292	mRNA
TNF	-1.1882	4.51478	-17.3406	3.10405e-08	9.02729e-06	9.73098	mRNA
SLC51B	-1.08116	3.86172	-17.3005	3.16781e-08	9.02729e-06	9.71121	mRNA
PLA2G2D	-1.57002	4.64931	-17.2797	3.20142e-08	9.02729e-06	9.70094	mRNA
ZNF280A	-1.03375	3.17846	-17.2194	3.30129e-08	9.09765e-06	9.67104	mRNA
FAM155B	-1.51242	5.26994	-17.0564	3.58856e-08	9.58961e-06	9.58971	mRNA
VAV1	-1.21554	4.17677	-16.9022	3.88604e-08	1.02296e-05	9.51191	mRNA
CIZ1	-1.624	6.55395	-16.7625	4.17938e-08	1.07051e-05	9.44069	mRNA
FOXH1	1.00951	4.53929	16.7187	4.27627e-08	1.07051e-05	9.41823	mRNA
KIF21B	-1.3105	4.26037	-16.7039	4.30949e-08	1.07051e-05	9.41065	mRNA
FLOT2	-1.28865	6.73506	-16.6716	4.38319e-08	1.07101e-05	9.39402	mRNA
ADAM32	-1.88267	4.24222	-16.6354	4.46753e-08	1.07101e-05	9.37532	mRNA
KCNA4	-1.43481	3.96895	-16.6243	4.49367e-08	1.07101e-05	9.3696	mRNA
C4orf17	1.36325	4.78754	16.5676	4.63014e-08	1.08882e-05	9.34023	mRNA
CYP4F12	-1.56213	5.12482	-16.4535	4.91916e-08	1.14157e-05	9.28072	mRNA
BIN2	-1.64132	4.99954	-16.323	5.27422e-08	1.19258e-05	9.21212	mRNA
TBL1Y	1.06613	4.343	16.1631	5.74833e-08	1.2669e-05	9.12723	mRNA
CD1C	-1.58897	5.48093	-16.1554	5.77252e-08	1.2669e-05	9.12308	mRNA
SPRR2B	-1.3059	4.93621	-16.081	6.01019e-08	1.27713e-05	9.08323	mRNA
SEMA3G	-1.01144	3.85807	-16.0569	6.08954e-08	1.27829e-05	9.07027	mRNA
CPN2	-1.13627	3.21635	-15.9943	6.30103e-08	1.29222e-05	9.03651	mRNA
OCA2	-1.06946	4.84036	-15.9243	6.54717e-08	1.32727e-05	8.99858	mRNA
NEUROD6	-1.41863	4.25783	-15.8416	6.852e-08	1.37328e-05	8.9535	mRNA
IL1RAPL2	-1.97827	4.44945	-15.7435	7.234e-08	1.41437e-05	8.8997	mRNA
DMKN	1.08395	4.50442	15.708	7.37779e-08	1.41437e-05	8.88017	mRNA
ZCWPW1	-1.3884	6.24771	-15.646	7.63681e-08	1.44828e-05	8.8459	mRNA
PLA2G3	1.28074	4.95543	15.6122	7.78246e-08	1.4577e-05	8.82712	mRNA
SBNO2	-1.42834	6.46107	-15.5202	8.19428e-08	1.4577e-05	8.77584	mRNA
ADRA1B	-1.2411	3.77152	-15.4985	8.29468e-08	1.4577e-05	8.76372	mRNA
LCE3D	-1.2352	4.4312	-15.4854	8.35629e-08	1.4577e-05	8.75636	mRNA
CCL25	-1.23214	3.83147	-15.4697	8.43031e-08	1.4577e-05	8.74758	mRNA
CRYGN	-1.3064	4.17617	-15.4263	8.63937e-08	1.46936e-05	8.72318	mRNA
TNS4	-1.0772	5.72698	-15.3914	8.81165e-08	1.46936e-05	8.70351	mRNA
UNC79	-1.31803	4.34908	-15.3372	9.0872e-08	1.46936e-05	8.67281	mRNA
PRM2	-1.24391	4.20643	-15.3285	9.13235e-08	1.46936e-05	8.66787	mRNA
NKX2-5	1.79807	5.60431	15.3223	9.16426e-08	1.46936e-05	8.66439	mRNA
ZNF850	1.68909	4.14934	15.2976	9.29397e-08	1.47674e-05	8.65037	mRNA
CD180	1.11744	5.55823	15.2759	9.40961e-08	1.48176e-05	8.63803	mRNA
INSM2	-1.15729	4.2141	-15.2434	9.58607e-08	1.49619e-05	8.61948	mRNA
PRB4	-1.21686	5.12779	-15.1671	1.00145e-07	1.54935e-05	8.57581	mRNA
AIPL1	1.0236	4.21851	15.1173	1.03053e-07	1.56685e-05	8.5472	mRNA
NPHS1	-1.12449	4.36053	-15.0148	1.0934e-07	1.60411e-05	8.48795	mRNA
KRT36	1.04601	3.82783	15.0036	1.10052e-07	1.60411e-05	8.48146	mRNA
HPCA	1.00985	5.56518	14.9432	1.13987e-07	1.63234e-05	8.44627	mRNA
CLEC3A	-1.13914	3.6878	-14.9317	1.14752e-07	1.63234e-05	8.43957	mRNA
ZNF155	-1.20337	4.89631	-14.8911	1.17504e-07	1.63234e-05	8.41581	mRNA
ZBED5	-1.06674	6.95279	-14.8572	1.19851e-07	1.65142e-05	8.39598	mRNA
POLR3E	1.09972	4.40287	14.7545	1.27305e-07	1.71396e-05	8.33543	mRNA
LHX3	-1.44154	4.49325	-14.6932	1.31998e-07	1.75343e-05	8.29907	mRNA
ZNF425	-1.07041	4.17548	-14.6622	1.34438e-07	1.75343e-05	8.28066	mRNA
MYOZ1	-2.00516	4.9901	-14.6621	1.34446e-07	1.75343e-05	8.2806	mRNA
IVL	-1.28775	4.01496	-14.6526	1.35208e-07	1.75343e-05	8.27492	mRNA
FGF8	1.24938	4.12277	14.6325	1.36831e-07	1.76152e-05	8.26293	mRNA
HCRTR2	-1.46789	3.59641	-14.5633	1.42585e-07	1.80918e-05	8.22149	mRNA
MYO1G	-1.0054	4.66228	-14.483	1.49596e-07	1.88361e-05	8.17317	mRNA
DNMT3L	1.27766	4.05446	14.4671	1.51027e-07	1.88361e-05	8.16357	mRNA
KAAG1	-1.18023	3.77497	-14.4602	1.51654e-07	1.88361e-05	8.1594	mRNA
KCNE2	1.14535	4.74361	14.4155	1.55786e-07	1.92139e-05	8.13231	mRNA
ZNF628	-1.36106	5.65833	-14.2789	1.69196e-07	2.04391e-05	8.04901	mRNA
PNPLA2	-1.37584	8.02332	-14.2393	1.73319e-07	2.05156e-05	8.0247	mRNA
LGALS4	1.43814	4.22988	14.1732	1.80447e-07	2.10764e-05	7.98398	mRNA
NBPF4	1.95124	4.14909	14.1529	1.82711e-07	2.12005e-05	7.97137	mRNA
SLC6A9	-1.51942	4.0753	-14.1379	1.84388e-07	2.12553e-05	7.96213	mRNA
2021-09-03	1.39753	5.19573	14.0899	1.8991e-07	2.16302e-05	7.93229	mRNA
NCSTN	-1.39595	6.01481	-13.9304	2.09578e-07	2.34017e-05	7.8325	mRNA
SLC52A3	1.0549	5.37441	13.9214	2.10755e-07	2.34017e-05	7.82683	mRNA
PLD6	1.01319	4.91938	13.9132	2.11834e-07	2.34017e-05	7.82165	mRNA
WNT9A	1.03177	4.09655	13.9097	2.12296e-07	2.34017e-05	7.81944	mRNA
RGSL1	-1.11811	4.15332	-13.8678	2.17909e-07	2.38712e-05	7.79298	mRNA
LCN12	-1.02949	3.77475	-13.8103	2.25882e-07	2.45918e-05	7.75653	mRNA
APOBEC3D	-1.34385	4.43119	-13.7548	2.33882e-07	2.51523e-05	7.7212	mRNA
LRSAM1	-1.23085	5.38534	-13.6566	2.4883e-07	2.62791e-05	7.65826	mRNA
CSN3	-1.1619	3.21043	-13.6339	2.52425e-07	2.65002e-05	7.64368	mRNA
ALG12	-1.11988	6.17016	-13.504	2.7419e-07	2.76782e-05	7.55953	mRNA
LRRC56	1.06724	5.54916	13.5015	2.74632e-07	2.76782e-05	7.55789	mRNA
IL16	-1.37601	4.7457	-13.4533	2.83232e-07	2.80766e-05	7.52649	mRNA
TRAPPC1	-2.41967	8.54888	-13.4526	2.83361e-07	2.80766e-05	7.52602	mRNA
CCDC178	1.55449	4.1323	13.4043	2.92296e-07	2.88001e-05	7.49439	mRNA
CCDC114	1.77362	4.14779	13.3881	2.95364e-07	2.89407e-05	7.48375	mRNA
PSKH2	1.20981	4.25313	13.3721	2.98418e-07	2.90784e-05	7.47326	mRNA
TIFAB	1.16932	4.82958	13.3324	3.06179e-07	2.91896e-05	7.44708	mRNA
CACNG3	-1.53636	4.25522	-13.194	3.3499e-07	3.09192e-05	7.35529	mRNA
TCP10	-1.36829	4.56613	-13.1867	3.36593e-07	3.09192e-05	7.35041	mRNA
PYDC1	-1.25622	3.80393	-13.0596	3.65863e-07	3.25895e-05	7.26518	mRNA
EI24	1.28647	8.7697	12.9453	3.94613e-07	3.39502e-05	7.18776	mRNA
HAMP	-1.08756	4.4562	-12.9095	4.04118e-07	3.4432e-05	7.16339	mRNA
BMP15	1.26629	3.5272	12.8879	4.09975e-07	3.47631e-05	7.14865	mRNA
GIPC1	-1.08925	8.18441	-12.8239	4.27902e-07	3.57902e-05	7.10478	mRNA
EPHX1	-2.76709	8.01896	-12.8229	4.28176e-07	3.57902e-05	7.10413	mRNA
FAM131C	1.00673	5.41726	12.787	4.38612e-07	3.6365e-05	7.07943	mRNA
ZNF785	1.33194	4.5587	12.7783	4.41176e-07	3.6365e-05	7.07345	mRNA
USF1	1.33368	5.60143	12.7671	4.44538e-07	3.64666e-05	7.06567	mRNA
FBXO46	1.21916	7.01734	12.689	4.68563e-07	3.82017e-05	7.01165	mRNA
SYT4	1.03021	3.52435	12.6709	4.74348e-07	3.82017e-05	6.99905	mRNA
RPL38	1.05875	10.0689	12.5918	5.00545e-07	3.97663e-05	6.94384	mRNA
TUBGCP6	1.05219	5.57411	12.5834	5.03409e-07	3.98145e-05	6.93797	mRNA
HIGD1B	1.22726	5.12106	12.5585	5.12018e-07	4.03146e-05	6.92054	mRNA
AP2M1	-1.44635	10.6635	-12.546	5.1643e-07	4.04812e-05	6.91172	mRNA
CYB5R3	-1.16864	10.4976	-12.5243	5.24154e-07	4.07498e-05	6.89646	mRNA
SEC61A1	-1.21379	9.74865	-12.4943	5.35038e-07	4.12025e-05	6.87532	mRNA
UBA1	-1.07528	7.16012	-12.4868	5.3777e-07	4.12025e-05	6.87009	mRNA
BMP3	-1.34301	3.93268	-12.4759	5.41821e-07	4.12025e-05	6.86236	mRNA
PABPC3	1.13342	12.0784	12.4704	5.43889e-07	4.12025e-05	6.85845	mRNA
SPATA16	-1.02548	4.92099	-12.4692	5.44321e-07	4.12025e-05	6.85763	mRNA
MAPKAPK2	-1.32618	6.71188	-12.4579	5.48583e-07	4.13477e-05	6.8496	mRNA
NUTM1	-1.28629	5.74936	-12.4461	5.53025e-07	4.15051e-05	6.84131	mRNA
CORT	-1.12336	5.15941	-12.4304	5.59037e-07	4.17786e-05	6.83018	mRNA
HMGCS2	-1.12487	4.20776	-12.4105	5.66783e-07	4.21787e-05	6.81602	mRNA
ZNF205	1.47617	6.1304	12.3982	5.71613e-07	4.21994e-05	6.80728	mRNA
TMEM128	1.4012	8.64044	12.3584	5.8756e-07	4.28215e-05	6.77895	mRNA
CASQ2	1.09698	4.28476	12.3127	6.06507e-07	4.28548e-05	6.74625	mRNA
PRAP1	-1.31679	4.70717	-12.3066	6.09095e-07	4.28548e-05	6.74186	mRNA
GPR50	-1.19076	3.62493	-12.3034	6.10452e-07	4.28548e-05	6.73957	mRNA
C1orf105	-1.0206	4.14414	-12.2968	6.13254e-07	4.28548e-05	6.73485	mRNA
KLHDC3	-1.16163	7.99192	-12.2743	6.22923e-07	4.32402e-05	6.71873	mRNA
TTYH1	-1.11809	3.85438	-12.1145	6.96782e-07	4.63742e-05	6.60315	mRNA
PATE2	-1.10085	4.22219	-12.0721	7.17968e-07	4.72493e-05	6.57222	mRNA
CBX3	1.34405	7.73319	12.0417	7.33603e-07	4.80987e-05	6.54997	mRNA
GHRH	-1.09239	4.1782	-12.0306	7.39377e-07	4.82558e-05	6.54187	mRNA
ELSPBP1	-1.11911	4.79956	-12.0155	7.47344e-07	4.84592e-05	6.5308	mRNA
XAGE2	-1.31252	4.78096	-11.9792	7.66927e-07	4.88529e-05	6.50407	mRNA
ZNF304	1.05575	6.57322	11.9786	7.67265e-07	4.88529e-05	6.50362	mRNA
CLPTM1	-1.22024	7.92029	-11.9401	7.8862e-07	4.95558e-05	6.47524	mRNA
ZNF317	-1.30074	6.07531	-11.9399	7.88729e-07	4.95558e-05	6.47509	mRNA
ZNF490	1.23755	6.06188	11.9361	7.90848e-07	4.95558e-05	6.47232	mRNA
BFSP1	-1.15983	4.34782	-11.9251	7.97091e-07	4.96759e-05	6.46419	mRNA
OPLAH	1.78795	5.51067	11.9065	8.07801e-07	4.99114e-05	6.45039	mRNA
CD19	-1.0336	4.44629	-11.8967	8.13459e-07	4.99895e-05	6.44317	mRNA
CACNA1F	-1.10235	4.89962	-11.8584	8.3617e-07	5.03936e-05	6.41468	mRNA
CEBPE	-1.00923	5.19951	-11.8432	8.45344e-07	5.03936e-05	6.40339	mRNA
CTSZ	2.06572	7.92272	11.8415	8.46368e-07	5.03936e-05	6.40214	mRNA
USP10	-1.31114	7.32336	-11.8319	8.52239e-07	5.04394e-05	6.39498	mRNA
HAAO	1.24375	5.88146	11.6931	9.42334e-07	5.46264e-05	6.29091	mRNA
UCN3	-1.06401	5.46935	-11.6354	9.829e-07	5.53438e-05	6.24723	mRNA
CAMK2N2	1.01344	5.39346	11.5814	1.02254e-06	5.67126e-05	6.20622	mRNA
SLC9A3R2	-1.26891	4.35583	-11.5618	1.03739e-06	5.71956e-05	6.19127	mRNA
PCDHGC3	-1.26437	4.78917	-11.5261	1.06502e-06	5.81542e-05	6.16399	mRNA
SYT16	1.03105	3.06711	11.514	1.07456e-06	5.84938e-05	6.15474	mRNA
KRTAP4-2	-1.31052	4.10776	-11.4861	1.09689e-06	5.94126e-05	6.13339	mRNA
WDR87	1.29283	4.32967	11.4763	1.10491e-06	5.94126e-05	6.12582	mRNA
ZNF546	1.23318	3.79298	11.3992	1.16994e-06	6.14112e-05	6.06644	mRNA
RNPEPL1	1.22291	6.97562	11.3753	1.19099e-06	6.21466e-05	6.0479	mRNA
BANF1	-2.35684	9.58625	-11.348	1.21551e-06	6.27157e-05	6.02673	mRNA
PRKCSH	-1.46281	8.573	-11.3449	1.21831e-06	6.27157e-05	6.02434	mRNA
OR10C1	-1.11433	3.62541	-11.3434	1.21968e-06	6.27157e-05	6.02317	mRNA
TRIP10	-1.84272	7.27396	-11.2969	1.2629e-06	6.43748e-05	5.98697	mRNA
ZNF708	1.51932	4.33076	11.2864	1.27295e-06	6.45146e-05	5.97872	mRNA
LTA	1.2098	5.06552	11.282	1.27716e-06	6.45425e-05	5.97528	mRNA
PPP4C	-1.14408	9.39934	-11.2615	1.29702e-06	6.51724e-05	5.95924	mRNA
CDC42SE1	1.32789	6.78526	11.2568	1.30153e-06	6.52133e-05	5.95563	mRNA
ABHD8	-1.34773	6.0144	-11.2307	1.32737e-06	6.60158e-05	5.93518	mRNA
AAAS	-1.21137	7.05374	-11.2236	1.33457e-06	6.60158e-05	5.92955	mRNA
SET	1.56911	10.394	11.2233	1.33483e-06	6.60158e-05	5.92935	mRNA
CD207	-1.03223	3.81197	-11.1414	1.42026e-06	6.91573e-05	5.86478	mRNA
GPR3	-1.3672	4.45192	-11.1021	1.46332e-06	7.01094e-05	5.83368	mRNA
RNF26	-1.19624	6.9296	-11.099	1.46682e-06	7.01094e-05	5.83118	mRNA
CD8A	-1.11779	4.53082	-11.0314	1.54457e-06	7.28386e-05	5.77738	mRNA
OR2S2	-1.05883	4.26875	-11.0051	1.576e-06	7.32383e-05	5.75638	mRNA
2021-09-02	-1.00681	8.6711	-10.9982	1.58438e-06	7.33431e-05	5.75086	mRNA
RHCG	1.49482	5.19338	10.9884	1.59646e-06	7.3704e-05	5.74294	mRNA
PLA2G4D	1.07602	3.6985	10.9676	1.62216e-06	7.43347e-05	5.72629	mRNA
PRDM7	-1.05073	3.50319	-10.9605	1.63107e-06	7.43347e-05	5.72058	mRNA
CALCOCO1	-1.90501	7.43818	-10.9605	1.63109e-06	7.43347e-05	5.72056	mRNA
GNG8	-1.03234	4.14263	-10.9367	1.66124e-06	7.52698e-05	5.70146	mRNA
FAM9C	1.10308	3.35205	10.9168	1.68697e-06	7.59006e-05	5.68543	mRNA
OPTC	-1.04819	4.71481	-10.8372	1.79449e-06	7.85347e-05	5.62096	mRNA
NAPA	-2.7709	7.72417	-10.7739	1.88529e-06	8.0977e-05	5.56943	mRNA
CPSF1	-1.10255	4.67528	-10.7599	1.90614e-06	8.12217e-05	5.55794	mRNA
LCN10	1.21043	5.37064	10.7531	1.91624e-06	8.12422e-05	5.55242	mRNA
VPREB1	1.158	3.39534	10.6996	1.99853e-06	8.38807e-05	5.5085	mRNA
ITLN1	1.01983	3.56898	10.6942	2.00701e-06	8.38807e-05	5.50407	mRNA
GJA8	-1.23014	5.01533	-10.6524	2.07431e-06	8.62917e-05	5.4696	mRNA
HSP90AB1	-1.23181	11.0712	-10.6522	2.07448e-06	8.62917e-05	5.46951	mRNA
TNNI2	1.08101	4.63301	10.6312	2.10927e-06	8.71282e-05	5.45213	mRNA
DENND1C	-1.10227	4.5285	-10.605	2.1536e-06	8.79238e-05	5.43038	mRNA
ABCG4	-1.49514	5.43288	-10.5976	2.16624e-06	8.82355e-05	5.42426	mRNA
FAAH2	-1.28818	4.97864	-10.5892	2.18063e-06	8.82674e-05	5.41734	mRNA
PCDHGA3	-1.36356	4.77372	-10.5687	2.21652e-06	8.88473e-05	5.40026	mRNA
RAX	1.2906	5.81209	10.5035	2.33488e-06	9.17157e-05	5.34584	mRNA
SMIM24	-1.10661	5.22136	-10.4955	2.34984e-06	9.18938e-05	5.33916	mRNA
TAS1R2	1.11557	3.96561	10.4813	2.37675e-06	9.27406e-05	5.32724	mRNA
LRRC25	-1.72946	5.34609	-10.4324	2.47183e-06	9.52946e-05	5.28618	mRNA
NUCB1	-1.93211	8.05579	-10.4077	2.52148e-06	9.63662e-05	5.26535	mRNA
KRTAP4-12	-1.09751	3.27936	-10.3797	2.57904e-06	9.80314e-05	5.24171	mRNA
HECTD3	-1.02965	6.61203	-10.2311	2.91027e-06	0.00010806	5.11508	mRNA
CCK	1.02619	4.42113	10.2222	2.93149e-06	0.000108392	5.10746	mRNA
CPA5	-1.17475	4.89273	-10.1039	3.23092e-06	0.000116146	5.00542	mRNA
CDK5R2	1.04583	4.07123	10.0967	3.25043e-06	0.00011652	4.9991	mRNA
SHISA5	-1.40469	9.6465	-10.0732	3.31407e-06	0.00011832	4.97875	mRNA
NAT14	-1.18826	7.17391	-10.0096	3.49395e-06	0.000121765	4.92325	mRNA
MUC2	-1.22231	5.3754	-9.98303	3.57238e-06	0.000124028	4.89993	mRNA
OSCAR	1.58562	4.1481	9.93445	3.7206e-06	0.000127578	4.85722	mRNA
PDGFA	1.72793	7.51472	9.85872	3.96539e-06	0.000133214	4.79025	mRNA
CEP290	1.37345	6.14466	9.84273	4.0193e-06	0.000134258	4.77605	mRNA
STRN3	1.95352	7.22906	9.82036	4.09611e-06	0.000135795	4.75614	mRNA
C20orf173	-1.41016	4.65245	-9.79103	4.19924e-06	0.000137309	4.72999	mRNA
TBC1D32	1.58976	4.42756	9.78251	4.22974e-06	0.000137309	4.72237	mRNA
CST4	1.05277	5.5634	9.77096	4.27149e-06	0.000137726	4.71204	mRNA
KHDC3L	1.05111	4.37752	9.72454	4.44384e-06	0.000140964	4.67042	mRNA
TEX13B	1.00977	4.77466	9.71955	4.46283e-06	0.000141312	4.66594	mRNA
AKR1B10	-1.5824	4.3921	-9.68931	4.57978e-06	0.000143981	4.63871	mRNA
SLC7A3	1.00315	4.15058	9.64382	4.76211e-06	0.000148654	4.59761	mRNA
FBXO17	1.38705	7.01988	9.62114	4.85601e-06	0.000150697	4.57705	mRNA
PTGR1	-1.09273	8.61824	-9.56153	5.1126e-06	0.000157092	4.52282	mRNA
GTF2I	-2.23376	5.85857	-9.47362	5.51871e-06	0.000164137	4.44227	mRNA
ANTXR2	-1.24781	7.29314	-9.45359	5.61616e-06	0.000165704	4.42382	mRNA
NFS1	-1.05559	6.50771	-9.45314	5.61836e-06	0.000165704	4.42341	mRNA
BRINP2	-1.01871	3.73945	-9.44102	5.67825e-06	0.000166802	4.41223	mRNA
IL17RB	-1.15385	4.49516	-9.40748	5.8477e-06	0.000168849	4.38123	mRNA
CLDN7	-1.02629	5.00392	-9.40714	5.84945e-06	0.000168849	4.38091	mRNA
LMAN1	-1.93706	8.60251	-9.39088	5.9336e-06	0.000169698	4.36585	mRNA
TAGLN3	-1.28562	5.15623	-9.39087	5.93364e-06	0.000169698	4.36584	mRNA
SCAF1	-1.16981	5.38036	-9.26684	6.62136e-06	0.000181902	4.25015	mRNA
RAB11B	-1.24167	5.03215	-9.23797	6.7937e-06	0.000184141	4.22303	mRNA
ATP6V1A	-1.09855	9.34959	-9.23086	6.83691e-06	0.00018466	4.21634	mRNA
GLYATL2	-1.19919	4.54755	-9.18851	7.10059e-06	0.000190904	4.17638	mRNA
RDH8	-1.27833	5.40413	-9.18319	7.13454e-06	0.000191234	4.17135	mRNA
CLINT1	-1.10932	7.3885	-9.1428	7.39783e-06	0.000194449	4.13308	mRNA
ARL15	1.40381	5.79202	9.13447	7.45344e-06	0.000195039	4.12517	mRNA
ERI3	-1.57248	7.10166	-9.09686	7.71042e-06	0.000199949	4.08936	mRNA
PCGF1	-1.43918	6.9181	-9.0617	7.95944e-06	0.000204042	4.05578	mRNA
GKN2	-1.168	3.70966	-9.03707	8.13917e-06	0.000207743	4.03218	mRNA
BCL9L	-1.27202	6.82235	-8.97964	8.57588e-06	0.000216208	3.97694	mRNA
TECTB	-1.17805	5.46839	-8.95913	8.73804e-06	0.0002186	3.95713	mRNA
ARHGAP32	1.72663	5.27738	8.95518	8.76964e-06	0.000218894	3.95332	mRNA
REC114	-1.17532	5.11545	-8.9461	8.84273e-06	0.000219352	3.94454	mRNA
MBNL2	-1.09338	6.00927	-8.93814	8.90746e-06	0.000220338	3.93683	mRNA
CLEC1A	-1.00556	3.82902	-8.8959	9.25948e-06	0.00022619	3.89584	mRNA
ERLIN1	-1.03744	8.6693	-8.79371	1.01761e-05	0.000240583	3.79598	mRNA
C16orf58	-1.0549	6.12718	-8.78688	1.02408e-05	0.000241144	3.78927	mRNA
MAP4K2	-1.01789	5.27847	-8.77799	1.03257e-05	0.000242497	3.78053	mRNA
PIRT	-1.22231	4.82322	-8.77092	1.03939e-05	0.000243772	3.77357	mRNA
HSF2	-1.04927	6.31298	-8.74382	1.06594e-05	0.000249007	3.74687	mRNA
QPCTL	1.06188	4.91935	8.70625	1.10402e-05	0.000256251	3.70971	mRNA
PRPF39	1.3355	7.29766	8.70605	1.10422e-05	0.000256251	3.70952	mRNA
ABR	-1.06517	7.85529	-8.69632	1.11432e-05	0.000256773	3.69988	mRNA
FGF17	-1.02055	4.75067	-8.65565	1.15766e-05	0.000264477	3.65948	mRNA
C1orf109	1.33414	7.13247	8.61735	1.20018e-05	0.000270685	3.62127	mRNA
HIPK1	-1.27861	5.9333	-8.60258	1.21703e-05	0.000273088	3.60651	mRNA
ZNF345	1.05901	4.77701	8.56374	1.2626e-05	0.000280814	3.56756	mRNA
SPPL2C	1.00909	4.73665	8.55992	1.26718e-05	0.000281476	3.56373	mRNA
TXNDC16	1.10641	6.55176	8.5483	1.28123e-05	0.000283527	3.55204	mRNA
SLC25A39	-1.00838	7.83662	-8.54082	1.29037e-05	0.000284478	3.54451	mRNA
LINGO1	1.22255	4.07854	8.53865	1.29303e-05	0.000284709	3.54233	mRNA
CREB3L1	-1.28313	7.62806	-8.53044	1.30316e-05	0.000286121	3.53406	mRNA
CAPNS1	-1.23376	11.0489	-8.52523	1.30963e-05	0.000286932	3.52881	mRNA
SMIM22	1.01137	4.08804	8.51547	1.32186e-05	0.000288892	3.51896	mRNA
STX5	-1.45411	6.60287	-8.49314	1.3503e-05	0.000293197	3.4964	mRNA
MLF2	-1.75528	9.05298	-8.49075	1.35339e-05	0.000293197	3.49398	mRNA
GSTM4	-1.3114	5.92759	-8.45158	1.40505e-05	0.000300939	3.45427	mRNA
TULP4	1.42644	6.13001	8.37003	1.5197e-05	0.000319082	3.37111	mRNA
EP300	1.19129	7.02032	8.34857	1.55155e-05	0.000322765	3.34911	mRNA
PXDN	1.90229	10.4466	8.31363	1.60499e-05	0.000330305	3.31319	mRNA
NR3C2	1.25831	3.8259	8.28064	1.65732e-05	0.000338321	3.27916	mRNA
PLTP	-1.07494	6.46483	-8.26905	1.67614e-05	0.00034097	3.26718	mRNA
PLEC	-1.25221	7.78165	-8.19395	1.80393e-05	0.000358692	3.18921	mRNA
PRKG2	-1.13707	3.84228	-8.17679	1.83462e-05	0.000362748	3.17131	mRNA
CTNNB1	1.80284	8.2326	8.13793	1.90624e-05	0.000370267	3.13066	mRNA
STX16	-1.29181	7.47345	-8.1149	1.95012e-05	0.000375894	3.1065	mRNA
RAB33B	1.35519	6.40549	8.11162	1.95646e-05	0.000376405	3.10305	mRNA
IFT88	1.01528	7.41764	8.10893	1.96168e-05	0.000376885	3.10022	mRNA
FAM86C1	-1.54339	5.07586	-8.10338	1.97247e-05	0.000378136	3.0944	mRNA
CDK17	-1.2216	7.03537	-8.08532	2.00811e-05	0.000383669	3.07538	mRNA
TRHDE	1.09014	3.19792	8.066	2.04702e-05	0.000386959	3.05501	mRNA
CA11	-1.48445	5.01889	-8.06347	2.05217e-05	0.000387104	3.05234	mRNA
AXL	1.29848	9.04619	8.03145	2.11868e-05	0.00039542	3.01847	mRNA
PGLS	1.12487	7.23553	8.01595	2.15171e-05	0.000399287	3.00204	mRNA
INPP5A	-1.71838	7.11761	-8.01423	2.15542e-05	0.000399319	3.00021	mRNA
SUPT16H	-1.29961	8.23649	-7.98524	2.21885e-05	0.000408069	2.9694	mRNA
SIRT1	1.02531	7.8462	7.93673	2.32962e-05	0.00042117	2.91765	mRNA
NAP1L2	1.12697	2.87637	7.93183	2.34114e-05	0.00042117	2.91241	mRNA
RDH16	-1.00343	4.93896	-7.93019	2.34501e-05	0.00042117	2.91066	mRNA
RAB8A	-1.42621	9.2087	-7.91143	2.3898e-05	0.00042704	2.89055	mRNA
TLCD2	1.66346	5.8954	7.90064	2.41598e-05	0.000431281	2.87898	mRNA
FABP2	-1.01269	4.52031	-7.81217	2.64289e-05	0.000462903	2.78358	mRNA
DARS	1.40612	9.75727	7.79631	2.68597e-05	0.00046841	2.76639	mRNA
FAM163A	1.05026	3.72661	7.77842	2.73553e-05	0.0004744	2.74696	mRNA
DGKA	-1.50843	6.81298	-7.76787	2.7652e-05	0.000478016	2.73549	mRNA
RNF151	1.0522	5.30398	7.76716	2.7672e-05	0.000478016	2.73472	mRNA
MAZ	-1.9879	7.03332	-7.72747	2.88217e-05	0.000494483	2.69144	mRNA
CTTN	1.09479	6.55901	7.69295	2.98643e-05	0.000506159	2.65366	mRNA
KCTD18	1.00401	7.35306	7.69259	2.98753e-05	0.000506159	2.65327	mRNA
YJEFN3	-1.20113	5.1951	-7.6867	3.00573e-05	0.000508266	2.64681	mRNA
CCRL2	-1.22338	4.20829	-7.67613	3.03871e-05	0.00051052	2.63521	mRNA
APPL2	-1.67028	7.99271	-7.653	3.11227e-05	0.000516866	2.60977	mRNA
DDIT4L	-2.00686	5.19213	-7.6318	3.1814e-05	0.000525113	2.5864	mRNA
XXYLT1	1.47312	7.27346	7.62344	3.20912e-05	0.000525526	2.57718	mRNA
ZNF793	1.15749	4.90033	7.58335	3.34578e-05	0.000538584	2.53282	mRNA
JDP2	1.2403	6.58208	7.52069	3.57236e-05	0.000565378	2.46311	mRNA
CMTM8	1.11304	4.92663	7.51062	3.61031e-05	0.000569544	2.45187	mRNA
PARP14	-1.22774	5.70755	-7.44447	3.87089e-05	0.000596252	2.37772	mRNA
ASCL5	1.00524	4.23877	7.42565	3.94871e-05	0.000603916	2.35653	mRNA
SORBS3	-1.2247	7.0904	-7.42019	3.97163e-05	0.000605949	2.35037	mRNA
F13A1	1.26684	3.94712	7.34134	4.31912e-05	0.000641755	2.2611	mRNA
BACH2	1.75262	4.60311	7.31792	4.42868e-05	0.000648553	2.23444	mRNA
ISLR	-1.42701	7.63639	-7.30066	4.51132e-05	0.000658422	2.21476	mRNA
DYNLRB2	1.23794	4.1104	7.28746	4.57568e-05	0.000661261	2.19968	mRNA
BSG	-1.39915	9.60299	-7.27703	4.62728e-05	0.000665684	2.18774	mRNA
CYP11B2	1.35959	5.3849	7.23431	4.84521e-05	0.000686937	2.13874	mRNA
DHX9	-1.6435	6.46932	-7.22169	4.91172e-05	0.000694692	2.12423	mRNA
ZBTB48	-1.00516	5.5103	-7.16925	5.19899e-05	0.000724075	2.0637	mRNA
AKT1S1	-1.26837	5.89374	-7.14253	5.35238e-05	0.000735521	2.03274	mRNA
CPNE1	-1.02491	8.62483	-7.11737	5.50141e-05	0.000748099	2.00349	mRNA
KIAA0232	1.06813	7.12344	7.10751	5.56103e-05	0.000753301	1.99201	mRNA
STIP1	-1.59996	8.2762	-7.05209	5.90955e-05	0.000786617	1.92727	mRNA
RNGTT	-1.15184	5.88155	-7.04767	5.93836e-05	0.00078926	1.92209	mRNA
SMAD3	-1.26869	7.71312	-7.02414	6.09431e-05	0.000801531	1.89448	mRNA
PNPLA6	-1.33561	7.19278	-6.99398	6.30079e-05	0.000819521	1.85899	mRNA
MRGBP	1.25958	6.86455	6.95475	6.58093e-05	0.000844744	1.81265	mRNA
ANKHD1	1.32077	3.28816	6.92864	6.77486e-05	0.00086273	1.78171	mRNA
TRPV2	-1.04776	6.97085	-6.92504	6.80212e-05	0.00086411	1.77743	mRNA
SUSD2	-1.23382	5.05925	-6.92202	6.82506e-05	0.000865997	1.77385	mRNA
KCNS1	-1.43393	5.80241	-6.86936	7.23887e-05	0.000897958	1.71113	mRNA
CCDC110	-1.03139	3.56466	-6.86445	7.27881e-05	0.00090152	1.70527	mRNA
MRPL47	-1.03508	7.41397	-6.83579	7.51693e-05	0.000924519	1.67098	mRNA
LZTS3	1.08006	6.77772	6.83255	7.54441e-05	0.000926607	1.66709	mRNA
IGF2R	1.02994	9.11624	6.82332	7.6232e-05	0.000933683	1.65602	mRNA
ASGR1	1.05834	4.06198	6.79914	7.83389e-05	0.000951559	1.62697	mRNA
EMP3	-1.83042	10.5655	-6.7787	8.01699e-05	0.000967139	1.60235	mRNA
ABCD3	-1.05871	8.0195	-6.77723	8.03034e-05	0.000967426	1.60058	mRNA
NONO	-1.11198	10.1225	-6.73143	8.45861e-05	0.00100162	1.54522	mRNA
DIO3	1.22832	5.43908	6.72103	8.55921e-05	0.0010079	1.53262	mRNA
SLC39A7	1.32818	8.02275	6.71582	8.61014e-05	0.00101171	1.52629	mRNA
TRIM28	-1.31344	8.78296	-6.70445	8.72246e-05	0.00101947	1.51248	mRNA
H3F3A	1.12562	5.70464	6.68948	8.87273e-05	0.00103156	1.49428	mRNA
SPIN3	1.00624	4.98149	6.68836	8.88414e-05	0.00103201	1.49291	mRNA
KLF13	1.04687	6.5129	6.68289	8.93985e-05	0.00103459	1.48625	mRNA
SACS	1.14712	9.12661	6.65253	9.25591e-05	0.00105867	1.44923	mRNA
FLI1	-1.00153	5.43526	-6.63794	9.41215e-05	0.0010685	1.43139	mRNA
LTC4S	1.06727	5.11866	6.60908	9.72979e-05	0.00109372	1.39602	mRNA
LY6E	-1.85657	9.21225	-6.5942	9.89812e-05	0.0011077	1.37774	mRNA
ANKRD12	1.17762	6.97141	6.56747	0.000102084	0.00113237	1.34484	mRNA
SOWAHC	1.26507	8.20999	6.54944	0.000104238	0.00114903	1.32259	mRNA
NXT2	-1.16905	6.65795	-6.52702	0.000106986	0.00116909	1.29486	mRNA
DRAP1	-1.70863	9.28661	-6.52464	0.000107282	0.0011716	1.29192	mRNA
C3orf70	1.50433	3.74537	6.51373	0.000108651	0.00117925	1.2784	mRNA
ARFIP2	-1.05636	8.65465	-6.5017	0.000110183	0.00119221	1.26348	mRNA
OTUD6B	1.19472	7.29625	6.49865	0.000110576	0.00119457	1.25969	mRNA
CCDC85C	-1.0748	6.66346	-6.49473	0.000111082	0.00119679	1.25482	mRNA
ETFB	-1.05021	9.31445	-6.45652	0.000116152	0.00123111	1.20726	mRNA
ZBTB41	1.34482	8.35712	6.40687	0.00012312	0.00128649	1.14517	mRNA
PLAU	-1.47495	8.80526	-6.36473	0.000129391	0.00133376	1.09223	mRNA
TMEM214	-1.32386	8.40606	-6.33463	0.000134085	0.00136687	1.05425	mRNA
TSPYL4	1.04089	9.39711	6.32601	0.000135462	0.00137623	1.04336	mRNA
DLST	1.1782	8.84445	6.31556	0.000137153	0.00138702	1.03014	mRNA
ALPK3	-1.31722	4.74663	-6.29428	0.000140668	0.00141285	1.00317	mRNA
SH3RF2	-1.11179	4.98693	-6.26384	0.000145869	0.00144858	0.964485	mRNA
MSLN	-1.03425	3.66198	-6.2361	0.000150789	0.00148491	0.92913	mRNA
BTBD2	-1.49749	6.51362	-6.21475	0.000154701	0.00151413	0.901837	mRNA
PCDHB2	1.87729	4.74042	6.20187	0.000157112	0.00153093	0.885356	mRNA
GABPA	1.00283	6.38846	6.19603	0.00015822	0.00153917	0.87787	mRNA
TTC30B	1.00582	4.48107	6.16807	0.000163641	0.00157935	0.841968	mRNA
ZDBF2	2.23312	6.00913	6.13996	0.000169295	0.00161101	0.805775	mRNA
SLC22A15	1.50674	6.2307	6.10973	0.000175616	0.0016581	0.76672	mRNA
PKM	-1.35459	8.37252	-6.08521	0.000180929	0.00169422	0.73496	mRNA
TES	1.11638	7.6245	6.08511	0.000180951	0.00169422	0.734832	mRNA
EDEM1	1.09871	8.15775	6.07406	0.000183402	0.00171146	0.720495	mRNA
CAPRIN2	-1.11081	7.31603	-5.98052	0.000205667	0.00185066	0.598423	mRNA
C1QTNF1	-1.17732	6.03266	-5.98035	0.00020571	0.00185066	0.598199	mRNA
STAT1	-1.22691	9.99975	-5.93952	0.000216338	0.00191736	0.544538	mRNA
JUND	-1.05936	6.59393	-5.91436	0.000223182	0.00195833	0.511365	mRNA
HNRNPL	1.25308	8.63719	5.90189	0.000226663	0.001981	0.494875	mRNA
EYA4	1.39442	4.80265	5.84487	0.000243342	0.0020892	0.419252	mRNA
ITIH5	2.6998	4.95167	5.82169	0.000250497	0.00213328	0.38839	mRNA
HK2	1.22194	9.23077	5.82099	0.000250717	0.00213412	0.387454	mRNA
C6orf62	1.0217	8.06474	5.80176	0.000256834	0.00216821	0.361783	mRNA
DAGLB	-1.02954	6.42635	-5.75245	0.000273271	0.00226595	0.295727	mRNA
SLC35A4	-1.02126	7.83011	-5.73567	0.000279124	0.0023015	0.273164	mRNA
MET	-1.57075	7.20991	-5.72066	0.000284474	0.0023298	0.25295	mRNA
IRF9	-1.22975	8.99814	-5.67458	0.000301601	0.00243671	0.190709	mRNA
ZYX	-1.11885	8.84757	-5.67344	0.000302041	0.00243695	0.189157	mRNA
SAMD12	-1.47386	3.63809	-5.66182	0.00030654	0.00246419	0.17342	mRNA
CCDC170	-1.03807	4.24989	-5.64085	0.000314848	0.00250747	0.144954	mRNA
JAM3	-1.25498	6.52256	-5.61768	0.000324312	0.00255466	0.113432	mRNA
UBXN11	-1.09888	5.60496	-5.60532	0.000329488	0.0025839	0.0965774	mRNA
SEC22B	-1.10748	10.5588	-5.5502	0.000353675	0.00270855	0.0211929	mRNA
GPX3	-1.80657	7.14481	-5.53858	0.000359019	0.0027447	0.00523466	mRNA
SLC4A2	-1.25297	7.24373	-5.52784	0.000364031	0.00276981	-0.00951693	mRNA
ITGA5	-1.15872	10.1502	-5.51021	0.000372429	0.00280706	-0.0337816	mRNA
SHOX	2.19849	4.8067	5.49988	0.000377444	0.00283396	-0.0480121	mRNA
DDR2	-1.06461	9.3659	-5.49844	0.00037815	0.00283544	-0.0500013	mRNA
KDM7A	1.29891	5.59282	5.49357	0.000380549	0.00284637	-0.0567271	mRNA
UBXN8	1.05198	6.7106	5.48234	0.000386134	0.0028796	-0.072228	mRNA
TGFB1I1	1.07332	10.3556	5.47335	0.000390671	0.00290728	-0.084653	mRNA
POLI	1.07927	6.4448	5.45529	0.000399957	0.00295272	-0.109642	mRNA
E2F5	1.14957	5.78302	5.42676	0.000415122	0.00302917	-0.149225	mRNA
SRSF6	1.4492	8.26723	5.37438	0.000444602	0.00317339	-0.222183	mRNA
FAHD1	1.01402	7.76607	5.36941	0.000447517	0.00318517	-0.22913	mRNA
FBXL22	1.54969	4.12202	5.367	0.000448935	0.00319269	-0.232495	mRNA
RELT	1.06387	6.30696	5.3653	0.000449943	0.00319728	-0.234879	mRNA
CHPF	-1.23242	7.84908	-5.3646	0.000450358	0.0031976	-0.235859	mRNA
FANCG	-1.49246	6.99252	-5.35933	0.000453485	0.00321339	-0.243217	mRNA
FAM162B	1.26508	4.78975	5.34312	0.00046327	0.00325749	-0.265912	mRNA
MEX3B	1.78718	5.70932	5.33614	0.000467558	0.00327852	-0.275706	mRNA
DAPK1	-1.17336	5.93543	-5.31093	0.000483388	0.00335492	-0.311101	mRNA
TRIM21	-1.11971	6.8379	-5.28829	0.000498094	0.00342091	-0.342956	mRNA
HTRA4	-1.00216	5.07031	-5.27763	0.00050519	0.00346021	-0.35799	mRNA
ZNF516	1.45576	6.44877	5.25997	0.000517183	0.00351776	-0.382923	mRNA
S1PR1	1.80015	4.83124	5.24378	0.000528448	0.00355918	-0.405821	mRNA
TTC30A	1.16472	4.95997	5.22624	0.000540955	0.00361943	-0.430675	mRNA
EGR3	1.46995	6.72441	5.21139	0.00055179	0.00366868	-0.451745	mRNA
FKBP9	1.33837	9.86535	5.19613	0.000563167	0.00372612	-0.473426	mRNA
CCDC142	1.25666	4.34	5.18147	0.00057434	0.00378113	-0.494294	mRNA
AKR1C1	-1.05899	6.72889	-5.17784	0.000577147	0.00379252	-0.499472	mRNA
CPED1	-1.25108	7.74054	-5.16054	0.00059071	0.00384784	-0.524143	mRNA
PCDHB15	1.14145	2.92909	5.14104	0.000606406	0.00391909	-0.551994	mRNA
UBE2L6	-1.16057	9.49563	-5.12858	0.000616678	0.00396802	-0.569831	mRNA
PALLD	1.11083	9.29301	5.11917	0.000624559	0.00400413	-0.583315	mRNA
CENPB	-1.31898	6.94987	-5.08543	0.000653716	0.00414435	-0.631756	mRNA
PFN1	-1.02843	11.8633	-5.083	0.000655867	0.00415389	-0.635244	mRNA
PKN1	-1.00031	7.12647	-5.07297	0.000664844	0.0041983	-0.649675	mRNA
WBP2	-1.01322	7.55428	-5.06223	0.000674607	0.00424173	-0.665149	mRNA
MKNK2	1.23536	8.53426	5.04031	0.000695013	0.00433449	-0.696775	mRNA
DLG4	1.0336	4.78597	5.00582	0.000728485	0.00449084	-0.746687	mRNA
STARD9	1.20633	4.39725	4.99046	0.000743951	0.00456385	-0.768975	mRNA
ALDH1L2	1.16436	6.66885	4.98567	0.000748839	0.00458761	-0.775923	mRNA
H2AFY2	-1.12255	7.75276	-4.96774	0.00076747	0.00467884	-0.801992	mRNA
RAB12	1.49463	7.46033	4.92622	0.000812545	0.00485792	-0.862517	mRNA
ATL1	1.29724	7.03458	4.92374	0.000815329	0.00486993	-0.866144	mRNA
JMY	1.02309	6.71623	4.90986	0.000831087	0.00493531	-0.886442	mRNA
PPP1R3C	1.96554	7.39561	4.89198	0.000851861	0.00502316	-0.912615	mRNA
CHI3L1	-2.16103	7.73532	-4.88635	0.000858521	0.00504556	-0.92087	mRNA
RANGAP1	-1.68876	7.39393	-4.88475	0.000860432	0.00505343	-0.923228	mRNA
PLAC9	1.06513	6.80936	4.87628	0.000870575	0.00510789	-0.93565	mRNA
ZNF616	1.14285	4.05246	4.83775	0.000918392	0.00532468	-0.992317	mRNA
AMIGO2	1.91238	10.5042	4.83517	0.000921697	0.00533508	-0.996123	mRNA
IRX3	1.12339	11.2027	4.78123	0.000993708	0.00562995	-1.07581	mRNA
P2RY6	-1.02142	7.18031	-4.76978	0.00100976	0.0056953	-1.09279	mRNA
PAQR7	1.11059	6.6038	4.73468	0.00106072	0.0059109	-1.14492	mRNA
ASB5	1.79293	4.70482	4.69647	0.00111936	0.0061579	-1.20187	mRNA
OAS2	-1.78965	6.00437	-4.67175	0.00115915	0.00631419	-1.23883	mRNA
CABYR	-1.17537	6.19526	-4.67034	0.00116146	0.00631854	-1.24094	mRNA
PLD3	-1.18362	8.61189	-4.65962	0.00117922	0.00640035	-1.25699	mRNA
TMEM171	-1.15528	5.8806	-4.64736	0.00119989	0.00647962	-1.27537	mRNA
OAS3	-1.54451	6.18658	-4.64622	0.00120183	0.00648616	-1.27709	mRNA
NBEA	1.19948	5.09616	4.62443	0.0012396	0.00663315	-1.30981	mRNA
VMP1	-1.29277	7.52139	-4.59554	0.00129165	0.00683287	-1.3533	mRNA
SAMHD1	-1.29616	6.73515	-4.5714	0.00133694	0.00701358	-1.38973	mRNA
ACADVL	-1.00489	9.89352	-4.53659	0.00140525	0.00727243	-1.44239	mRNA
CDCP1	-1.56447	5.6449	-4.53587	0.00140671	0.00727785	-1.44348	mRNA
TRIB3	1.53795	7.67458	4.5217	0.00143562	0.00738408	-1.46497	mRNA
KCTD15	1.02906	6.08338	4.50624	0.00146788	0.00749753	-1.48844	mRNA
TMEM150C	1.494	4.53996	4.48849	0.00150588	0.00760941	-1.51543	mRNA
TAF1D	1.2111	6.78785	4.48824	0.00150642	0.00760941	-1.51581	mRNA
NYAP1	1.24983	4.42868	4.47937	0.00152582	0.00768222	-1.52932	mRNA
NANOS1	2.19764	4.81524	4.47191	0.00154233	0.00774106	-1.54069	mRNA
PCSK5	2.64513	6.18437	4.44068	0.00161357	0.0079891	-1.58835	mRNA
EDNRA	-1.02287	5.23585	-4.44013	0.00161485	0.0079891	-1.58919	mRNA
ZNF506	1.0369	5.0675	4.4285	0.00164231	0.00808413	-1.60698	mRNA
CCPG1	1.21309	8.71528	4.42803	0.00164343	0.0080874	-1.6077	mRNA
TP53	-1.35695	5.94621	-4.42309	0.00165525	0.00812738	-1.61526	mRNA
PCDHB14	1.52201	4.27817	4.41336	0.00167878	0.00821366	-1.63015	mRNA
CHEK2	-1.00511	7.07085	-4.40986	0.00168733	0.0082422	-1.63551	mRNA
PUF60	-1.00809	9.36108	-4.40753	0.00169306	0.00825558	-1.63909	mRNA
CALR	1.10876	8.17828	4.40369	0.00170253	0.00828932	-1.64498	mRNA
FAT4	1.49331	7.2998	4.39069	0.00173503	0.0084114	-1.66492	mRNA
ANKRD36B	1.58455	6.69561	4.39002	0.00173672	0.0084173	-1.66594	mRNA
CELSR2	1.04434	5.51688	4.38705	0.00174426	0.00844455	-1.67051	mRNA
PEAR1	1.17026	7.85385	4.37741	0.00176893	0.0085242	-1.68532	mRNA
ANKRD1	3.32954	7.42778	4.33774	0.0018744	0.0088834	-1.74638	mRNA
SCARA3	-1.1298	6.63866	-4.32546	0.0019084	0.00900679	-1.76532	mRNA
PRG2	-1.12512	4.44186	-4.30798	0.00195794	0.00917192	-1.79233	mRNA
NLGN4X	1.22721	3.96725	4.28878	0.00201393	0.00935961	-1.82203	mRNA
WDSUB1	1.00903	7.37075	4.28012	0.00203975	0.00944409	-1.83545	mRNA
MN1	1.80661	8.1024	4.27846	0.00204475	0.00946295	-1.83802	mRNA
FGFRL1	-1.37597	5.98376	-4.27584	0.00205263	0.00948629	-1.84207	mRNA
SKP2	-1.01992	6.35952	-4.24868	0.00213647	0.0097898	-1.88422	mRNA
ETV1	-1.41043	5.76057	-4.247	0.00214179	0.00981163	-1.88684	mRNA
SRD5A3	1.00264	5.49107	4.24459	0.00214943	0.00983641	-1.89059	mRNA
PRDM1	-1.05181	6.42214	-4.23659	0.00217496	0.00992235	-1.90302	mRNA
SGCG	1.97144	4.57035	4.22961	0.00219753	0.0100072	-1.91388	mRNA
NYNRIN	-1.25873	6.16096	-4.22875	0.0022003	0.0100146	-1.91521	mRNA
RGS18	1.15432	3.05127	4.19912	0.00229899	0.0103279	-1.96137	mRNA
YWHAE	-1.18311	8.89892	-4.18927	0.00233284	0.0104507	-1.97674	mRNA
AMFR	1.08225	7.99095	4.1879	0.0023376	0.010464	-1.97889	mRNA
PKIA	-1.37139	6.04204	-4.17599	0.0023793	0.0106103	-1.99748	mRNA
TSPAN2	1.25415	5.49304	4.16235	0.00242806	0.0107707	-2.01881	mRNA
RASSF2	1.79986	4.92543	4.16069	0.00243409	0.0107946	-2.02142	mRNA
BNIP3L	1.03688	11.1584	4.15956	0.00243817	0.01081	-2.02318	mRNA
GSTM2	-1.02363	7.95738	-4.14856	0.00247844	0.0109226	-2.0404	mRNA
DCLK1	1.08051	5.83416	4.13677	0.00252237	0.011075	-2.05886	mRNA
PCDHB5	1.17494	4.36633	4.12142	0.00258085	0.0112753	-2.08295	mRNA
PDE4B	-1.03724	5.50599	-4.11998	0.00258642	0.0112968	-2.08521	mRNA
CYP27B1	-1.08067	4.04549	-4.11764	0.00259548	0.011314	-2.08888	mRNA
IGFBP4	-1.72373	11.899	-4.11318	0.00261283	0.0113769	-2.09589	mRNA
PLK1	-1.98153	6.20629	-4.11122	0.00262051	0.0114006	-2.09897	mRNA
AKR1C3	-1.4973	9.05282	-4.09833	0.00267154	0.0115598	-2.11923	mRNA
DACT1	2.13246	9.28734	4.09295	0.00269312	0.0116306	-2.12767	mRNA
VLDLR	2.39391	7.29618	4.09264	0.00269437	0.0116329	-2.12816	mRNA
TUBB2B	2.02841	5.00858	4.07395	0.00277094	0.0118677	-2.15758	mRNA
CRIP2	-1.30996	8.41709	-4.07115	0.0027826	0.0119118	-2.16199	mRNA
ZNF281	1.43306	9.38357	4.07016	0.00278675	0.0119238	-2.16356	mRNA
IL26	2.73124	3.75135	4.0431	0.0029024	0.0122964	-2.20623	mRNA
TPX2	-2.05645	8.5267	-4.03798	0.00292485	0.0123766	-2.21432	mRNA
CXCL6	-3.73965	8.41531	-4.03655	0.00293116	0.0123944	-2.21658	mRNA
IL1R1	-1.07333	7.74725	-4.02775	0.00297031	0.0125179	-2.2305	mRNA
KLHDC9	1.00324	5.93764	3.94353	0.00337386	0.0137894	-2.36403	mRNA
BAX	1.54392	8.08814	3.92688	0.00346029	0.0140362	-2.39052	mRNA
UNC5B	1.36827	8.39702	3.91554	0.00352056	0.0142083	-2.40859	mRNA
PSPH	1.26253	5.58389	3.90919	0.00355475	0.0143205	-2.41871	mRNA
CD83	-1.19702	5.87796	-3.89861	0.00361252	0.0145035	-2.43558	mRNA
SGK1	1.04657	9.69272	3.89692	0.00362185	0.0145344	-2.43829	mRNA
NOG	2.68123	5.63922	3.89392	0.00363844	0.014591	-2.44307	mRNA
ANXA10	-1.90098	5.02347	-3.88945	0.00366333	0.0146541	-2.4502	mRNA
UHMK1	-1.0313	7.70776	-3.88558	0.00368506	0.0147227	-2.45639	mRNA
ROR2	1.03456	3.27521	3.86871	0.0037812	0.0149957	-2.48333	mRNA
RAMP1	1.041	7.17397	3.84066	0.00394708	0.0154866	-2.52822	mRNA
ADAMTS12	-1.06778	6.6422	-3.83894	0.0039575	0.0155108	-2.53098	mRNA
NPM3	1.02654	7.10117	3.83748	0.00396638	0.0155386	-2.53332	mRNA
LDB3	1.13792	5.51504	3.8234	0.00405296	0.0158041	-2.55589	mRNA
CCL2	-1.3948	10.9119	-3.81224	0.00412295	0.0160018	-2.57378	mRNA
CNN3	1.17889	10.8707	3.79606	0.00422679	0.0163334	-2.59976	mRNA
KCNK6	1.1046	7.03589	3.77294	0.00437998	0.0168007	-2.63693	mRNA
PSMB9	-1.06583	9.11825	-3.75946	0.00447199	0.0170614	-2.65862	mRNA
DDIT4	1.95424	10.2971	3.75318	0.00451554	0.0171787	-2.66874	mRNA
NEXN	1.03184	9.3901	3.74979	0.00453924	0.0172439	-2.6742	mRNA
THBD	-1.85075	5.67841	-3.73784	0.00462383	0.0174813	-2.69346	mRNA
MSS51	1.17272	4.99333	3.73099	0.00467305	0.0176221	-2.7045	mRNA
DNM1	-1.60171	5.80621	-3.72326	0.00472925	0.0177619	-2.71697	mRNA
ISG15	-2.44121	10.3612	-3.72177	0.00474019	0.0177878	-2.71938	mRNA
NHS	1.24357	7.19436	3.70783	0.00484365	0.018103	-2.74188	mRNA
CTSK	-1.06036	9.19541	-3.70547	0.00486132	0.0181446	-2.74568	mRNA
OAS1	-2.91252	6.59856	-3.70538	0.00486202	0.0181446	-2.74583	mRNA
CDA	-1.45831	5.87606	-3.6822	0.00504003	0.0186357	-2.7833	mRNA
KNTC1	-1.27559	6.31817	-3.67935	0.00506239	0.0186946	-2.78791	mRNA
TNFSF4	1.50397	4.91875	3.66655	0.00516413	0.0189789	-2.80863	mRNA
ADAMTSL4	-1.42141	5.22057	-3.65926	0.00522298	0.0191354	-2.82043	mRNA
ITGA2	-1.51818	6.41836	-3.62865	0.00547805	0.0198451	-2.87005	mRNA
HSPB1	-1.00463	11.8216	-3.62094	0.00554436	0.0200397	-2.88257	mRNA
SMKR1	1.24868	4.25416	3.61356	0.0056086	0.0202064	-2.89455	mRNA
GGT5	-1.27918	6.00045	-3.61133	0.00562816	0.0202414	-2.89817	mRNA
SKI	1.08549	8.79407	3.59741	0.00575187	0.0206038	-2.92078	mRNA
NME7	-1.21442	8.03911	-3.58506	0.00586405	0.0209446	-2.94086	mRNA
ADRB2	-2.20211	5.07416	-3.55899	0.00610852	0.0216294	-2.98329	mRNA
FOXC1	1.28258	9.32112	3.55021	0.00619314	0.0218588	-2.99758	mRNA
IFI35	-1.34519	8.23091	-3.53913	0.00630184	0.0221538	-3.01564	mRNA
ZBTB2	1.00164	6.58201	3.52646	0.00642858	0.0224828	-3.0363	mRNA
APELA	-2.43878	4.24839	-3.52354	0.00645813	0.0225593	-3.04106	mRNA
NABP2	-1.0423	6.40946	-3.49493	0.00675554	0.0233394	-3.08776	mRNA
MAP2	-1.15291	3.83855	-3.45372	0.00720941	0.0244712	-3.15514	mRNA
MTFR2	-1.10904	4.01394	-3.45284	0.00721942	0.024491	-3.15657	mRNA
CCDC8	1.12871	6.32111	3.43667	0.00740637	0.0249239	-3.18304	mRNA
GPC4	2.10207	7.18616	3.42795	0.00750929	0.025179	-3.19732	mRNA
CDT1	-1.39829	5.72101	-3.42002	0.00760423	0.0254104	-3.21032	mRNA
CCL26	-1.03631	5.69766	-3.41327	0.00768601	0.0256157	-3.22139	mRNA
APLN	1.00662	5.92954	3.41241	0.00769653	0.025641	-3.2228	mRNA
IFIT3	-2.37055	9.03515	-3.40199	0.00782466	0.025939	-3.23988	mRNA
ZNF571	1.01414	4.37326	3.40179	0.00782714	0.025939	-3.24021	mRNA
MDK	-1.37762	8.54574	-3.3985	0.00786814	0.0260406	-3.24561	mRNA
PSMC3	-1.01737	9.59727	-3.39321	0.00793444	0.0262092	-3.25428	mRNA
EPSTI1	-1.45055	8.095	-3.39313	0.00793543	0.0262092	-3.25441	mRNA
APOLD1	-1.05327	7.72017	-3.35097	0.00848531	0.027596	-3.32363	mRNA
SLC43A3	-1.37696	7.84128	-3.35048	0.00849203	0.0276081	-3.32445	mRNA
COL14A1	1.06314	4.56418	3.34805	0.0085249	0.0276773	-3.32844	mRNA
DPP4	-1.51233	7.48334	-3.34211	0.00860584	0.02786	-3.33819	mRNA
TMEM170B	1.43267	5.09032	3.3406	0.00862663	0.0279171	-3.34068	mRNA
CRABP2	-1.30398	7.69874	-3.32715	0.00881353	0.0284124	-3.3628	mRNA
HMGA1	-1.05611	7.95638	-3.30805	0.00908605	0.0291153	-3.3942	mRNA
SECTM1	-1.13593	6.67923	-3.29499	0.00927748	0.0296264	-3.4157	mRNA
ACKR3	1.19963	6.4933	3.28716	0.00939437	0.0298915	-3.4286	mRNA
NOV	-1.74504	6.391	-3.26865	0.00967653	0.0305851	-3.45908	mRNA
ERRFI1	1.03627	10.5178	3.26283	0.00976702	0.0308269	-3.46866	mRNA
DHRS3	1.15703	8.51154	3.25584	0.009877	0.0310906	-3.48019	mRNA
HSPB6	-1.20977	6.35525	-3.25249	0.00993017	0.0312134	-3.48571	mRNA
SELENBP1	-1.01442	7.14065	-3.22101	0.0104441	0.0324873	-3.53762	mRNA
APOL3	-1.14269	5.66944	-3.2156	0.0105352	0.0327359	-3.54654	mRNA
IFI44	-1.52832	6.99488	-3.215	0.0105454	0.0327561	-3.54754	mRNA
SLC22A3	1.57542	6.10206	3.19357	0.0109146	0.0336365	-3.5829	mRNA
IL1B	-1.66794	6.76704	-3.18541	0.0110588	0.0340035	-3.59637	mRNA
ACVR2A	1.70331	8.09353	3.18347	0.0110933	0.0340919	-3.59957	mRNA
HOMER2	1.00523	4.64899	3.1612	0.0114981	0.0350245	-3.63635	mRNA
EYA2	1.47398	7.7875	3.15955	0.0115287	0.0350854	-3.63908	mRNA
SMCO4	1.16894	8.53083	3.15639	0.0115875	0.0351832	-3.6443	mRNA
FAT1	1.03582	10.7894	3.14284	0.0118431	0.0358277	-3.66667	mRNA
ENPP4	1.15995	5.70011	3.14274	0.0118451	0.0358277	-3.66684	mRNA
CXCL1	-2.57539	8.53041	-3.12855	0.0121193	0.0364696	-3.6903	mRNA
BRCA2	-1.60604	4.77995	-3.09496	0.0127947	0.0379707	-3.74582	mRNA
DNER	-2.66393	5.3707	-3.075	0.0132143	0.0389626	-3.77883	mRNA
CCDC58	1.68785	6.73157	3.07496	0.0132151	0.0389626	-3.77889	mRNA
DDX58	-1.4679	7.32499	-3.0686	0.0133517	0.0392894	-3.78941	mRNA
SYBU	1.40293	4.30439	3.06702	0.0133859	0.0393674	-3.79202	mRNA
PLK4	-1.23206	4.80855	-3.06122	0.013512	0.039613	-3.80161	mRNA
MX1	-3.29067	8.72375	-3.05969	0.0135457	0.0396919	-3.80415	mRNA
C11orf87	1.07234	5.22914	3.05704	0.0136039	0.0397633	-3.80853	mRNA
CAPG	-1.32717	8.52012	-3.04723	0.0138216	0.0402198	-3.82475	mRNA
USP18	-1.41868	6.99183	-3.04394	0.0138956	0.040395	-3.8302	mRNA
C4orf46	-1.03056	6.68029	-3.02551	0.0143169	0.0413336	-3.86069	mRNA
RUVBL1	-1.19745	8.32554	-3.01987	0.0144485	0.0416046	-3.87003	mRNA
CHAC1	1.00414	7.09606	3.00019	0.0149172	0.0426756	-3.90258	mRNA
PMEPA1	1.32026	8.2963	2.99415	0.0150642	0.0429915	-3.91258	mRNA
RAB27B	-1.18233	5.3423	-2.99294	0.0150938	0.0430619	-3.91457	mRNA
FZD3	1.14318	4.61983	2.97715	0.015486	0.0437985	-3.94071	mRNA
CDCA2	-1.31843	6.51276	-2.97446	0.0155538	0.0439478	-3.94515	mRNA
RTP4	-1.77881	5.74789	-2.96082	0.0159024	0.0447536	-3.96772	mRNA
RGS17	-1.36702	4.04175	-2.93884	0.0164816	0.0460309	-4.0041	mRNA
TUBG1	-1.12924	8.65739	-2.92672	0.0168099	0.0466895	-4.02415	mRNA
LTF	-1.28405	5.24921	-2.91974	0.0170021	0.0470985	-4.0357	mRNA
MOXD1	-1.02816	6.56262	-2.91412	0.0171583	0.0474023	-4.04498	mRNA
KIF2C	-1.53561	7.16361	-2.91353	0.0171747	0.0474272	-4.04596	mRNA
TK1	-1.12949	7.68096	-2.89608	0.0176703	0.0485437	-4.07483	mRNA
HSD17B6	1.72867	6.51219	2.8909	0.0178202	0.0488793	-4.0834	mRNA
KYNU	-1.07705	5.38144	-2.88833	0.0178951	0.0490468	-4.08766	mRNA
