# Supplementary material for: lncRNA MALAT1 mediates osteogenic differentiation of bone mesenchymal stem cells by sponging miR-129-5p
Source: PeerJ. 2022 Apr 22;10:e13355. doi: 10.7717/peerj.13355 (PMC9037136; doi:10.7717/peerj.13355)
Supplement: Supplemental Information 3 [file peerj-10-13355-s003.xlsx]

## Sheet: Sheet1
Additional file 3.Potential co-expression competing triples (lncRNA-miRNA-mRNA triples)
Node1	Node2	Node3
RRN3P2	hsa-miR-212-3p	EP300,ENPP4,KCTD15,ARHGAP32,E2F5,VMP1,LZTS3,ZNF516,ABR,CHAC1,SIRT1,MTFR2
RRN3P2	hsa-miR-4262	KIF2C,DDIT4,CAPRIN2
RRN3P2	hsa-miR-429	ERRFI1,C11orf87,NLGN4X,STX16,STAT1,CPED1,SOWAHC,NOG,DDIT4,IGF2R,C4orf46,AMFR,ZNF304,NYAP1,GABPA,FLI1,TXNDC16,KYNU,EP300,DDIT4L,TES,INSM2,KCTD15,NANOS1,FZD3,TRHDE,CDK17,PKIA,CNN3,DGKA,ARL15,PDPK1,HIPK1,TAF1D,RNGTT,MAP2
RRN3P2	hsa-miR-216b-5p	GABPA,NONO,ANXA10,EDNRA,IL25,QPCTL,SLC22A15,STX16,HK2,SAMD12,TMEM170B,SOWAHC
RRN3P2	hsa-miR-217	ZNF708,SLC4A2,UBXN11,DACT1,C11orf87,CHPF,ATP6V1A,ZNF317,ACKR3,TXNDC16,BACH2,NAP1L2,RAB11B,NEXN,SIRT1,HOMER2,TMEM170B,TAF1D,ZNF490
RRN3P2	hsa-miR-508-3p	ANXA10,TECTB,NONO,DCLK1,RGS17,RAB12,CNN3,FLOT2
RRN3P2	hsa-miR-23b-3p	TSPYL4,C6orf62,ZBTB2,NLGN4X,INPP5A,PCDH19,MET,SOWAHC,PLAU,SYT4,RALYL,STAT1,WBP2,PDE4B,ZNF793,ZDBF2,BNIP3L,SGK1,PKIA,PDPK1,ETV1,EGR3
RRN3P2	hsa-miR-24-3p	STRN3,PCDHB2,ATP6V1A,STX16,TRIB3,DARS,HECTD3,OAS2,RAB3IL1,CYP11B2,GPC4,KIF21B,ZNF708,ZNF281,USP10,USP18,RAB8A,PDPK1,ZNF490,MAPKAPK2,QPCTL,IGF2R,BNIP3L,STX5,TXNDC16,VAV1,YBX2,ZNF317,LENEP,CCDC58,NCSTN,APPL2,SUSD2,S1PR1,KLHDC3,HIPK1
RRN3P2	hsa-miR-1297	VLDLR,CHEK2,SRSF6,OTUD6B,DLG4,SERPINA10,ZNF516,CHAC1,ERLIN1,ENPP4,DDIT4,SAMD12,SKP2,RALYL,TXNDC16,PPP3R1,PALLD,CPED1,ITGA5,RHCG,DCLK1,DAPK1,TSPYL4,ZNF708,MAP2,SACS,NHS,GPC4,HMGA1,RGS17,PARP14
RRN3P2	hsa-miR-4465	SACS,CHAC1
RRN3P2	hsa-miR-27a-3p	STX16,EDNRA,ATP6V1A,TMEM170B,FBXO46,MKNK2,INSM2,RNGTT,NXT2,ITGA5,KCNA4,PDPK1,NEUROD6,PKIA,CNN3,EYA4,MET,MBNL2
RRN3P2	hsa-miR-107	FAT4,FLOT2,TRAPPC1,TK1,SOWAHC,FOXC1,ENPP4,PCSK5,FGFRL1,CD180,ITGA2,EI24,APLN,TULP4,CELSR2,CCDC85C,FAM9C,CCDC178,PATE2,BACH2,FZD3
RRN3P2	hsa-miR-338-3p	TSPYL4,CDC42SE1,WNT9A,CELSR2,CYP27B1,KCNA4,CC2D2B,FAAH2,PLA2G3,MAP2
RRN3P2	hsa-miR-375	KIAA0232,CBX3,APPL2,ZNF785,CNN3,NXT2,HOMER2,ANKRD1,HK2,SET,USP10
RRN3P2	hsa-miR-10a-5p	BACH2,TMEM170B,NONO
RRN3P2	hsa-miR-455-5p	FKBP9,HNRNPL,RASSF2,NCSTN,TRPV2,PATE2,POLI
RRN3P2	hsa-miR-490-3p	KLF13,UHMK1,RAB33B,ERRFI1,ZNF490,ZBTB2
C22orf24	hsa-miR-507	STRN3,EI24,BACH2,KIAA0232,RAB12,GPC4,SKI,FAM86C1,LCN10,STAT1,FAM9C,GSTM4,CASQ2,PCDH19
C22orf24	hsa-miR-140-5p	STRN3,CREB3L1,NCSTN,EP300,DLST,STAT1
C22orf24	hsa-miR-876-3p	TMEM170B,TRIM21,FABP2,ZDBF2,KCTD15,YWHAE,IFIT3,ELSPBP1,FAT1,CDCP1
C22orf24	hsa-miR-1244	ACVR2A,VLDLR,PPP3R1,RNGTT,H2AFY2,TRHDE,DAPK1,CDK17
C22orf24	hsa-miR-184	SLC6A9,CREB3L1
C22orf24	hsa-miR-4735-3p	ITGA2
C22orf24	hsa-miR-206	ZNF281,WBP2,CCL2,ATP6V1A,MET,BMP3,NBEA,EYA4,E2F5,PDGFA,CCDC170,UHMK1,ZNF516,NXT2,BACH2,CDC42SE1,CNN3,VAMP2,KLF13,SOWAHC,CPED1,SMKR1,DLG4,CXCL6
C22orf24	hsa-miR-613	BACH2,CNN3,ATP6V1A,WBP2,CCL2,SMKR1,SOWAHC,NXT2,NBEA,CPED1,VAMP2,ZNF516,DLG4,BMP3,E2F5,PDGFA,CCDC170,CDC42SE1,EYA4,UHMK1,ZNF281,CXCL6,KLF13
C22orf24	hsa-miR-761	SLC22A15,SLC9A3R2,NUCB1,DNM1,CD180,TAF1D,KIF21B,CDC42SE1,FAM163A,SLC25A39,CTNNB1,PLA2G3,PNPLA2,HAMP,TRIP10,LY6E,CELSR2,UHMK1,KCTD15,ABR,TULP4,PNPLA6,FLOT2,KLF13,LTF,FBXO17
C22orf24	hsa-miR-3619-5p	LY6E,SLC25A39,KCTD15,TAF1D,PNPLA2,LTF,TRIP10,TULP4,SLC22A15,C1QTNF1,FBXO17,ABR,PLA2G3,HAMP,KLF13,CD180,FAM163A,FLOT2,CDC42SE1,CTNNB1,DNM1,CELSR2,UHMK1,NUCB1,KIF21B,PNPLA6,SLC9A3R2
C22orf24	hsa-miR-24-3p	STRN3,PCDHB2,ATP6V1A,STX16,TRIB3,DARS,HECTD3,OAS2,RAB3IL1,CYP11B2,GPC4,KIF21B,ZNF708,ZNF281,USP10,USP18,RAB8A,PDPK1,ZNF490,MAPKAPK2,QPCTL,IGF2R,BNIP3L,STX5,TXNDC16,VAV1,YBX2,ZNF317,LENEP,CCDC58,NCSTN,APPL2,SUSD2,S1PR1,KLHDC3,HIPK1
C22orf24	hsa-miR-27a-3p	STX16,EDNRA,ATP6V1A,TMEM170B,FBXO46,MKNK2,INSM2,RNGTT,NXT2,ITGA5,KCNA4,PDPK1,NEUROD6,PKIA,CNN3,EYA4,MET,MBNL2
C22orf24	hsa-miR-490-3p	KLF13,UHMK1,RAB33B,ERRFI1,ZNF490,ZBTB2
C7orf69	hsa-miR-1297	VLDLR,CHEK2,SRSF6,OTUD6B,DLG4,SERPINA10,ZNF516,CHAC1,ERLIN1,ENPP4,DDIT4,SAMD12,SKP2,RALYL,TXNDC16,PPP3R1,PALLD,CPED1,ITGA5,RHCG,DCLK1,DAPK1,TSPYL4,ZNF708,MAP2,SACS,NHS,GPC4,HMGA1,RGS17,PARP14
C7orf69	hsa-miR-4465	SACS,CHAC1
LINC00208	hsa-miR-140-5p	STRN3,CREB3L1,NCSTN,EP300,DLST,STAT1
LINC00208	hsa-miR-876-3p	TMEM170B,TRIM21,FABP2,ZDBF2,KCTD15,YWHAE,IFIT3,ELSPBP1,FAT1,CDCP1
LINC00208	hsa-miR-1244	ACVR2A,VLDLR,PPP3R1,RNGTT,H2AFY2,TRHDE,DAPK1,CDK17
LINC00208	hsa-miR-146b-5p	KCTD15,ZBTB2
LINC00208	hsa-miR-22-3p	SIRT1,BSG,ARFIP2,DDIT4,EP300,HIPK1,OTUD6B,
LINC00208	hsa-miR-125a-5p	STAT1,CDC42SE1,IL16,EDEM1,KCTD15,HK2,GPC4,KLF13,FLOT2,MKNK2,MLF2,TNFSF4,SLC35A4,ALPK3
LINC00208	hsa-miR-125b-5p	STAT1,EDEM1,ALPK3,MLF2,MKNK2,HK2,IL16,GPC4,CDC42SE1,C1orf109,TNFSF4,SLC35A4,KLF13,KCTD15,FLOT2
C20orf197	hsa-miR-135a-5p	NR3C2,YBX2,SIRT1,NBEA,PDGFA,DCLK1,CENPB,CCDC170,VLDLR,RAB33B,SLC9A3R2
C20orf197	hsa-miR-137	CDCP1,JDP2,JMY,RAB11B,MAPKAPK2,SPATA16,NXT2,SLC35A4,SGCG,FZD3,INPP5A,C11orf87,CLEC3A,BNIP3L,ANKRD12,FOXC1,UNC79,SRSF6,LZTS3,STAT1,ENPP4,SKI,NBEA,MBNL2,SLC6A9,IFIT3,CD83,ZNF516,CALCOCO1,APPL2
C20orf197	hsa-miR-140-5p	STRN3,CREB3L1,NCSTN,EP300,DLST,STAT1
C20orf197	hsa-miR-876-3p	TMEM170B,TRIM21,FABP2,ZDBF2,KCTD15,YWHAE,IFIT3,ELSPBP1,FAT1,CDCP1
C20orf197	hsa-miR-1244	ACVR2A,VLDLR,PPP3R1,RNGTT,H2AFY2,TRHDE,DAPK1,CDK17
C20orf197	hsa-miR-17-5p	VLDLR,SACS,ZNF785,SKI,NBEA,CPNE1,PPP3R1,FAT4,PKIA,TRIP10,SYBU,FOXC1,RAB12,SYT16,ERLIN1,ITGA2,IRF9,NANOS1,ETV1,ANKRD12,E2F5,PXDN,CTSK,FZD3,MKNK2,ABCG4,KIAA0232,PDPK1,TGFB1I1,FAHD1,BNIP3L,SAMD12,KCNK6,S1PR1,SOWAHC,RASSF2,CXCL6,PPP2R1A,CAMK2N2,RANGAP1,CAPRIN2,ZBTB41,PCSK5
C20orf197	hsa-miR-20b-5p	BNIP3L,S1PR1,SAMD12,PPP3R1,ABCG4,VLDLR,CAPRIN2,E2F5,FAT4,RAB12,CAMK2N2,ETV1,SKI,ZBTB41,SOWAHC,PKIA,NBEA,RASSF2,SACS,NANOS1,TRIP10,IRF9,MKNK2,KIAA0232,FZD3,ANKRD12
C20orf197	hsa-miR-518a-3p	ZNF281
C20orf197	hsa-miR-4735-3p	ITGA2
C20orf197	hsa-miR-508-3p	ANXA10,TECTB,NONO,DCLK1,RGS17,RAB12,CNN3,FLOT2
C20orf197	hsa-miR-24-3p	STRN3,PCDHB2,ATP6V1A,STX16,TRIB3,DARS,HECTD3,OAS2,RAB3IL1,CYP11B2,GPC4,KIF21B,ZNF708,ZNF281,USP10,USP18,RAB8A,PDPK1,ZNF490,MAPKAPK2,QPCTL,IGF2R,BNIP3L,STX5,TXNDC16,VAV1,YBX2,ZNF317,LENEP,CCDC58,NCSTN,APPL2,SUSD2,S1PR1,KLHDC3,HIPK1
C20orf197	hsa-miR-363-3p	CLEC3A,ANKRD12,ASB5,S1PR1,TULP4,RGS17,FKBP9,C6orf62,STRN3,OTUD6B,DDIT4,ITGA5,MKNK2,JMY,FAAH2,HIPK1,PMEPA1,SPRR2B,TRHDE,EDEM1
C20orf197	hsa-miR-27a-3p	STX16,EDNRA,ATP6V1A,TMEM170B,FBXO46,MKNK2,INSM2,RNGTT,NXT2,ITGA5,KCNA4,PDPK1,NEUROD6,PKIA,CNN3,EYA4,MET,MBNL2
C20orf197	hsa-miR-338-3p	TSPYL4,CDC42SE1,WNT9A,CELSR2,CYP27B1,KCNA4,CC2D2B,FAAH2,PLA2G3,MAP2
C20orf197	hsa-miR-455-5p	FKBP9,HNRNPL,RASSF2,NCSTN,TRPV2,PATE2,POLI
C20orf197	hsa-miR-129-5p	EP300,LCN10,ZNF281,STAT1,SMKR1,PCDH19,RAB33B,CNN3,USP10,NR3C2,PSMB9,NPM3,IL17RB,VLDLR,TULP4,ETV1,STRN3,F13A1,ITIH5,PDPK1,KIAA0232,POLR3E,NXT2,PMEPA1,OTUD6B,BACH2,SLC43A3,CCDC170,HIPK1,ZNF571,TTYH1,ZNF793,HNRNPL,APOLD1,EI24,RANGAP1,MKNK2
AL022341	hsa-miR-338-3p	TSPYL4,CDC42SE1,WNT9A,CELSR2,CYP27B1,KCNA4,CC2D2B,FAAH2,PLA2G3,MAP2
TDRG1	hsa-miR-17-5p	VLDLR,SACS,ZNF785,SKI,NBEA,CPNE1,PPP3R1,FAT4,PKIA,TRIP10,SYBU,FOXC1,RAB12,SYT16,ERLIN1,ITGA2,IRF9,NANOS1,ETV1,ANKRD12,E2F5,PXDN,CTSK,FZD3,MKNK2,ABCG4,KIAA0232,PDPK1,TGFB1I1,FAHD1,BNIP3L,SAMD12,KCNK6,S1PR1,SOWAHC,RASSF2,CXCL6,PPP2R1A,CAMK2N2,RANGAP1,CAPRIN2,ZBTB41,PCSK5
TDRG1	hsa-miR-20b-5p	BNIP3L,S1PR1,SAMD12,PPP3R1,ABCG4,VLDLR,CAPRIN2,E2F5,FAT4,RAB12,CAMK2N2,ETV1,SKI,ZBTB41,SOWAHC,PKIA,NBEA,RASSF2,SACS,NANOS1,TRIP10,IRF9,MKNK2,KIAA0232,FZD3,ANKRD12
TDRG1	hsa-miR-518a-3p	ZNF281
TDRG1	hsa-miR-4458	HMGA1
TDRG1	hsa-miR-4500	HMGA1
TDRG1	hsa-miR-761	SLC22A15,SLC9A3R2,NUCB1,DNM1,CD180,TAF1D,KIF21B,CDC42SE1,FAM163A,SLC25A39,CTNNB1,PLA2G3,PNPLA2,HAMP,TRIP10,LY6E,CELSR2,UHMK1,KCTD15,ABR,TULP4,PNPLA6,FLOT2,KLF13,LTF,FBXO17
TDRG1	hsa-miR-3619-5p	LY6E,SLC25A39,KCTD15,TAF1D,PNPLA2,LTF,TRIP10,TULP4,SLC22A15,C1QTNF1,FBXO17,ABR,PLA2G3,HAMP,KLF13,CD180,FAM163A,FLOT2,CDC42SE1,CTNNB1,DNM1,CELSR2,UHMK1,NUCB1,KIF21B,PNPLA6,SLC9A3R2
TDRG1	hsa-miR-27a-3p	STX16,EDNRA,ATP6V1A,TMEM170B,FBXO46,MKNK2,INSM2,RNGTT,NXT2,ITGA5,KCNA4,PDPK1,NEUROD6,PKIA,CNN3,EYA4,MET,MBNL2
TDRG1	hsa-miR-338-3p	TSPYL4,CDC42SE1,WNT9A,CELSR2,CYP27B1,KCNA4,CC2D2B,FAAH2,PLA2G3,MAP2
TDRG1	hsa-miR-125a-5p	STAT1,CDC42SE1,IL16,EDEM1,KCTD15,HK2,GPC4,KLF13,FLOT2,MKNK2,MLF2,TNFSF4,SLC35A4,ALPK3
TDRG1	hsa-miR-125b-5p	STAT1,EDEM1,ALPK3,MLF2,MKNK2,HK2,IL16,GPC4,CDC42SE1,C1orf109,TNFSF4,SLC35A4,KLF13,KCTD15,FLOT2
AC008088	hsa-miR-507	STRN3,EI24,BACH2,KIAA0232,RAB12,GPC4,SKI,FAM86C1,LCN10,STAT1,FAM9C,GSTM4,CASQ2,PCDH19
AC008088	hsa-miR-193a-3p	FLI1,STX16,ETV1,PLAU,JMY,SRSF6,AP2M1,FAT4
AC008088	hsa-miR-129-5p	EP300,LCN10,ZNF281,STAT1,SMKR1,PCDH19,RAB33B,CNN3,USP10,NR3C2,PSMB9,NPM3,IL17RB,VLDLR,TULP4,ETV1,STRN3,F13A1,ITIH5,PDPK1,KIAA0232,POLR3E,NXT2,PMEPA1,OTUD6B,BACH2,SLC43A3,CCDC170,HIPK1,ZNF571,TTYH1,ZNF793,HNRNPL,APOLD1,EI24,RANGAP1,MKNK2
LINC00269	hsa-miR-135a-5p	NR3C2,YBX2,SIRT1,NBEA,PDGFA,DCLK1,CENPB,CCDC170,VLDLR,RAB33B,SLC9A3R2
LINC00269	hsa-miR-142-3p	POLI,SYT4,ZBTB41,KIAA0232,AKT1S1,STRN3,SGK1,INPP5A,ARL15,BACH2,ACVR2A,HMGA1,YWHAE,CNN3,CTNNB1
LINC00269	hsa-miR-17-5p	VLDLR,SACS,ZNF785,SKI,NBEA,CPNE1,PPP3R1,FAT4,PKIA,TRIP10,SYBU,FOXC1,RAB12,SYT16,ERLIN1,ITGA2,IRF9,NANOS1,ETV1,ANKRD12,E2F5,PXDN,CTSK,FZD3,MKNK2,ABCG4,KIAA0232,PDPK1,TGFB1I1,FAHD1,BNIP3L,SAMD12,KCNK6,S1PR1,SOWAHC,RASSF2,CXCL6,PPP2R1A,CAMK2N2,RANGAP1,CAPRIN2,ZBTB41,PCSK5
LINC00269	hsa-miR-20b-5p	BNIP3L,S1PR1,SAMD12,PPP3R1,ABCG4,VLDLR,CAPRIN2,E2F5,FAT4,RAB12,CAMK2N2,ETV1,SKI,ZBTB41,SOWAHC,PKIA,NBEA,RASSF2,SACS,NANOS1,TRIP10,IRF9,MKNK2,KIAA0232,FZD3,ANKRD12
LINC00269	hsa-miR-518a-3p	ZNF281
LINC00269	hsa-miR-761	SLC22A15,SLC9A3R2,NUCB1,DNM1,CD180,TAF1D,KIF21B,CDC42SE1,FAM163A,SLC25A39,CTNNB1,PLA2G3,PNPLA2,HAMP,TRIP10,LY6E,CELSR2,UHMK1,KCTD15,ABR,TULP4,PNPLA6,FLOT2,KLF13,LTF,FBXO17
LINC00269	hsa-miR-3619-5p	LY6E,SLC25A39,KCTD15,TAF1D,PNPLA2,LTF,TRIP10,TULP4,SLC22A15,C1QTNF1,FBXO17,ABR,PLA2G3,HAMP,KLF13,CD180,FAM163A,FLOT2,CDC42SE1,CTNNB1,DNM1,CELSR2,UHMK1,NUCB1,KIF21B,PNPLA6,SLC9A3R2
LINC00269	hsa-miR-216b-5p	GABPA,NONO,ANXA10,EDNRA,IL25,QPCTL,SLC22A15,STX16,HK2,SAMD12,TMEM170B,SOWAHC
LINC00269	hsa-miR-1297	VLDLR,CHEK2,SRSF6,OTUD6B,DLG4,SERPINA10,ZNF516,CHAC1,ERLIN1,ENPP4,DDIT4,SAMD12,SKP2,RALYL,TXNDC16,PPP3R1,PALLD,CPED1,ITGA5,RHCG,DCLK1,DAPK1,TSPYL4,ZNF708,MAP2,SACS,NHS,GPC4,HMGA1,RGS17,PARP14
LINC00269	hsa-miR-4465	SACS,CHAC1
LINC00269	hsa-miR-107	FAT4,FLOT2,TRAPPC1,TK1,SOWAHC,FOXC1,ENPP4,PCSK5,FGFRL1,CD180,ITGA2,EI24,APLN,TULP4,CELSR2,CCDC85C,FAM9C,CCDC178,PATE2,BACH2,FZD3
LINC00269	hsa-miR-338-3p	TSPYL4,CDC42SE1,WNT9A,CELSR2,CYP27B1,KCNA4,CC2D2B,FAAH2,PLA2G3,MAP2
LINC00269	hsa-miR-129-5p	EP300,LCN10,ZNF281,STAT1,SMKR1,PCDH19,RAB33B,CNN3,USP10,NR3C2,PSMB9,NPM3,IL17RB,VLDLR,TULP4,ETV1,STRN3,F13A1,ITIH5,PDPK1,KIAA0232,POLR3E,NXT2,PMEPA1,OTUD6B,BACH2,SLC43A3,CCDC170,HIPK1,ZNF571,TTYH1,ZNF793,HNRNPL,APOLD1,EI24,RANGAP1,MKNK2
COX10-AS1	hsa-miR-140-5p	STRN3,CREB3L1,NCSTN,EP300,DLST,STAT1
COX10-AS1	hsa-miR-876-3p	TMEM170B,TRIM21,FABP2,ZDBF2,KCTD15,YWHAE,IFIT3,ELSPBP1,FAT1,CDCP1
COX10-AS1	hsa-miR-1244	ACVR2A,VLDLR,PPP3R1,RNGTT,H2AFY2,TRHDE,DAPK1,CDK17
COX10-AS1	hsa-miR-142-3p	POLI,SYT4,ZBTB41,KIAA0232,AKT1S1,STRN3,SGK1,INPP5A,ARL15,BACH2,ACVR2A,HMGA1,YWHAE,CNN3,CTNNB1
COX10-AS1	hsa-miR-17-5p	VLDLR,SACS,ZNF785,SKI,NBEA,CPNE1,PPP3R1,FAT4,PKIA,TRIP10,SYBU,FOXC1,RAB12,SYT16,ERLIN1,ITGA2,IRF9,NANOS1,ETV1,ANKRD12,E2F5,PXDN,CTSK,FZD3,MKNK2,ABCG4,KIAA0232,PDPK1,TGFB1I1,FAHD1,BNIP3L,SAMD12,KCNK6,S1PR1,SOWAHC,RASSF2,CXCL6,PPP2R1A,CAMK2N2,RANGAP1,CAPRIN2,ZBTB41,PCSK5
COX10-AS1	hsa-miR-20b-5p	BNIP3L,S1PR1,SAMD12,PPP3R1,ABCG4,VLDLR,CAPRIN2,E2F5,FAT4,RAB12,CAMK2N2,ETV1,SKI,ZBTB41,SOWAHC,PKIA,NBEA,RASSF2,SACS,NANOS1,TRIP10,IRF9,MKNK2,KIAA0232,FZD3,ANKRD12
COX10-AS1	hsa-miR-518a-3p	ZNF281
COX10-AS1	hsa-miR-4458	HMGA1
COX10-AS1	hsa-miR-4500	HMGA1
COX10-AS1	hsa-miR-206	ZNF281,WBP2,CCL2,ATP6V1A,MET,BMP3,NBEA,EYA4,E2F5,PDGFA,CCDC170,UHMK1,ZNF516,NXT2,BACH2,CDC42SE1,CNN3,VAMP2,KLF13,SOWAHC,CPED1,SMKR1,DLG4,CXCL6
COX10-AS1	hsa-miR-613	BACH2,CNN3,ATP6V1A,WBP2,CCL2,SMKR1,SOWAHC,NXT2,NBEA,CPED1,VAMP2,ZNF516,DLG4,BMP3,E2F5,PDGFA,CCDC170,CDC42SE1,EYA4,UHMK1,ZNF281,CXCL6,KLF13
COX10-AS1	hsa-miR-761	SLC22A15,SLC9A3R2,NUCB1,DNM1,CD180,TAF1D,KIF21B,CDC42SE1,FAM163A,SLC25A39,CTNNB1,PLA2G3,PNPLA2,HAMP,TRIP10,LY6E,CELSR2,UHMK1,KCTD15,ABR,TULP4,PNPLA6,FLOT2,KLF13,LTF,FBXO17
COX10-AS1	hsa-miR-3619-5p	LY6E,SLC25A39,KCTD15,TAF1D,PNPLA2,LTF,TRIP10,TULP4,SLC22A15,C1QTNF1,FBXO17,ABR,PLA2G3,HAMP,KLF13,CD180,FAM163A,FLOT2,CDC42SE1,CTNNB1,DNM1,CELSR2,UHMK1,NUCB1,KIF21B,PNPLA6,SLC9A3R2
COX10-AS1	hsa-miR-217	ZNF708,SLC4A2,UBXN11,DACT1,C11orf87,CHPF,ATP6V1A,ZNF317,ACKR3,TXNDC16,BACH2,NAP1L2,RAB11B,NEXN,SIRT1,HOMER2,TMEM170B,TAF1D,ZNF490
COX10-AS1	hsa-miR-508-3p	ANXA10,TECTB,NONO,DCLK1,RGS17,RAB12,CNN3,FLOT2
COX10-AS1	hsa-miR-22-3p	SIRT1,BSG,ARFIP2,DDIT4,EP300,HIPK1,OTUD6B,
COX10-AS1	hsa-miR-363-3p	CLEC3A,ANKRD12,ASB5,S1PR1,TULP4,RGS17,FKBP9,C6orf62,STRN3,OTUD6B,DDIT4,ITGA5,MKNK2,JMY,FAAH2,HIPK1,PMEPA1,SPRR2B,TRHDE,EDEM1
COX10-AS1	hsa-miR-10a-5p	BACH2,TMEM170B,NONO
AC010145	hsa-miR-140-5p	STRN3,CREB3L1,NCSTN,EP300,DLST,STAT1
AC010145	hsa-miR-876-3p	TMEM170B,TRIM21,FABP2,ZDBF2,KCTD15,YWHAE,IFIT3,ELSPBP1,FAT1,CDCP1
AC010145	hsa-miR-1244	ACVR2A,VLDLR,PPP3R1,RNGTT,H2AFY2,TRHDE,DAPK1,CDK17
AC010145	hsa-miR-4262	KIF2C,DDIT4,CAPRIN2
AC010145	hsa-miR-4735-3p	ITGA2
AC010145	hsa-miR-193a-3p	FLI1,STX16,ETV1,PLAU,JMY,SRSF6,AP2M1,FAT4
AC010145	hsa-miR-761	SLC22A15,SLC9A3R2,NUCB1,DNM1,CD180,TAF1D,KIF21B,CDC42SE1,FAM163A,SLC25A39,CTNNB1,PLA2G3,PNPLA2,HAMP,TRIP10,LY6E,CELSR2,UHMK1,KCTD15,ABR,TULP4,PNPLA6,FLOT2,KLF13,LTF,FBXO17
AC010145	hsa-miR-3619-5p	LY6E,SLC25A39,KCTD15,TAF1D,PNPLA2,LTF,TRIP10,TULP4,SLC22A15,C1QTNF1,FBXO17,ABR,PLA2G3,HAMP,KLF13,CD180,FAM163A,FLOT2,CDC42SE1,CTNNB1,DNM1,CELSR2,UHMK1,NUCB1,KIF21B,PNPLA6,SLC9A3R2
AC010145	hsa-miR-23b-3p	TSPYL4,C6orf62,ZBTB2,NLGN4X,INPP5A,PCDH19,MET,SOWAHC,PLAU,SYT4,RALYL,STAT1,WBP2,PDE4B,ZNF793,ZDBF2,BNIP3L,SGK1,PKIA,PDPK1,ETV1,EGR3
AC010145	hsa-miR-125a-5p	STAT1,CDC42SE1,IL16,EDEM1,KCTD15,HK2,GPC4,KLF13,FLOT2,MKNK2,MLF2,TNFSF4,SLC35A4,ALPK3
AC010145	hsa-miR-125b-5p	STAT1,EDEM1,ALPK3,MLF2,MKNK2,HK2,IL16,GPC4,CDC42SE1,C1orf109,TNFSF4,SLC35A4,KLF13,KCTD15,FLOT2
AC010145	hsa-miR-10a-5p	BACH2,TMEM170B,NONO
AC073321	hsa-miR-27a-3p	STX16,EDNRA,ATP6V1A,TMEM170B,FBXO46,MKNK2,INSM2,RNGTT,NXT2,ITGA5,KCNA4,PDPK1,NEUROD6,PKIA,CNN3,EYA4,MET,MBNL2
AC073321	hsa-miR-107	FAT4,FLOT2,TRAPPC1,TK1,SOWAHC,FOXC1,ENPP4,PCSK5,FGFRL1,CD180,ITGA2,EI24,APLN,TULP4,CELSR2,CCDC85C,FAM9C,CCDC178,PATE2,BACH2,FZD3
AC073321	hsa-miR-10a-5p	BACH2,TMEM170B,NONO
AC073321	hsa-miR-129-5p	EP300,LCN10,ZNF281,STAT1,SMKR1,PCDH19,RAB33B,CNN3,USP10,NR3C2,PSMB9,NPM3,IL17RB,VLDLR,TULP4,ETV1,STRN3,F13A1,ITIH5,PDPK1,KIAA0232,POLR3E,NXT2,PMEPA1,OTUD6B,BACH2,SLC43A3,CCDC170,HIPK1,ZNF571,TTYH1,ZNF793,HNRNPL,APOLD1,EI24,RANGAP1,MKNK2
AC073321	hsa-miR-490-3p	KLF13,UHMK1,RAB33B,ERRFI1,ZNF490,ZBTB2
AC017002	hsa-miR-212-3p	EP300,ENPP4,KCTD15,ARHGAP32,E2F5,VMP1,LZTS3,ZNF516,ABR,CHAC1,SIRT1,MTFR2
AC017002	hsa-miR-4262	KIF2C,DDIT4,CAPRIN2
AC017002	hsa-miR-4458	HMGA1
AC017002	hsa-miR-4500	HMGA1
AC017002	hsa-miR-4735-3p	ITGA2
AC017002	hsa-miR-590-5p	IL1B,PRPF39,ARHGAP32,SKP2,PATE2,SKI,BMP3,ZBTB41
AC017002	hsa-miR-27a-3p	STX16,EDNRA,ATP6V1A,TMEM170B,FBXO46,MKNK2,INSM2,RNGTT,NXT2,ITGA5,KCNA4,PDPK1,NEUROD6,PKIA,CNN3,EYA4,MET,MBNL2
AC017002	hsa-miR-425-5p	RGSL1,PCDHB5,ANKRD1,PLD6,CXCL6
JPX	hsa-miR-301b-3p	NR3C2,PMEPA1,MET,BMP3,CAPRIN2,ENPP4,RASSF2,PXDN,KCNA4,TNF,ANKRD12,JMY,S1PR1,SYBU,TMEM170B
JPX	hsa-miR-4295	CAPRIN2,ENPP4,JMY
JPX	hsa-miR-3666	CAPRIN2,ENPP4,JMY
JPX	hsa-miR-140-5p	STRN3,CREB3L1,NCSTN,EP300,DLST,STAT1
JPX	hsa-miR-876-3p	TMEM170B,TRIM21,FABP2,ZDBF2,KCTD15,YWHAE,IFIT3,ELSPBP1,FAT1,CDCP1
JPX	hsa-miR-1244	ACVR2A,VLDLR,PPP3R1,RNGTT,H2AFY2,TRHDE,DAPK1,CDK17
JPX	hsa-miR-146b-5p	KCTD15,ZBTB2
JPX	hsa-miR-193a-3p	FLI1,STX16,ETV1,PLAU,JMY,SRSF6,AP2M1,FAT4
JPX	hsa-miR-216b-5p	GABPA,NONO,ANXA10,EDNRA,IL25,QPCTL,SLC22A15,STX16,HK2,SAMD12,TMEM170B,SOWAHC
JPX	hsa-miR-508-3p	ANXA10,TECTB,NONO,DCLK1,RGS17,RAB12,CNN3,FLOT2
JPX	hsa-miR-23b-3p	TSPYL4,C6orf62,ZBTB2,NLGN4X,INPP5A,PCDH19,MET,SOWAHC,PLAU,SYT4,RALYL,STAT1,WBP2,PDE4B,ZNF793,ZDBF2,BNIP3L,SGK1,PKIA,PDPK1,ETV1,EGR3
JPX	hsa-miR-24-3p	STRN3,PCDHB2,ATP6V1A,STX16,TRIB3,DARS,HECTD3,OAS2,RAB3IL1,CYP11B2,GPC4,KIF21B,ZNF708,ZNF281,USP10,USP18,RAB8A,PDPK1,ZNF490,MAPKAPK2,QPCTL,IGF2R,BNIP3L,STX5,TXNDC16,VAV1,YBX2,ZNF317,LENEP,CCDC58,NCSTN,APPL2,SUSD2,S1PR1,KLHDC3,HIPK1
JPX	hsa-miR-363-3p	CLEC3A,ANKRD12,ASB5,S1PR1,TULP4,RGS17,FKBP9,C6orf62,STRN3,OTUD6B,DDIT4,ITGA5,MKNK2,JMY,FAAH2,HIPK1,PMEPA1,SPRR2B,TRHDE,EDEM1
JPX	hsa-miR-449c-5p	MET,PXDN,ERLIN1,ZNF546,FLOT2,GABPA,ANKRD12,TSPYL4,ZNF317
JPX	hsa-miR-375	KIAA0232,CBX3,APPL2,ZNF785,CNN3,NXT2,HOMER2,ANKRD1,HK2,SET,USP10
JPX	hsa-miR-129-5p	EP300,LCN10,ZNF281,STAT1,SMKR1,PCDH19,RAB33B,CNN3,USP10,NR3C2,PSMB9,NPM3,IL17RB,VLDLR,TULP4,ETV1,STRN3,F13A1,ITIH5,PDPK1,KIAA0232,POLR3E,NXT2,PMEPA1,OTUD6B,BACH2,SLC43A3,CCDC170,HIPK1,ZNF571,TTYH1,ZNF793,HNRNPL,APOLD1,EI24,RANGAP1,MKNK2
AC017002	hsa-miR-135a-5p	NR3C2,YBX2,SIRT1,NBEA,PDGFA,DCLK1,CENPB,CCDC170,VLDLR,RAB33B,SLC9A3R2
AC073321	hsa-miR-146b-5p	KCTD15,ZBTB2
RUSC1-AS1	hsa-miR-507	STRN3,EI24,BACH2,KIAA0232,RAB12,GPC4,SKI,FAM86C1,LCN10,STAT1,FAM9C,GSTM4,CASQ2,PCDH19
RUSC1-AS1	hsa-miR-135a-5p	NR3C2,YBX2,SIRT1,NBEA,PDGFA,DCLK1,CENPB,CCDC170,VLDLR,RAB33B,SLC9A3R2
RUSC1-AS1	hsa-miR-139-5p	UHMK1,PSPH,STX16,ARL15,C3orf70,HIPK1,DDIT4,MAP2,AXL,NME7,JDP2,ARHGAP32,TAF1D
RUSC1-AS1	hsa-miR-4262	KIF2C,DDIT4,CAPRIN2
RUSC1-AS1	hsa-miR-4735-3p	ITGA2
RUSC1-AS1	hsa-miR-193a-3p	FLI1,STX16,ETV1,PLAU,JMY,SRSF6,AP2M1,FAT4
RUSC1-AS1	hsa-miR-761	SLC22A15,SLC9A3R2,NUCB1,DNM1,CD180,TAF1D,KIF21B,CDC42SE1,FAM163A,SLC25A39,CTNNB1,PLA2G3,PNPLA2,HAMP,TRIP10,LY6E,CELSR2,UHMK1,KCTD15,ABR,TULP4,PNPLA6,FLOT2,KLF13,LTF,FBXO17
RUSC1-AS1	hsa-miR-3619-5p	LY6E,SLC25A39,KCTD15,TAF1D,PNPLA2,LTF,TRIP10,TULP4,SLC22A15,C1QTNF1,FBXO17,ABR,PLA2G3,HAMP,KLF13,CD180,FAM163A,FLOT2,CDC42SE1,CTNNB1,DNM1,CELSR2,UHMK1,NUCB1,KIF21B,PNPLA6,SLC9A3R2
RUSC1-AS1	hsa-miR-216b-5p	GABPA,NONO,ANXA10,EDNRA,IL25,QPCTL,SLC22A15,STX16,HK2,SAMD12,TMEM170B,SOWAHC
RUSC1-AS1	hsa-miR-22-3p	SIRT1,BSG,ARFIP2,DDIT4,EP300,HIPK1,OTUD6B,
RUSC1-AS1	hsa-miR-363-3p	CLEC3A,ANKRD12,ASB5,S1PR1,TULP4,RGS17,FKBP9,C6orf62,STRN3,OTUD6B,DDIT4,ITGA5,MKNK2,JMY,FAAH2,HIPK1,PMEPA1,SPRR2B,TRHDE,EDEM1
RUSC1-AS1	hsa-miR-125a-5p	STAT1,CDC42SE1,IL16,EDEM1,KCTD15,HK2,GPC4,KLF13,FLOT2,MKNK2,MLF2,TNFSF4,SLC35A4,ALPK3
RUSC1-AS1	hsa-miR-125b-5p	STAT1,EDEM1,ALPK3,MLF2,MKNK2,HK2,IL16,GPC4,CDC42SE1,C1orf109,TNFSF4,SLC35A4,KLF13,KCTD15,FLOT2
RUSC1-AS1	hsa-miR-10a-5p	BACH2,TMEM170B,NONO
RUSC1-AS1	hsa-miR-455-5p	FKBP9,HNRNPL,RASSF2,NCSTN,TRPV2,PATE2,POLI
AC010145	hsa-miR-507	STRN3,EI24,BACH2,KIAA0232,RAB12,GPC4,SKI,FAM86C1,LCN10,STAT1,FAM9C,GSTM4,CASQ2,PCDH19
AC010145	hsa-miR-24-3p	STRN3,PCDHB2,ATP6V1A,STX16,TRIB3,DARS,HECTD3,OAS2,RAB3IL1,CYP11B2,GPC4,KIF21B,ZNF708,ZNF281,USP10,USP18,RAB8A,PDPK1,ZNF490,MAPKAPK2,QPCTL,IGF2R,BNIP3L,STX5,TXNDC16,VAV1,YBX2,ZNF317,LENEP,CCDC58,NCSTN,APPL2,SUSD2,S1PR1,KLHDC3,HIPK1
AC010145	hsa-miR-338-3p	TSPYL4,CDC42SE1,WNT9A,CELSR2,CYP27B1,KCNA4,CC2D2B,FAAH2,PLA2G3,MAP2
AL022341	hsa-miR-184	SLC6A9,CREB3L1
AL022341	hsa-miR-22-3p	SIRT1,BSG,ARFIP2,DDIT4,EP300,HIPK1,OTUD6B,
AL022341	hsa-miR-125a-5p	STAT1,CDC42SE1,IL16,EDEM1,KCTD15,HK2,GPC4,KLF13,FLOT2,MKNK2,MLF2,TNFSF4,SLC35A4,ALPK3
AL022341	hsa-miR-125b-5p	STAT1,EDEM1,ALPK3,MLF2,MKNK2,HK2,IL16,GPC4,CDC42SE1,C1orf109,TNFSF4,SLC35A4,KLF13,KCTD15,FLOT2
AC008753	hsa-miR-139-5p	UHMK1,PSPH,STX16,ARL15,C3orf70,HIPK1,DDIT4,MAP2,AXL,NME7,JDP2,ARHGAP32,TAF1D
AC008753	hsa-miR-449c-5p	MET,PXDN,ERLIN1,ZNF546,FLOT2,GABPA,ANKRD12,TSPYL4,ZNF317
ITPKB-IT1	hsa-miR-146b-5p	KCTD15,ZBTB2
ITPKB-IT1	hsa-miR-761	SLC22A15,SLC9A3R2,NUCB1,DNM1,CD180,TAF1D,KIF21B,CDC42SE1,FAM163A,SLC25A39,CTNNB1,PLA2G3,PNPLA2,HAMP,TRIP10,LY6E,CELSR2,UHMK1,KCTD15,ABR,TULP4,PNPLA6,FLOT2,KLF13,LTF,FBXO17
ITPKB-IT1	hsa-miR-3619-5p	LY6E,SLC25A39,KCTD15,TAF1D,PNPLA2,LTF,TRIP10,TULP4,SLC22A15,C1QTNF1,FBXO17,ABR,PLA2G3,HAMP,KLF13,CD180,FAM163A,FLOT2,CDC42SE1,CTNNB1,DNM1,CELSR2,UHMK1,NUCB1,KIF21B,PNPLA6,SLC9A3R2
ITPKB-IT1	hsa-miR-1297	VLDLR,CHEK2,SRSF6,OTUD6B,DLG4,SERPINA10,ZNF516,CHAC1,ERLIN1,ENPP4,DDIT4,SAMD12,SKP2,RALYL,TXNDC16,PPP3R1,PALLD,CPED1,ITGA5,RHCG,DCLK1,DAPK1,TSPYL4,ZNF708,MAP2,SACS,NHS,GPC4,HMGA1,RGS17,PARP14
ITPKB-IT1	hsa-miR-4465	SACS,CHAC1
ITPKB-IT1	hsa-miR-107	FAT4,FLOT2,TRAPPC1,TK1,SOWAHC,FOXC1,ENPP4,PCSK5,FGFRL1,CD180,ITGA2,EI24,APLN,TULP4,CELSR2,CCDC85C,FAM9C,CCDC178,PATE2,BACH2,FZD3
ITPKB-IT1	hsa-miR-375	KIAA0232,CBX3,APPL2,ZNF785,CNN3,NXT2,HOMER2,ANKRD1,HK2,SET,USP10
ITPKB-IT1	hsa-miR-125a-5p	STAT1,CDC42SE1,IL16,EDEM1,KCTD15,HK2,GPC4,KLF13,FLOT2,MKNK2,MLF2,TNFSF4,SLC35A4,ALPK3
ITPKB-IT1	hsa-miR-125b-5p	STAT1,EDEM1,ALPK3,MLF2,MKNK2,HK2,IL16,GPC4,CDC42SE1,C1orf109,TNFSF4,SLC35A4,KLF13,KCTD15,FLOT2
ITPKB-IT1	hsa-miR-129-5p	EP300,LCN10,ZNF281,STAT1,SMKR1,PCDH19,RAB33B,CNN3,USP10,NR3C2,PSMB9,NPM3,IL17RB,VLDLR,TULP4,ETV1,STRN3,F13A1,ITIH5,PDPK1,KIAA0232,POLR3E,NXT2,PMEPA1,OTUD6B,BACH2,SLC43A3,CCDC170,HIPK1,ZNF571,TTYH1,ZNF793,HNRNPL,APOLD1,EI24,RANGAP1,MKNK2
KCNQ1-AS1	hsa-miR-761	SLC22A15,SLC9A3R2,NUCB1,DNM1,CD180,TAF1D,KIF21B,CDC42SE1,FAM163A,SLC25A39,CTNNB1,PLA2G3,PNPLA2,HAMP,TRIP10,LY6E,CELSR2,UHMK1,KCTD15,ABR,TULP4,PNPLA6,FLOT2,KLF13,LTF,FBXO17
KCNQ1-AS1	hsa-miR-3619-5p	LY6E,SLC25A39,KCTD15,TAF1D,PNPLA2,LTF,TRIP10,TULP4,SLC22A15,C1QTNF1,FBXO17,ABR,PLA2G3,HAMP,KLF13,CD180,FAM163A,FLOT2,CDC42SE1,CTNNB1,DNM1,CELSR2,UHMK1,NUCB1,KIF21B,PNPLA6,SLC9A3R2
KCNQ1-AS1	hsa-miR-22-3p	SIRT1,BSG,ARFIP2,DDIT4,EP300,HIPK1,OTUD6B,
KCNQ1-AS1	hsa-miR-27a-3p	STX16,EDNRA,ATP6V1A,TMEM170B,FBXO46,MKNK2,INSM2,RNGTT,NXT2,ITGA5,KCNA4,PDPK1,NEUROD6,PKIA,CNN3,EYA4,MET,MBNL2
KCNQ1-AS1	hsa-miR-125a-5p	STAT1,CDC42SE1,IL16,EDEM1,KCTD15,HK2,GPC4,KLF13,FLOT2,MKNK2,MLF2,TNFSF4,SLC35A4,ALPK3
KCNQ1-AS1	hsa-miR-125b-5p	STAT1,EDEM1,ALPK3,MLF2,MKNK2,HK2,IL16,GPC4,CDC42SE1,C1orf109,TNFSF4,SLC35A4,KLF13,KCTD15,FLOT2
DIRC3	hsa-miR-507	STRN3,EI24,BACH2,KIAA0232,RAB12,GPC4,SKI,FAM86C1,LCN10,STAT1,FAM9C,GSTM4,CASQ2,PCDH19
DIRC3	hsa-miR-140-5p	STRN3,CREB3L1,NCSTN,EP300,DLST,STAT1
DIRC3	hsa-miR-876-3p	TMEM170B,TRIM21,FABP2,ZDBF2,KCTD15,YWHAE,IFIT3,ELSPBP1,FAT1,CDCP1
DIRC3	hsa-miR-1244	ACVR2A,VLDLR,PPP3R1,RNGTT,H2AFY2,TRHDE,DAPK1,CDK17
DIRC3	hsa-miR-142-3p	POLI,SYT4,ZBTB41,KIAA0232,AKT1S1,STRN3,SGK1,INPP5A,ARL15,BACH2,ACVR2A,HMGA1,YWHAE,CNN3,CTNNB1
DIRC3	hsa-miR-146b-5p	KCTD15,ZBTB2
DIRC3	hsa-miR-4458	HMGA1
DIRC3	hsa-miR-4500	HMGA1
DIRC3	hsa-miR-206	ZNF281,WBP2,CCL2,ATP6V1A,MET,BMP3,NBEA,EYA4,E2F5,PDGFA,CCDC170,UHMK1,ZNF516,NXT2,BACH2,CDC42SE1,CNN3,VAMP2,KLF13,SOWAHC,CPED1,SMKR1,DLG4,CXCL6
DIRC3	hsa-miR-613	BACH2,CNN3,ATP6V1A,WBP2,CCL2,SMKR1,SOWAHC,NXT2,NBEA,CPED1,VAMP2,ZNF516,DLG4,BMP3,E2F5,PDGFA,CCDC170,CDC42SE1,EYA4,UHMK1,ZNF281,CXCL6,KLF13
DIRC3	hsa-miR-429	ERRFI1,C11orf87,NLGN4X,STX16,STAT1,CPED1,SOWAHC,NOG,DDIT4,IGF2R,C4orf46,AMFR,ZNF304,NYAP1,GABPA,FLI1,TXNDC16,KYNU,EP300,DDIT4L,TES,INSM2,KCTD15,NANOS1,FZD3,TRHDE,CDK17,PKIA,CNN3,DGKA,ARL15,PDPK1,HIPK1,TAF1D,RNGTT,MAP2
DIRC3	hsa-miR-761	SLC22A15,SLC9A3R2,NUCB1,DNM1,CD180,TAF1D,KIF21B,CDC42SE1,FAM163A,SLC25A39,CTNNB1,PLA2G3,PNPLA2,HAMP,TRIP10,LY6E,CELSR2,UHMK1,KCTD15,ABR,TULP4,PNPLA6,FLOT2,KLF13,LTF,FBXO17
DIRC3	hsa-miR-3619-5p	LY6E,SLC25A39,KCTD15,TAF1D,PNPLA2,LTF,TRIP10,TULP4,SLC22A15,C1QTNF1,FBXO17,ABR,PLA2G3,HAMP,KLF13,CD180,FAM163A,FLOT2,CDC42SE1,CTNNB1,DNM1,CELSR2,UHMK1,NUCB1,KIF21B,PNPLA6,SLC9A3R2
DIRC3	hsa-miR-508-3p	ANXA10,TECTB,NONO,DCLK1,RGS17,RAB12,CNN3,FLOT2
DIRC3	hsa-miR-24-3p	STRN3,PCDHB2,ATP6V1A,STX16,TRIB3,DARS,HECTD3,OAS2,RAB3IL1,CYP11B2,GPC4,KIF21B,ZNF708,ZNF281,USP10,USP18,RAB8A,PDPK1,ZNF490,MAPKAPK2,QPCTL,IGF2R,BNIP3L,STX5,TXNDC16,VAV1,YBX2,ZNF317,LENEP,CCDC58,NCSTN,APPL2,SUSD2,S1PR1,KLHDC3,HIPK1
DIRC3	hsa-miR-1297	VLDLR,CHEK2,SRSF6,OTUD6B,DLG4,SERPINA10,ZNF516,CHAC1,ERLIN1,ENPP4,DDIT4,SAMD12,SKP2,RALYL,TXNDC16,PPP3R1,PALLD,CPED1,ITGA5,RHCG,DCLK1,DAPK1,TSPYL4,ZNF708,MAP2,SACS,NHS,GPC4,HMGA1,RGS17,PARP14
DIRC3	hsa-miR-4465	SACS,CHAC1
DIRC3	hsa-miR-338-3p	TSPYL4,CDC42SE1,WNT9A,CELSR2,CYP27B1,KCNA4,CC2D2B,FAAH2,PLA2G3,MAP2
DIRC3	hsa-miR-375	KIAA0232,CBX3,APPL2,ZNF785,CNN3,NXT2,HOMER2,ANKRD1,HK2,SET,USP10
DIRC3	hsa-miR-425-5p	RGSL1,PCDHB5,ANKRD1,PLD6,CXCL6
DIRC3	hsa-miR-125a-5p	STAT1,CDC42SE1,IL16,EDEM1,KCTD15,HK2,GPC4,KLF13,FLOT2,MKNK2,MLF2,TNFSF4,SLC35A4,ALPK3
DIRC3	hsa-miR-125b-5p	STAT1,EDEM1,ALPK3,MLF2,MKNK2,HK2,IL16,GPC4,CDC42SE1,C1orf109,TNFSF4,SLC35A4,KLF13,KCTD15,FLOT2
DIRC3	hsa-miR-10a-5p	BACH2,TMEM170B,NONO
DIRC3	hsa-miR-490-3p	KLF13,UHMK1,RAB33B,ERRFI1,ZNF490,ZBTB2
LINC00327	hsa-miR-146b-5p	KCTD15,ZBTB2
LINC00327	hsa-miR-216b-5p	GABPA,NONO,ANXA10,EDNRA,IL25,QPCTL,SLC22A15,STX16,HK2,SAMD12,TMEM170B,SOWAHC
DSCR10	hsa-miR-761	SLC22A15,SLC9A3R2,NUCB1,DNM1,CD180,TAF1D,KIF21B,CDC42SE1,FAM163A,SLC25A39,CTNNB1,PLA2G3,PNPLA2,HAMP,TRIP10,LY6E,CELSR2,UHMK1,KCTD15,ABR,TULP4,PNPLA6,FLOT2,KLF13,LTF,FBXO17
DSCR10	hsa-miR-3619-5p	LY6E,SLC25A39,KCTD15,TAF1D,PNPLA2,LTF,TRIP10,TULP4,SLC22A15,C1QTNF1,FBXO17,ABR,PLA2G3,HAMP,KLF13,CD180,FAM163A,FLOT2,CDC42SE1,CTNNB1,DNM1,CELSR2,UHMK1,NUCB1,KIF21B,PNPLA6,SLC9A3R2
DSCR10	hsa-miR-375	KIAA0232,CBX3,APPL2,ZNF785,CNN3,NXT2,HOMER2,ANKRD1,HK2,SET,USP10
DSCR10	hsa-miR-129-5p	EP300,LCN10,ZNF281,STAT1,SMKR1,PCDH19,RAB33B,CNN3,USP10,NR3C2,PSMB9,NPM3,IL17RB,VLDLR,TULP4,ETV1,STRN3,F13A1,ITIH5,PDPK1,KIAA0232,POLR3E,NXT2,PMEPA1,OTUD6B,BACH2,SLC43A3,CCDC170,HIPK1,ZNF571,TTYH1,ZNF793,HNRNPL,APOLD1,EI24,RANGAP1,MKNK2
DSCR10	hsa-miR-490-3p	KLF13,UHMK1,RAB33B,ERRFI1,ZNF490,ZBTB2
AP000347	hsa-miR-135a-5p	NR3C2,YBX2,SIRT1,NBEA,PDGFA,DCLK1,CENPB,CCDC170,VLDLR,RAB33B,SLC9A3R2
AP000347	hsa-miR-142-3p	POLI,SYT4,ZBTB41,KIAA0232,AKT1S1,STRN3,SGK1,INPP5A,ARL15,BACH2,ACVR2A,HMGA1,YWHAE,CNN3,CTNNB1
AP000347	hsa-miR-22-3p	SIRT1,BSG,ARFIP2,DDIT4,EP300,HIPK1,OTUD6B,
AP000347	hsa-miR-24-3p	STRN3,PCDHB2,ATP6V1A,STX16,TRIB3,DARS,HECTD3,OAS2,RAB3IL1,CYP11B2,GPC4,KIF21B,ZNF708,ZNF281,USP10,USP18,RAB8A,PDPK1,ZNF490,MAPKAPK2,QPCTL,IGF2R,BNIP3L,STX5,TXNDC16,VAV1,YBX2,ZNF317,LENEP,CCDC58,NCSTN,APPL2,SUSD2,S1PR1,KLHDC3,HIPK1
AP000347	hsa-miR-338-3p	TSPYL4,CDC42SE1,WNT9A,CELSR2,CYP27B1,KCNA4,CC2D2B,FAAH2,PLA2G3,MAP2
AP000347	hsa-miR-125a-5p	STAT1,CDC42SE1,IL16,EDEM1,KCTD15,HK2,GPC4,KLF13,FLOT2,MKNK2,MLF2,TNFSF4,SLC35A4,ALPK3
AP000347	hsa-miR-125b-5p	STAT1,EDEM1,ALPK3,MLF2,MKNK2,HK2,IL16,GPC4,CDC42SE1,C1orf109,TNFSF4,SLC35A4,KLF13,KCTD15,FLOT2
AP000347	hsa-miR-490-3p	KLF13,UHMK1,RAB33B,ERRFI1,ZNF490,ZBTB2
MYLK-AS1	hsa-miR-206	ZNF281,WBP2,CCL2,ATP6V1A,MET,BMP3,NBEA,EYA4,E2F5,PDGFA,CCDC170,UHMK1,ZNF516,NXT2,BACH2,CDC42SE1,CNN3,VAMP2,KLF13,SOWAHC,CPED1,SMKR1,DLG4,CXCL6
MYLK-AS1	hsa-miR-613	BACH2,CNN3,ATP6V1A,WBP2,CCL2,SMKR1,SOWAHC,NXT2,NBEA,CPED1,VAMP2,ZNF516,DLG4,BMP3,E2F5,PDGFA,CCDC170,CDC42SE1,EYA4,UHMK1,ZNF281,CXCL6,KLF13
MYLK-AS1	hsa-miR-217	ZNF708,SLC4A2,UBXN11,DACT1,C11orf87,CHPF,ATP6V1A,ZNF317,ACKR3,TXNDC16,BACH2,NAP1L2,RAB11B,NEXN,SIRT1,HOMER2,TMEM170B,TAF1D,ZNF490
MYLK-AS1	hsa-miR-449c-5p	MET,PXDN,ERLIN1,ZNF546,FLOT2,GABPA,ANKRD12,TSPYL4,ZNF317
AC017002	hsa-miR-142-3p	POLI,SYT4,ZBTB41,KIAA0232,AKT1S1,STRN3,SGK1,INPP5A,ARL15,BACH2,ACVR2A,HMGA1,YWHAE,CNN3,CTNNB1
AC017002	hsa-miR-761	SLC22A15,SLC9A3R2,NUCB1,DNM1,CD180,TAF1D,KIF21B,CDC42SE1,FAM163A,SLC25A39,CTNNB1,PLA2G3,PNPLA2,HAMP,TRIP10,LY6E,CELSR2,UHMK1,KCTD15,ABR,TULP4,PNPLA6,FLOT2,KLF13,LTF,FBXO17
AC017002	hsa-miR-3619-5p	LY6E,SLC25A39,KCTD15,TAF1D,PNPLA2,LTF,TRIP10,TULP4,SLC22A15,C1QTNF1,FBXO17,ABR,PLA2G3,HAMP,KLF13,CD180,FAM163A,FLOT2,CDC42SE1,CTNNB1,DNM1,CELSR2,UHMK1,NUCB1,KIF21B,PNPLA6,SLC9A3R2
AC017002	hsa-miR-23b-3p	TSPYL4,C6orf62,ZBTB2,NLGN4X,INPP5A,PCDH19,MET,SOWAHC,PLAU,SYT4,RALYL,STAT1,WBP2,PDE4B,ZNF793,ZDBF2,BNIP3L,SGK1,PKIA,PDPK1,ETV1,EGR3
AC017002	hsa-miR-338-3p	TSPYL4,CDC42SE1,WNT9A,CELSR2,CYP27B1,KCNA4,CC2D2B,FAAH2,PLA2G3,MAP2
AC017002	hsa-miR-449c-5p	MET,PXDN,ERLIN1,ZNF546,FLOT2,GABPA,ANKRD12,TSPYL4,ZNF317
AC017002	hsa-miR-10a-5p	BACH2,TMEM170B,NONO
CECR3	hsa-miR-139-5p	UHMK1,PSPH,STX16,ARL15,C3orf70,HIPK1,DDIT4,MAP2,AXL,NME7,JDP2,ARHGAP32,TAF1D
CECR3	hsa-miR-193a-3p	FLI1,STX16,ETV1,PLAU,JMY,SRSF6,AP2M1,FAT4
CECR3	hsa-miR-206	ZNF281,WBP2,CCL2,ATP6V1A,MET,BMP3,NBEA,EYA4,E2F5,PDGFA,CCDC170,UHMK1,ZNF516,NXT2,BACH2,CDC42SE1,CNN3,VAMP2,KLF13,SOWAHC,CPED1,SMKR1,DLG4,CXCL6
CECR3	hsa-miR-613	BACH2,CNN3,ATP6V1A,WBP2,CCL2,SMKR1,SOWAHC,NXT2,NBEA,CPED1,VAMP2,ZNF516,DLG4,BMP3,E2F5,PDGFA,CCDC170,CDC42SE1,EYA4,UHMK1,ZNF281,CXCL6,KLF13
CECR3	hsa-miR-761	SLC22A15,SLC9A3R2,NUCB1,DNM1,CD180,TAF1D,KIF21B,CDC42SE1,FAM163A,SLC25A39,CTNNB1,PLA2G3,PNPLA2,HAMP,TRIP10,LY6E,CELSR2,UHMK1,KCTD15,ABR,TULP4,PNPLA6,FLOT2,KLF13,LTF,FBXO17
CECR3	hsa-miR-3619-5p	LY6E,SLC25A39,KCTD15,TAF1D,PNPLA2,LTF,TRIP10,TULP4,SLC22A15,C1QTNF1,FBXO17,ABR,PLA2G3,HAMP,KLF13,CD180,FAM163A,FLOT2,CDC42SE1,CTNNB1,DNM1,CELSR2,UHMK1,NUCB1,KIF21B,PNPLA6,SLC9A3R2
CECR3	hsa-miR-22-3p	SIRT1,BSG,ARFIP2,DDIT4,EP300,HIPK1,OTUD6B,
CECR3	hsa-miR-23b-3p	TSPYL4,C6orf62,ZBTB2,NLGN4X,INPP5A,PCDH19,MET,SOWAHC,PLAU,SYT4,RALYL,STAT1,WBP2,PDE4B,ZNF793,ZDBF2,BNIP3L,SGK1,PKIA,PDPK1,ETV1,EGR3
CECR3	hsa-miR-363-3p	CLEC3A,ANKRD12,ASB5,S1PR1,TULP4,RGS17,FKBP9,C6orf62,STRN3,OTUD6B,DDIT4,ITGA5,MKNK2,JMY,FAAH2,HIPK1,PMEPA1,SPRR2B,TRHDE,EDEM1
CECR3	hsa-miR-107	FAT4,FLOT2,TRAPPC1,TK1,SOWAHC,FOXC1,ENPP4,PCSK5,FGFRL1,CD180,ITGA2,EI24,APLN,TULP4,CELSR2,CCDC85C,FAM9C,CCDC178,PATE2,BACH2,FZD3
CECR3	hsa-miR-338-3p	TSPYL4,CDC42SE1,WNT9A,CELSR2,CYP27B1,KCNA4,CC2D2B,FAAH2,PLA2G3,MAP2
CECR3	hsa-miR-425-5p	RGSL1,PCDHB5,ANKRD1,PLD6,CXCL6
CECR3	hsa-miR-129-5p	EP300,LCN10,ZNF281,STAT1,SMKR1,PCDH19,RAB33B,CNN3,USP10,NR3C2,PSMB9,NPM3,IL17RB,VLDLR,TULP4,ETV1,STRN3,F13A1,ITIH5,PDPK1,KIAA0232,POLR3E,NXT2,PMEPA1,OTUD6B,BACH2,SLC43A3,CCDC170,HIPK1,ZNF571,TTYH1,ZNF793,HNRNPL,APOLD1,EI24,RANGAP1,MKNK2
CECR3	hsa-miR-490-3p	KLF13,UHMK1,RAB33B,ERRFI1,ZNF490,ZBTB2
AC073321	hsa-miR-507	STRN3,EI24,BACH2,KIAA0232,RAB12,GPC4,SKI,FAM86C1,LCN10,STAT1,FAM9C,GSTM4,CASQ2,PCDH19
AC010145	hsa-miR-216b-5p	GABPA,NONO,ANXA10,EDNRA,IL25,QPCTL,SLC22A15,STX16,HK2,SAMD12,TMEM170B,SOWAHC
AC010145	hsa-miR-490-3p	KLF13,UHMK1,RAB33B,ERRFI1,ZNF490,ZBTB2
AC008088	hsa-miR-135a-5p	NR3C2,YBX2,SIRT1,NBEA,PDGFA,DCLK1,CENPB,CCDC170,VLDLR,RAB33B,SLC9A3R2
AC008088	hsa-miR-137	CDCP1,JDP2,JMY,RAB11B,MAPKAPK2,SPATA16,NXT2,SLC35A4,SGCG,FZD3,INPP5A,C11orf87,CLEC3A,BNIP3L,ANKRD12,FOXC1,UNC79,SRSF6,LZTS3,STAT1,ENPP4,SKI,NBEA,MBNL2,SLC6A9,IFIT3,CD83,ZNF516,CALCOCO1,APPL2
AC008088	hsa-miR-139-5p	UHMK1,PSPH,STX16,ARL15,C3orf70,HIPK1,DDIT4,MAP2,AXL,NME7,JDP2,ARHGAP32,TAF1D
AC008088	hsa-miR-142-3p	POLI,SYT4,ZBTB41,KIAA0232,AKT1S1,STRN3,SGK1,INPP5A,ARL15,BACH2,ACVR2A,HMGA1,YWHAE,CNN3,CTNNB1
AC008088	hsa-miR-4458	HMGA1
AC008088	hsa-miR-4500	HMGA1
AC008088	hsa-miR-216b-5p	GABPA,NONO,ANXA10,EDNRA,IL25,QPCTL,SLC22A15,STX16,HK2,SAMD12,TMEM170B,SOWAHC
AC008088	hsa-miR-508-3p	ANXA10,TECTB,NONO,DCLK1,RGS17,RAB12,CNN3,FLOT2
AC008088	hsa-miR-23b-3p	TSPYL4,C6orf62,ZBTB2,NLGN4X,INPP5A,PCDH19,MET,SOWAHC,PLAU,SYT4,RALYL,STAT1,WBP2,PDE4B,ZNF793,ZDBF2,BNIP3L,SGK1,PKIA,PDPK1,ETV1,EGR3
AC008088	hsa-miR-27a-3p	STX16,EDNRA,ATP6V1A,TMEM170B,FBXO46,MKNK2,INSM2,RNGTT,NXT2,ITGA5,KCNA4,PDPK1,NEUROD6,PKIA,CNN3,EYA4,MET,MBNL2
AC008088	hsa-miR-375	KIAA0232,CBX3,APPL2,ZNF785,CNN3,NXT2,HOMER2,ANKRD1,HK2,SET,USP10
MALAT1	hsa-miR-507	STRN3,EI24,BACH2,KIAA0232,RAB12,GPC4,SKI,FAM86C1,LCN10,STAT1,FAM9C,GSTM4,CASQ2,PCDH19
MALAT1	hsa-miR-135a-5p	NR3C2,YBX2,SIRT1,NBEA,PDGFA,DCLK1,CENPB,CCDC170,VLDLR,RAB33B,SLC9A3R2
MALAT1	hsa-miR-140-5p	STRN3,CREB3L1,NCSTN,EP300,DLST,STAT1
MALAT1	hsa-miR-876-3p	TMEM170B,TRIM21,FABP2,ZDBF2,KCTD15,YWHAE,IFIT3,ELSPBP1,FAT1,CDCP1
MALAT1	hsa-miR-1244	ACVR2A,VLDLR,PPP3R1,RNGTT,H2AFY2,TRHDE,DAPK1,CDK17
MALAT1	hsa-miR-142-3p	POLI,SYT4,ZBTB41,KIAA0232,AKT1S1,STRN3,SGK1,INPP5A,ARL15,BACH2,ACVR2A,HMGA1,YWHAE,CNN3,CTNNB1
MALAT1	hsa-miR-146b-5p	KCTD15,ZBTB2
MALAT1	hsa-miR-17-5p	VLDLR,SACS,ZNF785,SKI,NBEA,CPNE1,PPP3R1,FAT4,PKIA,TRIP10,SYBU,FOXC1,RAB12,SYT16,ERLIN1,ITGA2,IRF9,NANOS1,ETV1,ANKRD12,E2F5,PXDN,CTSK,FZD3,MKNK2,ABCG4,KIAA0232,PDPK1,TGFB1I1,FAHD1,BNIP3L,SAMD12,KCNK6,S1PR1,SOWAHC,RASSF2,CXCL6,PPP2R1A,CAMK2N2,RANGAP1,CAPRIN2,ZBTB41,PCSK5
MALAT1	hsa-miR-20b-5p	BNIP3L,S1PR1,SAMD12,PPP3R1,ABCG4,VLDLR,CAPRIN2,E2F5,FAT4,RAB12,CAMK2N2,ETV1,SKI,ZBTB41,SOWAHC,PKIA,NBEA,RASSF2,SACS,NANOS1,TRIP10,IRF9,MKNK2,KIAA0232,FZD3,ANKRD12
MALAT1	hsa-miR-518a-3p	ZNF281
MALAT1	hsa-miR-4262	KIF2C,DDIT4,CAPRIN2
MALAT1	hsa-miR-193a-3p	FLI1,STX16,ETV1,PLAU,JMY,SRSF6,AP2M1,FAT4
MALAT1	hsa-miR-206	ZNF281,WBP2,CCL2,ATP6V1A,MET,BMP3,NBEA,EYA4,E2F5,PDGFA,CCDC170,UHMK1,ZNF516,NXT2,BACH2,CDC42SE1,CNN3,VAMP2,KLF13,SOWAHC,CPED1,SMKR1,DLG4,CXCL6
MALAT1	hsa-miR-613	BACH2,CNN3,ATP6V1A,WBP2,CCL2,SMKR1,SOWAHC,NXT2,NBEA,CPED1,VAMP2,ZNF516,DLG4,BMP3,E2F5,PDGFA,CCDC170,CDC42SE1,EYA4,UHMK1,ZNF281,CXCL6,KLF13
MALAT1	hsa-miR-429	ERRFI1,C11orf87,NLGN4X,STX16,STAT1,CPED1,SOWAHC,NOG,DDIT4,IGF2R,C4orf46,AMFR,ZNF304,NYAP1,GABPA,FLI1,TXNDC16,KYNU,EP300,DDIT4L,TES,INSM2,KCTD15,NANOS1,FZD3,TRHDE,CDK17,PKIA,CNN3,DGKA,ARL15,PDPK1,HIPK1,TAF1D,RNGTT,MAP2
MALAT1	hsa-miR-590-5p	IL1B,PRPF39,ARHGAP32,SKP2,PATE2,SKI,BMP3,ZBTB41
MALAT1	hsa-miR-761	SLC22A15,SLC9A3R2,NUCB1,DNM1,CD180,TAF1D,KIF21B,CDC42SE1,FAM163A,SLC25A39,CTNNB1,PLA2G3,PNPLA2,HAMP,TRIP10,LY6E,CELSR2,UHMK1,KCTD15,ABR,TULP4,PNPLA6,FLOT2,KLF13,LTF,FBXO17
MALAT1	hsa-miR-3619-5p	LY6E,SLC25A39,KCTD15,TAF1D,PNPLA2,LTF,TRIP10,TULP4,SLC22A15,C1QTNF1,FBXO17,ABR,PLA2G3,HAMP,KLF13,CD180,FAM163A,FLOT2,CDC42SE1,CTNNB1,DNM1,CELSR2,UHMK1,NUCB1,KIF21B,PNPLA6,SLC9A3R2
MALAT1	hsa-miR-216b-5p	GABPA,NONO,ANXA10,EDNRA,IL25,QPCTL,SLC22A15,STX16,HK2,SAMD12,TMEM170B,SOWAHC
MALAT1	hsa-miR-217	ZNF708,SLC4A2,UBXN11,DACT1,C11orf87,CHPF,ATP6V1A,ZNF317,ACKR3,TXNDC16,BACH2,NAP1L2,RAB11B,NEXN,SIRT1,HOMER2,TMEM170B,TAF1D,ZNF490
MALAT1	hsa-miR-22-3p	SIRT1,BSG,ARFIP2,DDIT4,EP300,HIPK1,OTUD6B,
MALAT1	hsa-miR-23b-3p	TSPYL4,C6orf62,ZBTB2,NLGN4X,INPP5A,PCDH19,MET,SOWAHC,PLAU,SYT4,RALYL,STAT1,WBP2,PDE4B,ZNF793,ZDBF2,BNIP3L,SGK1,PKIA,PDPK1,ETV1,EGR3
MALAT1	hsa-miR-24-3p	STRN3,PCDHB2,ATP6V1A,STX16,TRIB3,DARS,HECTD3,OAS2,RAB3IL1,CYP11B2,GPC4,KIF21B,ZNF708,ZNF281,USP10,USP18,RAB8A,PDPK1,ZNF490,MAPKAPK2,QPCTL,IGF2R,BNIP3L,STX5,TXNDC16,VAV1,YBX2,ZNF317,LENEP,CCDC58,NCSTN,APPL2,SUSD2,S1PR1,KLHDC3,HIPK1
MALAT1	hsa-miR-363-3p	CLEC3A,ANKRD12,ASB5,S1PR1,TULP4,RGS17,FKBP9,C6orf62,STRN3,OTUD6B,DDIT4,ITGA5,MKNK2,JMY,FAAH2,HIPK1,PMEPA1,SPRR2B,TRHDE,EDEM1
MALAT1	hsa-miR-1297	VLDLR,CHEK2,SRSF6,OTUD6B,DLG4,SERPINA10,ZNF516,CHAC1,ERLIN1,ENPP4,DDIT4,SAMD12,SKP2,RALYL,TXNDC16,PPP3R1,PALLD,CPED1,ITGA5,RHCG,DCLK1,DAPK1,TSPYL4,ZNF708,MAP2,SACS,NHS,GPC4,HMGA1,RGS17,PARP14
MALAT1	hsa-miR-4465	SACS,CHAC1
MALAT1	hsa-miR-338-3p	TSPYL4,CDC42SE1,WNT9A,CELSR2,CYP27B1,KCNA4,CC2D2B,FAAH2,PLA2G3,MAP2
MALAT1	hsa-miR-449c-5p	MET,PXDN,ERLIN1,ZNF546,FLOT2,GABPA,ANKRD12,TSPYL4,ZNF317
MALAT1	hsa-miR-375	KIAA0232,CBX3,APPL2,ZNF785,CNN3,NXT2,HOMER2,ANKRD1,HK2,SET,USP10
MALAT1	hsa-miR-425-5p	RGSL1,PCDHB5,ANKRD1,PLD6,CXCL6
MALAT1	hsa-miR-125a-5p	STAT1,CDC42SE1,IL16,EDEM1,KCTD15,HK2,GPC4,KLF13,FLOT2,MKNK2,MLF2,TNFSF4,SLC35A4,ALPK3
MALAT1	hsa-miR-125b-5p	STAT1,EDEM1,ALPK3,MLF2,MKNK2,HK2,IL16,GPC4,CDC42SE1,C1orf109,TNFSF4,SLC35A4,KLF13,KCTD15,FLOT2
MALAT1	hsa-miR-455-5p	FKBP9,HNRNPL,RASSF2,NCSTN,TRPV2,PATE2,POLI
MALAT1	hsa-miR-129-5p	EP300,LCN10,ZNF281,STAT1,SMKR1,PCDH19,RAB33B,CNN3,USP10,NR3C2,PSMB9,NPM3,IL17RB,VLDLR,TULP4,ETV1,STRN3,F13A1,ITIH5,PDPK1,KIAA0232,POLR3E,NXT2,PMEPA1,OTUD6B,BACH2,SLC43A3,CCDC170,HIPK1,ZNF571,TTYH1,ZNF793,HNRNPL,APOLD1,EI24,RANGAP1,MKNK2
MALAT1	hsa-miR-490-3p	KLF13,UHMK1,RAB33B,ERRFI1,ZNF490,ZBTB2
AC106801	hsa-miR-135a-5p	NR3C2,YBX2,SIRT1,NBEA,PDGFA,DCLK1,CENPB,CCDC170,VLDLR,RAB33B,SLC9A3R2
AC106801	hsa-miR-146b-5p	KCTD15,ZBTB2
AC106801	hsa-miR-4262	KIF2C,DDIT4,CAPRIN2
AC106801	hsa-miR-590-5p	IL1B,PRPF39,ARHGAP32,SKP2,PATE2,SKI,BMP3,ZBTB41
AC106801	hsa-miR-23b-3p	TSPYL4,C6orf62,ZBTB2,NLGN4X,INPP5A,PCDH19,MET,SOWAHC,PLAU,SYT4,RALYL,STAT1,WBP2,PDE4B,ZNF793,ZDBF2,BNIP3L,SGK1,PKIA,PDPK1,ETV1,EGR3
AC106801	hsa-miR-24-3p	STRN3,PCDHB2,ATP6V1A,STX16,TRIB3,DARS,HECTD3,OAS2,RAB3IL1,CYP11B2,GPC4,KIF21B,ZNF708,ZNF281,USP10,USP18,RAB8A,PDPK1,ZNF490,MAPKAPK2,QPCTL,IGF2R,BNIP3L,STX5,TXNDC16,VAV1,YBX2,ZNF317,LENEP,CCDC58,NCSTN,APPL2,SUSD2,S1PR1,KLHDC3,HIPK1
AC106801	hsa-miR-363-3p	CLEC3A,ANKRD12,ASB5,S1PR1,TULP4,RGS17,FKBP9,C6orf62,STRN3,OTUD6B,DDIT4,ITGA5,MKNK2,JMY,FAAH2,HIPK1,PMEPA1,SPRR2B,TRHDE,EDEM1
AC106801	hsa-miR-338-3p	TSPYL4,CDC42SE1,WNT9A,CELSR2,CYP27B1,KCNA4,CC2D2B,FAAH2,PLA2G3,MAP2
AC106801	hsa-miR-33a-3p	FAT1,MAP4K2,DCLK1,TMEM170B,KCTD18,CD1C,ETV1,ASB5,ABCD3,E2F5,ANTXR2,KIAA0232,YWHAE,PPP3R1,NXT2,BACH2,DDIT4L,MBNL2,CDK17,BNIP3L,S1PR1
AC106801	hsa-miR-375	KIAA0232,CBX3,APPL2,ZNF785,CNN3,NXT2,HOMER2,ANKRD1,HK2,SET,USP10
AC106801	hsa-miR-125a-5p	STAT1,CDC42SE1,IL16,EDEM1,KCTD15,HK2,GPC4,KLF13,FLOT2,MKNK2,MLF2,TNFSF4,SLC35A4,ALPK3
AC106801	hsa-miR-125b-5p	STAT1,EDEM1,ALPK3,MLF2,MKNK2,HK2,IL16,GPC4,CDC42SE1,C1orf109,TNFSF4,SLC35A4,KLF13,KCTD15,FLOT2
AC106801	hsa-miR-10a-5p	BACH2,TMEM170B,NONO
AC106801	hsa-miR-129-5p	EP300,LCN10,ZNF281,STAT1,SMKR1,PCDH19,RAB33B,CNN3,USP10,NR3C2,PSMB9,NPM3,IL17RB,VLDLR,TULP4,ETV1,STRN3,F13A1,ITIH5,PDPK1,KIAA0232,POLR3E,NXT2,PMEPA1,OTUD6B,BACH2,SLC43A3,CCDC170,HIPK1,ZNF571,TTYH1,ZNF793,HNRNPL,APOLD1,EI24,RANGAP1,MKNK2
AP000462	hsa-miR-17-5p	VLDLR,SACS,ZNF785,SKI,NBEA,CPNE1,PPP3R1,FAT4,PKIA,TRIP10,SYBU,FOXC1,RAB12,SYT16,ERLIN1,ITGA2,IRF9,NANOS1,ETV1,ANKRD12,E2F5,PXDN,CTSK,FZD3,MKNK2,ABCG4,KIAA0232,PDPK1,TGFB1I1,FAHD1,BNIP3L,SAMD12,KCNK6,S1PR1,SOWAHC,RASSF2,CXCL6,PPP2R1A,CAMK2N2,RANGAP1,CAPRIN2,ZBTB41,PCSK5
AP000462	hsa-miR-20b-5p	BNIP3L,S1PR1,SAMD12,PPP3R1,ABCG4,VLDLR,CAPRIN2,E2F5,FAT4,RAB12,CAMK2N2,ETV1,SKI,ZBTB41,SOWAHC,PKIA,NBEA,RASSF2,SACS,NANOS1,TRIP10,IRF9,MKNK2,KIAA0232,FZD3,ANKRD12
AP000462	hsa-miR-518a-3p	ZNF281
AP000462	hsa-miR-590-5p	IL1B,PRPF39,ARHGAP32,SKP2,PATE2,SKI,BMP3,ZBTB41
AP000462	hsa-miR-1297	VLDLR,CHEK2,SRSF6,OTUD6B,DLG4,SERPINA10,ZNF516,CHAC1,ERLIN1,ENPP4,DDIT4,SAMD12,SKP2,RALYL,TXNDC16,PPP3R1,PALLD,CPED1,ITGA5,RHCG,DCLK1,DAPK1,TSPYL4,ZNF708,MAP2,SACS,NHS,GPC4,HMGA1,RGS17,PARP14
AP000462	hsa-miR-4465	SACS,CHAC1
AP000462	hsa-miR-507	STRN3,EI24,BACH2,KIAA0232,RAB12,GPC4,SKI,FAM86C1,LCN10,STAT1,FAM9C,GSTM4,CASQ2,PCDH19
AP000462	hsa-miR-206	ZNF281,WBP2,CCL2,ATP6V1A,MET,BMP3,NBEA,EYA4,E2F5,PDGFA,CCDC170,UHMK1,ZNF516,NXT2,BACH2,CDC42SE1,CNN3,VAMP2,KLF13,SOWAHC,CPED1,SMKR1,DLG4,CXCL6
AP000462	hsa-miR-613	BACH2,CNN3,ATP6V1A,WBP2,CCL2,SMKR1,SOWAHC,NXT2,NBEA,CPED1,VAMP2,ZNF516,DLG4,BMP3,E2F5,PDGFA,CCDC170,CDC42SE1,EYA4,UHMK1,ZNF281,CXCL6,KLF13
AP000462	hsa-miR-22-3p	SIRT1,BSG,ARFIP2,DDIT4,EP300,HIPK1,OTUD6B,
AP000462	hsa-miR-24-3p	STRN3,PCDHB2,ATP6V1A,STX16,TRIB3,DARS,HECTD3,OAS2,RAB3IL1,CYP11B2,GPC4,KIF21B,ZNF708,ZNF281,USP10,USP18,RAB8A,PDPK1,ZNF490,MAPKAPK2,QPCTL,IGF2R,BNIP3L,STX5,TXNDC16,VAV1,YBX2,ZNF317,LENEP,CCDC58,NCSTN,APPL2,SUSD2,S1PR1,KLHDC3,HIPK1
AP000462	hsa-miR-449c-5p	MET,PXDN,ERLIN1,ZNF546,FLOT2,GABPA,ANKRD12,TSPYL4,ZNF317
AP000462	hsa-miR-4458	HMGA1
AP000462	hsa-miR-4500	HMGA1
AP000462	hsa-miR-508-3p	ANXA10,TECTB,NONO,DCLK1,RGS17,RAB12,CNN3,FLOT2
LINC00520	hsa-miR-135a-5p	NR3C2,YBX2,SIRT1,NBEA,PDGFA,DCLK1,CENPB,CCDC170,VLDLR,RAB33B,SLC9A3R2
LINC00520	hsa-miR-142-3p	POLI,SYT4,ZBTB41,KIAA0232,AKT1S1,STRN3,SGK1,INPP5A,ARL15,BACH2,ACVR2A,HMGA1,YWHAE,CNN3,CTNNB1
LINC00520	hsa-miR-17-5p	VLDLR,SACS,ZNF785,SKI,NBEA,CPNE1,PPP3R1,FAT4,PKIA,TRIP10,SYBU,FOXC1,RAB12,SYT16,ERLIN1,ITGA2,IRF9,NANOS1,ETV1,ANKRD12,E2F5,PXDN,CTSK,FZD3,MKNK2,ABCG4,KIAA0232,PDPK1,TGFB1I1,FAHD1,BNIP3L,SAMD12,KCNK6,S1PR1,SOWAHC,RASSF2,CXCL6,PPP2R1A,CAMK2N2,RANGAP1,CAPRIN2,ZBTB41,PCSK5
LINC00520	hsa-miR-20b-5p	BNIP3L,S1PR1,SAMD12,PPP3R1,ABCG4,VLDLR,CAPRIN2,E2F5,FAT4,RAB12,CAMK2N2,ETV1,SKI,ZBTB41,SOWAHC,PKIA,NBEA,RASSF2,SACS,NANOS1,TRIP10,IRF9,MKNK2,KIAA0232,FZD3,ANKRD12
LINC00520	hsa-miR-518a-3p	ZNF281
LINC00520	hsa-miR-4262	KIF2C,DDIT4,CAPRIN2
LINC00520	hsa-miR-4458	HMGA1
LINC00520	hsa-miR-4500	HMGA1
LINC00520	hsa-miR-216b-5p	GABPA,NONO,ANXA10,EDNRA,IL25,QPCTL,SLC22A15,STX16,HK2,SAMD12,TMEM170B,SOWAHC
LINC00520	hsa-miR-217	ZNF708,SLC4A2,UBXN11,DACT1,C11orf87,CHPF,ATP6V1A,ZNF317,ACKR3,TXNDC16,BACH2,NAP1L2,RAB11B,NEXN,SIRT1,HOMER2,TMEM170B,TAF1D,ZNF490
LINC00520	hsa-miR-23b-3p	TSPYL4,C6orf62,ZBTB2,NLGN4X,INPP5A,PCDH19,MET,SOWAHC,PLAU,SYT4,RALYL,STAT1,WBP2,PDE4B,ZNF793,ZDBF2,BNIP3L,SGK1,PKIA,PDPK1,ETV1,EGR3
LINC00520	hsa-miR-24-3p	STRN3,PCDHB2,ATP6V1A,STX16,TRIB3,DARS,HECTD3,OAS2,RAB3IL1,CYP11B2,GPC4,KIF21B,ZNF708,ZNF281,USP10,USP18,RAB8A,PDPK1,ZNF490,MAPKAPK2,QPCTL,IGF2R,BNIP3L,STX5,TXNDC16,VAV1,YBX2,ZNF317,LENEP,CCDC58,NCSTN,APPL2,SUSD2,S1PR1,KLHDC3,HIPK1
LINC00520	hsa-miR-375	KIAA0232,CBX3,APPL2,ZNF785,CNN3,NXT2,HOMER2,ANKRD1,HK2,SET,USP10
LINC00520	hsa-miR-125a-5p	STAT1,CDC42SE1,IL16,EDEM1,KCTD15,HK2,GPC4,KLF13,FLOT2,MKNK2,MLF2,TNFSF4,SLC35A4,ALPK3
LINC00520	hsa-miR-125b-5p	STAT1,EDEM1,ALPK3,MLF2,MKNK2,HK2,IL16,GPC4,CDC42SE1,C1orf109,TNFSF4,SLC35A4,KLF13,KCTD15,FLOT2
LINC00520	hsa-miR-129-5p	EP300,LCN10,ZNF281,STAT1,SMKR1,PCDH19,RAB33B,CNN3,USP10,NR3C2,PSMB9,NPM3,IL17RB,VLDLR,TULP4,ETV1,STRN3,F13A1,ITIH5,PDPK1,KIAA0232,POLR3E,NXT2,PMEPA1,OTUD6B,BACH2,SLC43A3,CCDC170,HIPK1,ZNF571,TTYH1,ZNF793,HNRNPL,APOLD1,EI24,RANGAP1,MKNK2
AC008088	hsa-miR-301b-3p	NR3C2,PMEPA1,MET,BMP3,CAPRIN2,ENPP4,RASSF2,PXDN,KCNA4,TNF,ANKRD12,JMY,S1PR1,SYBU,TMEM170B
AC008088	hsa-miR-4295	CAPRIN2,ENPP4,JMY
AC008088	hsa-miR-3666	CAPRIN2,ENPP4,JMY
AC008088	hsa-miR-4262	KIF2C,DDIT4,CAPRIN2
AC008088	hsa-miR-10a-5p	BACH2,TMEM170B,NONO
