# Supplementary material for: lncRNA MALAT1 mediates osteogenic differentiation of bone mesenchymal stem cells by sponging miR-129-5p
Source: PeerJ. 2022 Apr 22;10:e13355. doi: 10.7717/peerj.13355 (PMC9037136; doi:10.7717/peerj.13355)
Supplement: Supplemental Information 4 [file peerj-10-13355-s004.xlsx]

## Sheet: Sheet1
Additional file 4. The enriched Gene ontology(GO) terms of linked mRNAs in the ceRNA network
Number	Category	Term	Count	%	P-Value	Genes
1	GOTERM_CC_DIRECT	GO:0005925~focal adhesion	21	7.47331	1.03957e-06	BSG, CNN3, FLOT2, ITGA2, NHS, PALLD, NEXN, SLC9A3R2, YWHAE, HMGA1, CTNNB1, NCSTN, PDPK1, ITGA5, IGF2R, FAT1, STX16, SLC4A2, TGFB1I1, PLAU, TES
2	GOTERM_MF_DIRECT	GO:0005515~protein binding	162	57.6512	0.000154585	NOG, JDP2, SYT4, PDGFA, CBX3, RANGAP1, ANKRD1, CTNNB1, NONO, ZNF304, C1ORF109, GSTM4, FLI1, CREB3L1, BSG, POLI, DARS, CHAC1, PLD6, STRN3, GABPA, SKP2, PKIA, NME7, FAM86C1, EP300, FBXO17, ZNF785, RAB12, TGFB1I1, AMFR, VAMP2, PRDM1, RALYL, MAP4K2, KCNA4, CHEK2, MAPKAPK2, OAS2, UHMK1, TK1, HNRNPL, AKT1S1, STX16, SYBU, NPM3, HECTD3, AP2M1, FBXO46, UBXN11, RAB8A, KLF13, MET, ARFIP2, ITGA2, SKI, HOMER2…
3	GOTERM_BP_DIRECT	GO:0042771~intrinsic apoptotic signaling pathway in response to DNA damage by p53 class mediator	5	1.77936	0.00114971	EP300, HIPK1, CHEK2, SIRT1, DDIT4
4	GOTERM_BP_DIRECT	GO:0043122~regulation of I-kappaB kinase/NF-kappaB signaling	4	1.42349	0.00134486	PDPK1, TNF, CPNE1, IL1B
5	GOTERM_CC_DIRECT	GO:0014069~postsynaptic density	10	3.55872	0.00140763	LZTS3, RAB8A, PDPK1, ARHGAP32, CNN3, PDE4B, NLGN4X, DLG4, HOMER2, DCLK1
6	GOTERM_BP_DIRECT	GO:0071222~cellular response to lipopolysaccharide	8	2.84698	0.00161571	TNF, CCL2, TNFSF4, HAMP, PDE4B, AXL, ANKRD1, CD180
7	GOTERM_BP_DIRECT	GO:0009887~organ morphogenesis	7	2.4911	0.0026692	FLI1, CCL2, EP300, E2F5, PDGFA, ITGA2, PNPLA6
8	GOTERM_BP_DIRECT	GO:0045944~positive regulation of transcription from RNA polymerase II promoter	27	9.60854	0.00369245	NOG, TNF, E2F5, PPP3R1, ANKRD1, CALCOCO1, WBP2, CTNNB1, ZNF304, S1PR1, FLI1, CREB3L1, ETV1, IL1B, KLF13, STRN3, GABPA, MET, IL25, SKI, HMGA1, SIRT1, CAPRIN2, ACVR2A, EP300, FOXC1, NEUROD6
9	GOTERM_MF_DIRECT	GO:0044212~transcription regulatory region DNA binding	10	3.55872	0.00404336	HNRNPL, ZNF281, ZNF516, TNF, GABPA, H2AFY2, CREB3L1, FOXC1, CALCOCO1, CTNNB1
10	GOTERM_CC_DIRECT	GO:0009986~cell surface	17	6.04982	0.00442225	TNF, TNFSF4, PDGFA, TRPV2, MET, AXL, ITGA2, FZD3, ACKR3, IL17RB, ELSPBP1, ACVR2A, ITGA5, IGF2R, NLGN4X, LTF, PLAU
Note: Term: the name of GO term; P-value: the P value obtained from the significant difference test.
