# Supplementary material for: lncRNA MALAT1 mediates osteogenic differentiation of bone mesenchymal stem cells by sponging miR-129-5p
Source: PeerJ. 2022 Apr 22;10:e13355. doi: 10.7717/peerj.13355 (PMC9037136; doi:10.7717/peerj.13355)
Supplement: Supplemental Information 5 [file peerj-10-13355-s005.xlsx]

## Sheet: Sheet1
Additional file 5. The enriched pathway terms of linked mRNA in the ceRNA network
Number	Category	Term	Count	P-Value	Enrichment score
1	KEGG_PATHWAY	hsa04350:TGF-beta signaling pathway	6	0.00795006	2.09963
2	KEGG_PATHWAY	hsa05205:Proteoglycans in cancer	9	0.00941887	2.026
3	KEGG_PATHWAY	hsa05323:Rheumatoid arthritis	6	0.0096317	2.0163
4	KEGG_PATHWAY	hsa04152:AMPK signaling pathway	7	0.00964245	2.01581
5	KEGG_PATHWAY	hsa04068:FoxO signaling pathway	7	0.0143069	1.84446
6	KEGG_PATHWAY	hsa05168:Herpes simplex infection	8	0.0186054	1.73036
7	KEGG_PATHWAY	hsa04960:Aldosterone-regulated sodium reabsorption	4	0.0196602	1.70641
8	KEGG_PATHWAY	hsa04060:Cytokine-cytokine receptor interaction	9	0.0273334	1.56331
9	KEGG_PATHWAY	hsa05144:Malaria	4	0.0356597	1.44782
10	KEGG_PATHWAY	hsa04640:Hematopoietic cell lineage	5	0.0397875	1.40025
11	KEGG_PATHWAY	hsa05215:Prostate cancer	5	0.0412234	1.38486
12	KEGG_PATHWAY	hsa05164:Influenza A	7	0.044073	1.35583
Note: P-value: the P value obtained from the significant difference test; enrichment score: the enrichment score of the pathway, which was accounted by -log 10(P-value).
