# Supplementary material for: lncRNA MALAT1 mediates osteogenic differentiation of bone mesenchymal stem cells by sponging miR-129-5p
Source: PeerJ. 2022 Apr 22;10:e13355. doi: 10.7717/peerj.13355 (PMC9037136; doi:10.7717/peerj.13355)
Supplement: Supplemental Information 8 [file peerj-10-13355-s008.xlsx]

## Sheet: Sheet1
Category	Term	Count	%	PValue	Genes	List Total	Pop Hits	Pop Total	Fold Enrichment
GOTERM_CC_DIRECT	GO:0005925~focal adhesion	21	7.47331	1.03957e-06	BSG, CNN3, FLOT2, ITGA2, NHS, PALLD, NEXN, SLC9A3R2, YWHAE, HMGA1, CTNNB1, NCSTN, PDPK1, ITGA5, IGF2R, FAT1, STX16, SLC4A2, TGFB1I1, PLAU, TES	263	391	18224	3.72161
GOTERM_MF_DIRECT	GO:0005515~protein binding	162	57.6512	0.000154585	NOG, JDP2, SYT4, PDGFA, CBX3, RANGAP1, ANKRD1, CTNNB1, NONO, ZNF304, C1ORF109, GSTM4, FLI1, CREB3L1, BSG, POLI, DARS, CHAC1, PLD6, STRN3, GABPA, SKP2, PKIA, NME7, FAM86C1, EP300, FBXO17, ZNF785, RAB12, TGFB1I1, AMFR, VAMP2, PRDM1, RALYL, MAP4K2, KCNA4, CHEK2, MAPKAPK2, OAS2, UHMK1, TK1, HNRNPL, AKT1S1, STX16, SYBU, NPM3, HECTD3, AP2M1, FBXO46, UBXN11, RAB8A, KLF13, MET, ARFIP2, ITGA2, SKI, HOMER2…	255	8785	16881	1.22076
GOTERM_BP_DIRECT	GO:0042771~intrinsic apoptotic signaling pathway in response to DNA damage by p53 class mediator	5	1.77936	0.00114971	EP300, HIPK1, CHEK2, SIRT1, DDIT4	254	31	16792	10.6629
GOTERM_BP_DIRECT	GO:0043122~regulation of I-kappaB kinase/NF-kappaB signaling	4	1.42349	0.00134486	PDPK1, TNF, CPNE1, IL1B	254	15	16792	17.6294
GOTERM_CC_DIRECT	GO:0014069~postsynaptic density	10	3.55872	0.00140763	LZTS3, RAB8A, PDPK1, ARHGAP32, CNN3, PDE4B, NLGN4X, DLG4, HOMER2, DCLK1	263	184	18224	3.76591
GOTERM_BP_DIRECT	GO:0071222~cellular response to lipopolysaccharide	8	2.84698	0.00161571	TNF, CCL2, TNFSF4, HAMP, PDE4B, AXL, ANKRD1, CD180	254	113	16792	4.68037
GOTERM_BP_DIRECT	GO:0009887~organ morphogenesis	7	2.4911	0.0026692	FLI1, CCL2, EP300, E2F5, PDGFA, ITGA2, PNPLA6	254	92	16792	5.03013
GOTERM_BP_DIRECT	GO:0045944~positive regulation of transcription from RNA polymerase II promoter	27	9.60854	0.00369245	NOG, TNF, E2F5, PPP3R1, ANKRD1, CALCOCO1, WBP2, CTNNB1, ZNF304, S1PR1, FLI1, CREB3L1, ETV1, IL1B, KLF13, STRN3, GABPA, MET, IL25, SKI, HMGA1, SIRT1, CAPRIN2, ACVR2A, EP300, FOXC1, NEUROD6	254	981	16792	1.81955
GOTERM_MF_DIRECT	GO:0044212~transcription regulatory region DNA binding	10	3.55872	0.00504336	HNRNPL, ZNF281, ZNF516, TNF, GABPA, H2AFY2, CREB3L1, FOXC1, CALCOCO1, CTNNB1	255	213	16881	3.10798
GOTERM_CC_DIRECT	GO:0009986~cell surface	17	6.04982	0.00542225	TNF, TNFSF4, PDGFA, TRPV2, MET, AXL, ITGA2, FZD3, ACKR3, IL17RB, ELSPBP1, ACVR2A, ITGA5, IGF2R, NLGN4X, LTF, PLAU	263	542	18224	2.17339
GOTERM_CC_DIRECT	GO:0016020~membrane	47	16.726	0.00566928	TNF, QPCTL, SYT4, PDGFA, ENPP4, HK2, OAS2, EDEM1, MLF2, CTNNB1, IL17RB, DGKA, HNRNPL, NONO, KIF2C, PDPK1, FAT4, FAT1, PDE4B, STX16, ABCD3, CREB3L1, SLC4A2, VMP1, INPP5A, PPP2R1A, DLST, STX5, BSG, TRHDE, ABR, DARS, FLOT2, PNPLA2, RGS17, YWHAE, PNPLA6, NUCB1, NCSTN, SLC6A9, EI24, PARP14, IGF2R, CPNE1, VAMP2, AMFR, VLDLR	263	2200	18224	1.48035
GOTERM_BP_DIRECT	GO:0032869~cellular response to insulin stimulus	6	2.13523	0.00610972	RAB8A, PDPK1, CCL2, TRIB3, VAMP2, ERRFI1	254	77	16792	5.15145
GOTERM_MF_DIRECT	GO:0004672~protein kinase activity	13	4.62633	0.00842581	CDK17, CCL2, MET, MKNK2, MAP4K2, TRIB3, MAPKAPK2, CHEK2, DAPK1, PDPK1, HIPK1, RASSF2, DCLK1	255	359	16881	2.39721
GOTERM_CC_DIRECT	GO:0048471~perinuclear region of cytoplasm	18	6.40569	0.00870098	CCL2, SYT4, FLOT2, NANOS1, ITGA2, ACKR3, OAS2, CTNNB1, NXT2, SET, IGF2R, FAT1, STX16, HECTD3, AMFR, VAMP2, TRIP10, APLN	263	621	18224	2.00849
GOTERM_CC_DIRECT	GO:0005886~plasma membrane	77	27.4021	0.00908311	IL16, SYT4, TRPV2, SUSD2, FGFRL1, NBEA, CDCP1, CTNNB1, IL17RB, EDNRA, GPC4, PDPK1, S1PR1, KCNK6, DLG4, SLC4A2, SGK1, BSG, PCDHB5, FLOT2, STRN3, APOLD1, PCDHB2, ACKR3, PNPLA2, PALLD, SLC9A3R2, DAPK1, ACVR2A, CD83, ATP6V1A, SGCG, RHCG, VAMP2, PLA2G3, PMEPA1, TNF, ENPP4, KCNA4, TRIB3, CDC42SE1, DGKA, UNC79, FAT4, FAT1, TTYH1, RAB11B, VMP1, TECTB, INPP5A, AP2M1, TES, RAB8A, ABR, TNFSF4, MET, AXL, ARF…	263	4121	18224	1.29472
GOTERM_BP_DIRECT	GO:0071549~cellular response to dexamethasone stimulus	4	1.42349	0.00924846	CCL2, CBX3, ERRFI1, DDIT4	254	29	16792	9.11865
GOTERM_CC_DIRECT	GO:0005622~intracellular	31	11.032	0.00967468	CCL2, TRPV2, MAP4K2, DGKA, ZNF304, PDPK1, FAT4, ARL15, RAB11B, USP10, ZNF490, INPP5A, DCLK1, ZNF546, STX5, ABR, POLI, AXL, ZNF793, VAV1, RAB33B, DDIT4, TULP4, ZNF317, ZNF785, TGFB1I1, ASB5, NYAP1, ZNF571, CASQ2, C6ORF62	263	1332	18224	1.61267
GOTERM_MF_DIRECT	GO:0003700~transcription factor activity, sequence-specific DNA binding	25	8.8968	0.0104587	ZNF281, ZNF546, EGR3, JDP2, ZNF516, BACH2, E2F5, STRN3, GABPA, NR3C2, ZNF793, VAV1, HMGA1, CTNNB1, IRF9, ZNF304, TULP4, FLI1, ZNF317, ETV1, CREB3L1, FOXC1, PRDM1, ZNF490, ZNF571	255	961	16881	1.72216
GOTERM_CC_DIRECT	GO:0008021~synaptic vesicle	6	2.13523	0.0105439	RAB8A, PDE4B, DLG4, RAB11B, VAMP2, DNM1	263	92	18224	4.51909
GOTERM_BP_DIRECT	GO:0018105~peptidyl-serine phosphorylation	7	2.4911	0.0116759	SGK1, PDPK1, MKNK2, CHEK2, MAPKAPK2, UHMK1, DCLK1	254	125	16792	3.70217
GOTERM_MF_DIRECT	GO:0004674~protein serine/threonine kinase activity	13	4.62633	0.0118486	CDK17, SGK1, ALPK3, MAP4K2, MKNK2, MAPKAPK2, CHEK2, UHMK1, DAPK1, ACVR2A, PDPK1, HIPK1, DCLK1	255	376	16881	2.28883
GOTERM_BP_DIRECT	GO:0006906~vesicle fusion	5	1.77936	0.0119834	STX5, SYT4, STX16, SYT16, VAMP2	254	59	16792	5.60256
GOTERM_BP_DIRECT	GO:0043491~protein kinase B signaling	4	1.42349	0.0132148	TNF, CCL2, AXL, IL1B	254	33	16792	8.01336
GOTERM_BP_DIRECT	GO:0032092~positive regulation of protein binding	5	1.77936	0.013425	DACT1, EP300, TRIB3, AMFR, CAPRIN2	254	61	16792	5.41887
GOTERM_CC_DIRECT	GO:0005802~trans-Golgi network	7	2.4911	0.0138963	NUCB1, CHAC1, IGF2R, STX16, NBEA, VAMP2, TRIP10	263	136	18224	3.56654
GOTERM_BP_DIRECT	GO:0030182~neuron differentiation	6	2.13523	0.014426	S1PR1, HIPK1, NLGN4X, FZD3, WNT9A, DDIT4	254	95	16792	4.17538
GOTERM_MF_DIRECT	GO:0001047~core promoter binding	5	1.77936	0.0157177	ZNF281, NONO, IRF9, EP300, CALCOCO1	255	64	16881	5.17188
GOTERM_BP_DIRECT	GO:0030512~negative regulation of transforming growth factor beta receptor signaling pathway	5	1.77936	0.0157866	PDPK1, SKI, TGFB1I1, SIRT1, PMEPA1	254	64	16792	5.16486
GOTERM_BP_DIRECT	GO:0043065~positive regulation of apoptotic process	11	3.91459	0.0158304	NCSTN, TNF, ABR, IGF2R, RASSF2, BNIP3L, ANKRD1, SIRT1, VAV1, CTNNB1, JMY	254	300	16792	2.42404
GOTERM_BP_DIRECT	GO:0048813~dendrite morphogenesis	4	1.42349	0.0180116	MAP2, CELSR2, DCLK1, VLDLR	254	37	16792	7.14705
GOTERM_BP_DIRECT	GO:0032743~positive regulation of interleukin-2 production	3	1.06762	0.0182615	CD83, TNFSF4, PDE4B	254	14	16792	14.1665
GOTERM_CC_DIRECT	GO:0005913~cell-cell adherens junction	11	3.91459	0.0187916	STX5, BSG, CNN3, FLOT2, ARFIP2, RAB11B, RANGAP1, YWHAE, SLC9A3R2, CTNNB1, TES	263	323	18224	2.35982
GOTERM_BP_DIRECT	GO:0000381~regulation of alternative mRNA splicing, via spliceosome	4	1.42349	0.0193426	HNRNPL, SRSF6, MBNL2, UHMK1	254	38	16792	6.95897
GOTERM_BP_DIRECT	GO:0001525~angiogenesis	9	3.20285	0.0197364	ZNF304, CCL2, S1PR1, PDGFA, ITGA5, APOLD1, ACKR3, SIRT1, PNPLA6	254	223	16792	2.66813
GOTERM_BP_DIRECT	GO:0035690~cellular response to drug	5	1.77936	0.0202724	CCL2, PDE4B, IL1B, CHEK2, ANKRD1	254	69	16792	4.7906
GOTERM_BP_DIRECT	GO:0006468~protein phosphorylation	14	4.98221	0.0211961	CDK17, SGK1, CCL2, ALPK3, MKNK2, MAP4K2, TRIB3, MAPKAPK2, CHEK2, DAPK1, PDPK1, HIPK1, RASSF2, DCLK1	254	456	16792	2.0297
GOTERM_BP_DIRECT	GO:0051091~positive regulation of sequence-specific DNA binding transcription factor activity	6	2.13523	0.0213293	TNF, EP300, IL1B, TRIM21, CTNNB1, JMY	254	105	16792	3.77773
GOTERM_BP_DIRECT	GO:0001764~neuron migration	6	2.13523	0.0213293	AXL, FZD3, YWHAE, DCLK1, CTNNB1, DDIT4	254	105	16792	3.77773
GOTERM_BP_DIRECT	GO:0048010~vascular endothelial growth factor receptor signaling pathway	5	1.77936	0.0233039	CCL2, AXL, FOXC1, MAPKAPK2, VAV1	254	72	16792	4.59099
GOTERM_CC_DIRECT	GO:0030425~dendrite	11	3.91459	0.023567	RAB8A, CCL2, SYT4, STRN3, NLGN4X, SACS, RANGAP1, FZD3, AMFR, HOMER2, KIF21B	263	335	18224	2.27529
GOTERM_BP_DIRECT	GO:0006366~transcription from RNA polymerase II promoter	15	5.33808	0.023746	ZNF516, BACH2, KLF13, GABPA, HMGA1, RNGTT, YBX2, IRF9, EP300, FLI1, ETV1, CREB3L1, FOXC1, TGFB1I1, NEUROD6	254	513	16792	1.93305
GOTERM_MF_DIRECT	GO:0005509~calcium ion binding	19	6.76157	0.0237708	FKBP9, PCDHB5, SYT4, PPP3R1, PCDHB2, CELSR2, PSPH, EDEM1, PCDH19, NUCB1, DGKA, ANXA10, FAT4, FAT1, TTYH1, CPNE1, SYT16, CASQ2, VLDLR	255	717	16881	1.75425
GOTERM_MF_DIRECT	GO:0046982~protein heterodimerization activity	14	4.98221	0.0241711	PPP2R1A, JDP2, PDGFA, FLOT2, GABPA, AXL, ITGA2, YWHAE, HOMER2, ABCG4, CTNNB1, H2AFY2, BNIP3L, SYT16	255	465	16881	1.99312
GOTERM_MF_DIRECT	GO:0005516~calmodulin binding	8	2.84698	0.0244141	CNN3, STRN3, MAP2, PPP3R1, MKNK2, MAPKAPK2, VAMP2, DAPK1	255	189	16881	2.80212
GOTERM_BP_DIRECT	GO:0000122~negative regulation of transcription from RNA polymerase II promoter	19	6.76157	0.0248731	ZNF281, JDP2, NOG, TNF, BACH2, STRN3, GABPA, TRIB3, SKI, ANKRD1, PKIA, SIRT1, CTNNB1, DACT1, EP300, HAMP, H2AFY2, PRDM1, VLDLR	254	720	16792	1.74458
GOTERM_BP_DIRECT	GO:0007566~embryo implantation	4	1.42349	0.0251965	BSG, IL1B, VMP1, PCSK5	254	42	16792	6.29621
GOTERM_BP_DIRECT	GO:0045599~negative regulation of fat cell differentiation	4	1.42349	0.0251965	JDP2, TNF, TRIB3, SIRT1	254	42	16792	6.29621
GOTERM_BP_DIRECT	GO:0009615~response to virus	6	2.13523	0.0254693	IFIT3, TNF, TNFSF4, OAS2, HMGA1, DCLK1	254	110	16792	3.60601
GOTERM_BP_DIRECT	GO:0006955~immune response	13	4.62633	0.0260785	PXDN, TNF, TNFSF4, CCL2, IL16, SUSD2, MAP4K2, OAS2, CXCL6, VAV1, HAMP, IL1B, APLN	254	421	16792	2.04141
GOTERM_BP_DIRECT	GO:0031589~cell-substrate adhesion	3	1.06762	0.0264968	ITGA5, TTYH1, ITGA2	254	17	16792	11.6665
GOTERM_BP_DIRECT	GO:1900034~regulation of cellular response to heat	5	1.77936	0.0265966	AKT1S1, EP300, MAPKAPK2, SIRT1, YWHAE	254	75	16792	4.40735
GOTERM_BP_DIRECT	GO:0061025~membrane fusion	4	1.42349	0.0284414	STX5, STX16, VAMP2, DNM1	254	44	16792	6.01002
GOTERM_MF_DIRECT	GO:0019905~syntaxin binding	5	1.77936	0.028818	SYT4, STX16, HECTD3, SYT16, VAMP2	255	77	16881	4.2987
GOTERM_BP_DIRECT	GO:0006355~regulation of transcription, DNA-templated	33	11.7438	0.029312	IL16, TAF1D, NR3C2, CHEK2, MLF2, YBX2, NONO, ZNF304, PDPK1, ZNF708, ZNF490, ZNF546, PPP2R1A, INSM2, EGR3, ZBTB41, CELSR2, ZNF793, HMGA1, VAV1, IRF9, EYA4, TULP4, EP300, HIPK1, ZNF317, PARP14, ZNF785, CPNE1, ZBTB2, FOXC1, NEUROD6, ZNF571	254	1504	16792	1.45056
GOTERM_MF_DIRECT	GO:0017075~syntaxin-1 binding	3	1.06762	0.0294448	SYBU, VAMP2, DAPK1	255	18	16881	11.0333
GOTERM_BP_DIRECT	GO:0045976~negative regulation of mitotic cell cycle, embryonic	2	0.711744	0.0299073	FZD3, CTNNB1	254	2	16792	66.1102
GOTERM_BP_DIRECT	GO:0006461~protein complex assembly	6	2.13523	0.0310759	PPP2R1A, DARS, DLG4, VAMP2, HMGA1, SLC9A3R2	254	116	16792	3.41949
GOTERM_MF_DIRECT	GO:0098641~cadherin binding involved in cell-cell adhesion	10	3.55872	0.0318285	STX5, BSG, CNN3, ARFIP2, RAB11B, RANGAP1, YWHAE, SLC9A3R2, CTNNB1, TES	255	290	16881	2.28276
GOTERM_BP_DIRECT	GO:0032729~positive regulation of interferon-gamma production	4	1.42349	0.0318973	TNF, TNFSF4, PDE4B, IL1B	254	46	16792	5.74872
GOTERM_BP_DIRECT	GO:0001558~regulation of cell growth	5	1.77936	0.0326753	SGK1, H2AFY2, NANOS1, RAB33B, IL17RB	254	80	16792	4.13189
GOTERM_BP_DIRECT	GO:0007264~small GTPase mediated signal transduction	9	3.20285	0.0329168	RAB8A, ARHGAP32, ABR, ARL15, ARFIP2, RAB11B, RAB12, VAV1, RAB33B	254	246	16792	2.41867
GOTERM_MF_DIRECT	GO:0003682~chromatin binding	12	4.27046	0.0350114	NONO, JDP2, FLI1, EP300, CENPB, GABPA, CREB3L1, SKI, NAP1L2, HMGA1, CALCOCO1, KLHDC3	255	391	16881	2.03171
GOTERM_BP_DIRECT	GO:0051897~positive regulation of protein kinase B signaling	5	1.77936	0.0380764	TNF, PDGFA, C1QTNF1, AXL, CPNE1	254	84	16792	3.93513
GOTERM_CC_DIRECT	GO:0005720~nuclear heterochromatin	3	1.06762	0.0393734	CBX3, FOXC1, SIRT1	263	22	18224	9.44901
GOTERM_BP_DIRECT	GO:0010506~regulation of autophagy	4	1.42349	0.0394351	EP300, USP10, VMP1, DAPK1	254	50	16792	5.28882
GOTERM_CC_DIRECT	GO:0030424~axon	8	2.84698	0.0421887	SYT4, KCNA4, SACS, FZD3, PALLD, KIF21B, YWHAE, UHMK1	263	222	18224	2.49704
GOTERM_MF_DIRECT	GO:0035257~nuclear hormone receptor binding	3	1.06762	0.0427493	EP300, SIRT1, CTNNB1	255	22	16881	9.02727
GOTERM_MF_DIRECT	GO:0004683~calmodulin-dependent protein kinase activity	3	1.06762	0.0427493	MKNK2, MAPKAPK2, DAPK1	255	22	16881	9.02727
GOTERM_CC_DIRECT	GO:0005634~nucleus	92	32.7402	0.0439281	JDP2, BACH2, IL16, E2F5, CBX3, ANKRD1, NAP1L2, RNGTT, YBX2, CTNNB1, NONO, GPC4, KIF2C, ZNF304, USP18, FLI1, LTF, CREB3L1, USP10, ZNF490, ERRFI1, ZNF281, ZNF546, PPP2R1A, EGR3, SGK1, POLI, STRN3, GABPA, SKP2, MBNL2, ZNF793, PALLD, SLC9A3R2, HMGA1, PKIA, JMY, NUCB1, EYA4, EP300, DACT1, HIPK1, PARP14, ZNF785, FOXC1, PRDM1, AMFR, RALYL, ZNF516, NR3C2, MKNK2, TRIB3, OAS2, MAPKAPK2, TSPYL4, UHMK1, CALC…	263	5415	18224	1.17727
GOTERM_BP_DIRECT	GO:0060559~positive regulation of calcidiol 1-monooxygenase activity	2	0.711744	0.0445251	TNF, IL1B	254	3	16792	44.0735
GOTERM_BP_DIRECT	GO:0007165~signal transduction	26	9.25267	0.0454308	ZNF516, CCL2, NR3C2, CDC42SE1, RANGAP1, CXCL6, CALCOCO1, EDNRA, PDE4B, DLG4, IL1B, TRIP10, APLN, TNFSF4, ABR, TRHDE, MET, AXL, APPL2, DAPK1, CD83, ARHGAP32, IGF2R, AMFR, PLAU, VLDLR	254	1161	16792	1.4805
GOTERM_BP_DIRECT	GO:0001666~response to hypoxia	7	2.4911	0.0455566	EDNRA, CCL2, EP300, APOLD1, ITGA2, PLAU, DDIT4	254	172	16792	2.69053
GOTERM_BP_DIRECT	GO:0032967~positive regulation of collagen biosynthetic process	3	1.06762	0.0464775	CCL2, CREB3L1, ITGA2	254	23	16792	8.62307
GOTERM_BP_DIRECT	GO:0016239~positive regulation of macroautophagy	3	1.06762	0.0464775	BNIP3L, RAB12, SIRT1	254	23	16792	8.62307
GOTERM_BP_DIRECT	GO:0030036~actin cytoskeleton organization	6	2.13523	0.0469822	PDPK1, ABR, PDGFA, ARFIP2, TRIP10, PALLD	254	130	16792	3.05124
GOTERM_CC_DIRECT	GO:0045202~synapse	7	2.4911	0.0470378	DACT1, CCL2, ITGA5, NLGN4X, DLG4, RGS17, VAMP2	263	181	18224	2.67983
GOTERM_CC_DIRECT	GO:0000139~Golgi membrane	15	5.33808	0.0482894	STX5, BSG, RAB8A, QPCTL, PDGFA, MAP4K2, RAB33B, SLC35A4, ARHGAP32, CHPF, STX16, SYBU, RAB12, TRAPPC1, PMEPA1	263	591	18224	1.7587
GOTERM_CC_DIRECT	GO:0000775~chromosome, centromeric region	4	1.42349	0.0487199	PPP2R1A, KIF2C, CENPB, CBX3	263	57	18224	4.86265
GOTERM_BP_DIRECT	GO:0034341~response to interferon-gamma	3	1.06762	0.0502106	KYNU, CYP27B1, TRIM21	254	24	16792	8.26378
GOTERM_BP_DIRECT	GO:0060071~Wnt signaling pathway, planar cell polarity pathway	5	1.77936	0.0503235	GPC4, FZD3, CELSR2, PSMB9, AP2M1	254	92	16792	3.59295
GOTERM_CC_DIRECT	GO:0016605~PML body	5	1.77936	0.0529344	HIPK1, MKNK2, SKI, CHEK2, SIRT1	263	98	18224	3.53535
GOTERM_BP_DIRECT	GO:0098609~cell-cell adhesion	9	3.20285	0.0531867	STX5, BSG, CNN3, ARFIP2, RAB11B, RANGAP1, YWHAE, SLC9A3R2, TES	254	271	16792	2.19554
GOTERM_BP_DIRECT	GO:0006959~humoral immune response	4	1.42349	0.0545828	CD83, TNF, CCL2, LTF	254	57	16792	4.63931
GOTERM_CC_DIRECT	GO:0035985~senescence-associated heterochromatin focus	2	0.711744	0.0562828	CBX3, HMGA1	263	4	18224	34.6464
GOTERM_BP_DIRECT	GO:0001501~skeletal system development	6	2.13523	0.0564568	BMP3, NOG, CLEC3A, FGFRL1, RASSF2, FOXC1	254	137	16792	2.89534
GOTERM_MF_DIRECT	GO:0005544~calcium-dependent phospholipid binding	4	1.42349	0.0567615	SYT4, ANXA10, CPNE1, SYT16	255	58	16881	4.56552
GOTERM_CC_DIRECT	GO:0005719~nuclear euchromatin	3	1.06762	0.0571067	CBX3, SIRT1, CTNNB1	263	27	18224	7.6992
GOTERM_MF_DIRECT	GO:0008022~protein C-terminus binding	7	2.4911	0.0572381	EP300, DLG4, SIRT1, SLC9A3R2, DNM1, CALCOCO1, CTNNB1	255	182	16881	2.54615
GOTERM_BP_DIRECT	GO:1902916~positive regulation of protein polyubiquitination	2	0.711744	0.0589235	HAMP, SKP2	254	4	16792	33.0551
GOTERM_BP_DIRECT	GO:0043372~positive regulation of CD4-positive, alpha-beta T cell differentiation	2	0.711744	0.0589235	CD83, TNFSF4	254	4	16792	33.0551
GOTERM_BP_DIRECT	GO:0030730~sequestering of triglyceride	2	0.711744	0.0589235	TNF, IL1B	254	4	16792	33.0551
GOTERM_BP_DIRECT	GO:0061041~regulation of wound healing	2	0.711744	0.0589235	SRSF6, PLAU	254	4	16792	33.0551
GOTERM_BP_DIRECT	GO:0071442~positive regulation of histone H3-K14 acetylation	2	0.711744	0.0589235	NAP1L2, WBP2	254	4	16792	33.0551
GOTERM_BP_DIRECT	GO:0071407~cellular response to organic cyclic compound	4	1.42349	0.0593522	TNF, CCL2, IL1B, ANKRD1	254	59	16792	4.48205
GOTERM_CC_DIRECT	GO:0005737~cytoplasm	88	31.3167	0.0594033	LZTS3, KYNU, BACH2, IL16, E2F5, RANGAP1, ANKRD1, PSPH, YBX2, IL17RB, CTNNB1, FAHD1, PDPK1, GSTM4, ANKRD12, DLG4, LTF, USP10, ERRFI1, SGK1, DARS, STRN3, SKP2, PNPLA2, MBNL2, PALLD, PKIA, DDIT4, KLHDC3, JMY, DAPK1, ACVR2A, EYA4, DACT1, EP300, SGCG, HIPK1, IGF2R, PARP14, FOXC1, PRDM1, TGFB1I1, CASQ2, CNN3, NANOS1, MKNK2, CDC42SE1, OAS2, MAPKAPK2, NHS, CALCOCO1, MLF2, NXT2, HNRNPL, AKT1S1, CYP27B1, S…	263	5222	18224	1.16771
GOTERM_MF_DIRECT	GO:0005518~collagen binding	4	1.42349	0.061612	CTSK, PDGFA, C1QTNF1, ITGA2	255	60	16881	4.41333
GOTERM_BP_DIRECT	GO:0048661~positive regulation of smooth muscle cell proliferation	4	1.42349	0.0618081	TNF, S1PR1, SKP2, ITGA2	254	60	16792	4.40735
GOTERM_BP_DIRECT	GO:0002224~toll-like receptor signaling pathway	3	1.06762	0.0620181	CTSK, MAPKAPK2, CD180	254	27	16792	7.34558
GOTERM_BP_DIRECT	GO:0032007~negative regulation of TOR signaling	3	1.06762	0.0661438	AKT1S1, SIRT1, DDIT4	254	28	16792	7.08324
GOTERM_BP_DIRECT	GO:0007420~brain development	7	2.4911	0.0670956	ABR, S1PR1, SYT4, H2AFY2, FOXC1, PCDH19, DDIT4	254	190	16792	2.43564
GOTERM_CC_DIRECT	GO:0030054~cell junction	12	4.27046	0.0684763	LZTS3, ARHGAP32, DACT1, SYT4, NLGN4X, DLG4, RAB11B, RGS17, VAMP2, HOMER2, CTNNB1, TES	263	459	18224	1.81158
GOTERM_BP_DIRECT	GO:0050766~positive regulation of phagocytosis	3	1.06762	0.0703583	TNF, ABR, IL1B	254	29	16792	6.83899
GOTERM_BP_DIRECT	GO:0031622~positive regulation of fever generation	2	0.711744	0.0731058	TNF, IL1B	254	5	16792	26.4441
GOTERM_BP_DIRECT	GO:0014910~regulation of smooth muscle cell migration	2	0.711744	0.0731058	PDGFA, PLAU	254	5	16792	26.4441
GOTERM_MF_DIRECT	GO:0001948~glycoprotein binding	4	1.42349	0.0745446	FBXO17, IGF2R, EDEM1, VLDLR	255	65	16881	4.07385
GOTERM_BP_DIRECT	GO:0048706~embryonic skeletal system development	3	1.06762	0.0746579	ACVR2A, NOG, PCSK5	254	30	16792	6.61102
GOTERM_CC_DIRECT	GO:0043234~protein complex	11	3.91459	0.074691	AKT1S1, SET, STRN3, RASSF2, LTF, SKI, ERLIN1, USP10, AMFR, CTNNB1, TES	263	412	18224	1.85005
GOTERM_BP_DIRECT	GO:0046330~positive regulation of JNK cascade	4	1.42349	0.0747769	TNF, RASSF2, MAP4K2, IL1B	254	65	16792	4.06832
GOTERM_CC_DIRECT	GO:0005615~extracellular space	27	9.60854	0.0765782	NOG, PXDN, CCL2, TNF, SERPINA10, IL16, PDGFA, CXCL6, GPC4, HAMP, C1QTNF1, LTF, IL1B, PCSK5, APLN, BMP3, TNFSF4, AXL, IL25, NUCB1, CTSK, IGF2R, NLGN4X, WNT9A, PLA2G3, PATE2, PLAU	263	1347	18224	1.38894
GOTERM_BP_DIRECT	GO:0030593~neutrophil chemotaxis	4	1.42349	0.0775045	CCL2, PDE4B, IL1B, VAV1	254	66	16792	4.00668
GOTERM_BP_DIRECT	GO:0008285~negative regulation of cell proliferation	11	3.91459	0.0775631	IFIT3, CYP27B1, KLF13, FGFRL1, IL1B, SKI, TGFB1I1, WNT9A, HMGA1, CTNNB1, TES	254	396	16792	1.8364
GOTERM_CC_DIRECT	GO:0005829~cytosol	58	20.6406	0.0791264	KYNU, IL16, NBEA, RANGAP1, ANKRD1, PSPH, CTNNB1, FAHD1, KIF2C, USP18, PDPK1, GSTM4, PDE4B, IL1B, ERRFI1, PPP2R1A, STX5, SGK1, DARS, CHAC1, SKP2, PNPLA2, HMGA1, DDIT4, KLHDC3, ATP6V1A, ARHGAP32, DACT1, CHPF, VAMP2, TRAPPC1, HK2, PPP3R1, TRIB3, MAPKAPK2, OAS2, TK1, DGKA, AKT1S1, SET, STX16, ABCD3, TRIP10, AP2M1, RAB8A, ABR, ARFIP2, YWHAE, VAV1, CAMK2N2, POLR3E, TRIM21, PSMB9, IFIT3, IRF9, BNIP3L, C…	263	3315	18224	1.21236
GOTERM_MF_DIRECT	GO:0002039~p53 binding	4	1.42349	0.0800281	EP300, USP10, ANKRD1, SIRT1	255	67	16881	3.95224
GOTERM_CC_DIRECT	GO:0005887~integral component of plasma membrane	28	9.96441	0.0801578	TNF, TRPV2, KCNA4, IL17RB, EDNRA, GPC4, LY6E, FAT1, C1QTNF1, SLC4A2, DCLK1, BSG, TRHDE, TNFSF4, MET, CD1C, AXL, PCDHB2, CD180, NCSTN, ATP6V1A, CD83, ACVR2A, SLC6A9, RHCG, IGF2R, NLGN4X, VAMP2	263	1415	18224	1.37116
GOTERM_BP_DIRECT	GO:0016192~vesicle-mediated transport	6	2.13523	0.0801881	STX5, STX16, CPNE1, VAMP2, TRIP10, AP2M1	254	152	16792	2.60961
GOTERM_BP_DIRECT	GO:0008203~cholesterol metabolic process	4	1.42349	0.0830887	TNFSF4, CYP11B2, ERLIN1, VLDLR	254	68	16792	3.88884
GOTERM_BP_DIRECT	GO:0031663~lipopolysaccharide-mediated signaling pathway	3	1.06762	0.0834987	TNF, CCL2, IL1B	254	32	16792	6.19783
GOTERM_BP_DIRECT	GO:0061024~membrane organization	3	1.06762	0.0834987	RAB8A, SGCG, YWHAE	254	32	16792	6.19783
GOTERM_BP_DIRECT	GO:0035556~intracellular signal transduction	11	3.91459	0.0850118	DGKA, SGK1, TULP4, PDPK1, ABR, MKNK2, MAP4K2, ASB5, YWHAE, DCLK1, DAPK1	254	403	16792	1.8045
GOTERM_BP_DIRECT	GO:0043547~positive regulation of GTPase activity	14	4.98221	0.0867454	CCL2, ABR, PDGFA, RAB3IL1, RANGAP1, RGS17, VAV1, ARHGAP32, S1PR1, DLG4, RGSL1, TRAPPC1, TRIP10, ERRFI1	254	565	16792	1.63813
GOTERM_BP_DIRECT	GO:0032680~regulation of tumor necrosis factor production	2	0.711744	0.0870752	LTF, MAPKAPK2	254	6	16792	22.0367
GOTERM_CC_DIRECT	GO:0009897~external side of plasma membrane	7	2.4911	0.0876465	GPC4, CD83, TNF, S1PR1, ITGA5, ITGA2, ANTXR2	263	213	18224	2.27723
GOTERM_MF_DIRECT	GO:0000978~RNA polymerase II core promoter proximal region sequence-specific DNA binding	10	3.55872	0.0884781	ZNF281, JDP2, FLI1, KLF13, ZNF708, GABPA, ETV1, SKI, PRDM1, NEUROD6	255	355	16881	1.86479
GOTERM_BP_DIRECT	GO:0007267~cell-cell signaling	8	2.84698	0.0896705	BMP3, TRHDE, PDGFA, FAT1, IL1B, CXCL6, WNT9A, PCSK5	254	254	16792	2.08221
GOTERM_CC_DIRECT	GO:0030018~Z disc	5	1.77936	0.0906083	PDE4B, NEXN, PALLD, CASQ2, CTNNB1	263	118	18224	2.93613
GOTERM_CC_DIRECT	GO:0030141~secretory granule	4	1.42349	0.0907083	LTF, IL1B, VAMP2, PCSK5	263	74	18224	3.74556
GOTERM_BP_DIRECT	GO:0007156~homophilic cell adhesion via plasma membrane adhesion molecules	6	2.13523	0.0909654	PCDHB5, FAT4, FAT1, PCDHB2, CELSR2, PCDH19	254	158	16792	2.51052
GOTERM_MF_DIRECT	GO:0044325~ion channel binding	5	1.77936	0.0910891	PDE4B, USP10, YWHAE, CTNNB1, AP2M1	255	113	16881	2.9292
GOTERM_MF_DIRECT	GO:0008201~heparin binding	6	2.13523	0.0943177	ELSPBP1, SERPINA10, CCL2, FGFRL1, LTF, CXCL6	255	160	16881	2.4825
GOTERM_MF_DIRECT	GO:0019904~protein domain specific binding	7	2.4911	0.0949599	PPP3R1, ARFIP2, CBX3, IL1B, SKI, HOMER2, YWHAE	255	208	16881	2.22788
GOTERM_BP_DIRECT	GO:0007219~Notch signaling pathway	5	1.77936	0.0959824	NCSTN, EP300, FAT4, CHAC1, FOXC1	254	115	16792	2.87436
GOTERM_BP_DIRECT	GO:0050729~positive regulation of inflammatory response	4	1.42349	0.0977712	CCL2, TNFSF4, ITGA2, IL17RB	254	73	16792	3.62248
