# Supplementary material for: lncRNA MALAT1 mediates osteogenic differentiation of bone mesenchymal stem cells by sponging miR-129-5p
Source: PeerJ. 2022 Apr 22;10:e13355. doi: 10.7717/peerj.13355 (PMC9037136; doi:10.7717/peerj.13355)
Supplement: Supplemental Information 9 [file peerj-10-13355-s009.xlsx]

## Sheet: KEGG(用ID做)
Category	Term	Count	%	PValue	Genes	List Total	Pop Hits	Pop Total	Fold Enrichment
KEGG_PATHWAY	hsa04350:TGF-beta signaling pathway	6	2.13523	0.00795006	5518, 92, 2033, 9241, 7124, 1875	103	84	6879	4.77046
KEGG_PATHWAY	hsa05205:Proteoglycans in cancer	9	3.20285	0.00941887	3673, 7483, 3678, 7124, 5170, 7976, 4233, 1499, 5328	103	200	6879	3.00539
KEGG_PATHWAY	hsa05323:Rheumatoid arthritis	6	2.13523	0.0096317	1513, 523, 6372, 7124, 6347, 3553	103	88	6879	4.55362
KEGG_PATHWAY	hsa04152:AMPK signaling pathway	7	2.4911	0.00964245	90993, 4218, 9230, 5518, 84335, 5170, 23411	103	123	6879	3.80085
KEGG_PATHWAY	hsa04068:FoxO signaling pathway	7	2.4911	0.0143069	9455, 2033, 6446, 5170, 1901, 6502, 23411	103	134	6879	3.48884
KEGG_PATHWAY	hsa05168:Herpes simplex infection	8	2.84698	0.0186054	6431, 4939, 2033, 7124, 6347, 3553, 10379, 6502	103	183	6879	2.91962
KEGG_PATHWAY	hsa04960:Aldosterone-regulated sodium reabsorption	4	1.42349	0.0196602	4306, 6446, 5170, 9351	103	39	6879	6.84989
KEGG_PATHWAY	hsa04060:Cytokine-cytokine receptor interaction	9	3.20285	0.0273334	55540, 92, 7292, 6372, 7124, 6347, 3553, 64806, 57007	103	243	6879	2.47357
KEGG_PATHWAY	hsa05144:Malaria	4	1.42349	0.0356597	7124, 6347, 3553, 4233	103	49	6879	5.45195
KEGG_PATHWAY	hsa04640:Hematopoietic cell lineage	5	1.77936	0.0397875	3673, 3678, 7124, 3553, 911	103	87	6879	3.8383
KEGG_PATHWAY	hsa05215:Prostate cancer	5	1.77936	0.0412234	90993, 5154, 2033, 5170, 1499	103	88	6879	3.79468
KEGG_PATHWAY	hsa05164:Influenza A	7	2.4911	0.044073	4939, 55916, 2033, 7124, 6347, 3553, 10379	103	174	6879	2.68681
KEGG_PATHWAY	hsa04310:Wnt signaling pathway	6	2.13523	0.0536853	7483, 2239, 2033, 7976, 5534, 1499	103	138	6879	2.90376
KEGG_PATHWAY	hsa04150:mTOR signaling pathway	4	1.42349	0.0543395	84335, 7124, 5170, 54541	103	58	6879	4.60596
KEGG_PATHWAY	hsa04916:Melanogenesis	5	1.77936	0.0607279	90993, 7483, 2033, 7976, 1499	103	100	6879	3.33932
KEGG_PATHWAY	hsa04721:Synaptic vesicle cycle	4	1.42349	0.0663773	523, 6844, 1759, 1173	103	63	6879	4.24041
KEGG_PATHWAY	hsa04151:PI3K-Akt signaling pathway	10	3.55872	0.0692472	90993, 3673, 5154, 5518, 3678, 6446, 5170, 7531, 54541, 4233	103	345	6879	1.93584
KEGG_PATHWAY	hsa04390:Hippo signaling pathway	6	2.13523	0.0731242	7483, 1742, 5518, 7976, 7531, 1499	103	151	6879	2.65376
KEGG_PATHWAY	hsa05412:Arrhythmogenic right ventricular cardiomyopathy (ARVC)	4	1.42349	0.0768103	6445, 3673, 3678, 1499	103	67	6879	3.98725
KEGG_PATHWAY	hsa05166:HTLV-I infection	8	2.84698	0.0823713	11200, 5154, 7483, 2033, 7124, 7976, 5534, 1499	103	254	6879	2.10351
KEGG_PATHWAY	hsa05203:Viral carcinogenesis	7	2.4911	0.0833738	90993, 2033, 9261, 7531, 10379, 6502, 1960	103	205	6879	2.28051
KEGG_PATHWAY	hsa04510:Focal adhesion	7	2.4911	0.0848897	3673, 5154, 3678, 7409, 5170, 4233, 1499	103	206	6879	2.26944
KEGG_PATHWAY	hsa04130:SNARE interactions in vesicular transport	3	1.06762	0.089935	6811, 8675, 6844	103	34	6879	5.89292
KEGG_PATHWAY	hsa05133:Pertussis	4	1.42349	0.0996629	6372, 3678, 7124, 3553	103	75	6879	3.56194
