# Supplementary material for: lncRNA MALAT1 mediates osteogenic differentiation of bone mesenchymal stem cells by sponging miR-129-5p
Source: PeerJ. 2022 Apr 22;10:e13355. doi: 10.7717/peerj.13355 (PMC9037136; doi:10.7717/peerj.13355)
Supplement: Supplemental Information 10 [file peerj-10-13355-s010.xlsx]

## Sheet: Sheet1
gene	sample	relative expression
miR-129-5p	6weeks	1.07923
miR-129-5p	6weeks	0.965936
miR-129-5p	6weeks	0.954836
miR-129-5p	12months	0.692555
miR-129-5p	12months	0.773782
miR-129-5p	12months	0.784584
miR-17-5p	6weeks	0.986233
miR-17-5p	6weeks	1.01377
miR-17-5p	12months	0.438303
miR-17-5p	12months	0.484584
miR-17-5p	12months	0.400535
miR-20b-5p	6weeks	1.02811
miR-20b-5p	6weeks	0.971886
miR-20b-5p	12months	6.6807
miR-20b-5p	12months	6.96441
miR-24-3p	6weeks	0.840896
miR-24-3p	6weeks	1.1591
miR-24-3p	12months	6.72717
miR-24-3p	12months	6.40856
miR-24-3p	12months	5.42642
miR-125b-5p	6weeks	0.955945
miR-125b-5p	6weeks	1.04405
miR-125b-5p	12months	14.3701
miR-125b-5p	12months	12.6845
miR-125b-5p	12months	14.5707
miR-125a-5p	6weeks	1.03168
miR-125a-5p	6weeks	0.968317
miR-125a-5p	12months	11.353
miR-125a-5p	12months	11.8351
Malat1	6weeks	0.920188
Malat1	6weeks	0.721965
Malat1	6weeks	1.35785
Malat1	12months	2.07053
Malat1	12months	2.23457
Malat1	12months	3.11666
