# Supplementary material for: lncRNA MALAT1 mediates osteogenic differentiation of bone mesenchymal stem cells by sponging miR-129-5p
Source: PeerJ. 2022 Apr 22;10:e13355. doi: 10.7717/peerj.13355 (PMC9037136; doi:10.7717/peerj.13355)
Supplement: Supplemental Information 11 [file peerj-10-13355-s011.xlsx]

## Sheet: Sheet1
sample	BMD(mg/cc)
6week	101.5
6week	112.1
12month	50.6
12month	42.5
12month	49.8
sample	BV/TV(%)
6week	18.1947
6week	22.2916
6week	24.491
12month	5.4796
12month	4.3999
12month	4.1609
