# Supplementary material for: lncRNA MALAT1 mediates osteogenic differentiation of bone mesenchymal stem cells by sponging miR-129-5p
Source: PeerJ. 2022 Apr 22;10:e13355. doi: 10.7717/peerj.13355 (PMC9037136; doi:10.7717/peerj.13355)
Supplement: Supplemental Information 12 [file peerj-10-13355-s012.xlsx]

## Sheet: Sheet1
gene	sample	relative expression
Gapdh	total	1.07503
Gapdh	total	0.994214
Gapdh	total	0.930757
Gapdh	cytoplasm	0.861751
Gapdh	cytoplasm	0.839784
Gapdh	cytoplasm	0.836966
Gapdh	nucleus	0.138249
Gapdh	nucleus	0.160216
Gapdh	nucleus	0.163034
U6	total	1.02606
U6	total	0.974984
U6	total	0.99896
U6	cytoplasm	0.174704
U6	cytoplasm	0.166852
U6	cytoplasm	0.169763
U6	nucleus	0.825296
U6	nucleus	0.833148
U6	nucleus	0.830237
Malat1	total	1.00682
Malat1	total	0.972405
Malat1	total	1.02077
Malat1	cytoplasm	0.001697
Malat1	cytoplasm	0.001573
Malat1	cytoplasm	0.001595
Malat1	nucleus	0.998303
Malat1	nucleus	0.998427
Malat1	nucleus	0.998405
