# Supplementary material for: lncRNA MALAT1 mediates osteogenic differentiation of bone mesenchymal stem cells by sponging miR-129-5p
Source: PeerJ. 2022 Apr 22;10:e13355. doi: 10.7717/peerj.13355 (PMC9037136; doi:10.7717/peerj.13355)
Supplement: Supplemental Information 13 [file peerj-10-13355-s013.xlsx]

## Sheet: Sheet1
gene	sample	relative expression
ALP	0day	0.874583
ALP	0day	0.983957
ALP	0day	1.14146
ALP	3day	10.315
ALP	3day	11.7669
ALP	3day	13.9933
ALP	7day	28.9736
ALP	7day	24.1955
ALP	7day	32.3718
ALP	14day	16.7567
ALP	14day	19.1154
ALP	14day	12.7875
ALP	21day	10.5317
ALP	21day	11.7669
ALP	21day	13.4233
OCN	0day	0.920188
OCN	0day	1.18921
OCN	0day	0.890605
OCN	3day	1.39797
OCN	3day	1.49831
OCN	3day	1.30435
OCN	7day	2.05623
OCN	7day	2.47941
OCN	7day	2.31338
OCN	14day	2.47369
OCN	14day	2.19872
OCN	14day	2.50822
OCN	21day	2.71949
OCN	21day	3.41843
OCN	21day	2.62685
MALAT1	0day	1.12506
MALAT1	0day	1.03527
MALAT1	0day	0.839677
MALAT1	3day	2.43401
MALAT1	3day	1.70921
MALAT1	3day	1.52979
MALAT1	7day	3.70635
MALAT1	7day	3.605
MALAT1	7day	3.13834
MALAT1	14day	4.91321
MALAT1	14day	4.07462
MALAT1	14day	4.8121
MALAT1	21day	5.66994
MALAT1	21day	5.78908
MALAT1	21day	4.801
RUNX2	0day	1.04833
RUNX2	0day	1.01669
RUNX2	0day	0.934981
RUNX2	3day	1.21139
RUNX2	3day	1.15402
RUNX2	3day	1.28239
RUNX2	7day	1.6012
RUNX2	7day	1.78592
RUNX2	7day	1.63673
RUNX2	14day	1.92562
RUNX2	14day	2.04605
RUNX2	14day	1.83386
RUNX2	21day	2.02342
RUNX2	21day	1.9345
RUNX2	21day	1.79955
