# Supplementary material for: lncRNA MALAT1 mediates osteogenic differentiation of bone mesenchymal stem cells by sponging miR-129-5p
Source: PeerJ. 2022 Apr 22;10:e13355. doi: 10.7717/peerj.13355 (PMC9037136; doi:10.7717/peerj.13355)
Supplement: Supplemental Information 14 [file peerj-10-13355-s014.xlsx]

## Sheet: Sheet1
gene	sample	relative expression
ALP	Blank	0.948246
ALP	Blank	0.988514
ALP	Blank	1.06324
ALP	NC	0.888669
ALP	NC	0.974327
ALP	NC	1.14438
ALP	ASO	0.044759
ALP	ASO	0.016961
MALAT1	Blank	0.929134
MALAT1	Blank	1.01674
MALAT1	Blank	1.05413
MALAT1	NC	0.842842
MALAT1	NC	1.16079
MALAT1	NC	1.20246
MALAT1	ASO	0.026491
MALAT1	ASO	0.146774
MALAT1	ASO	0.15195
MiR-129-5p	Blank	1.07674
MiR-129-5p	Blank	1.16148
MiR-129-5p	Blank	0.761787
MiR-129-5p	NC	1.04729
MiR-129-5p	NC	1.26254
MiR-129-5p	NC	1.17827
MiR-129-5p	ASO	2.92141
MiR-129-5p	ASO	3.38385
MiR-129-5p	ASO	3.49833
OCN	Blank	0.958231
OCN	Blank	0.901914
OCN	Blank	1.13986
OCN	NC	1.12749
OCN	NC	1.19832
OCN	NC	1.144
OCN	ASO	0.451146
OCN	ASO	0.616284
OCN	ASO	0.454284
OPN	Blank	1.05215
OPN	Blank	0.961483
OPN	Blank	0.986372
OPN	NC	0.788303
OPN	NC	0.861966
OPN	NC	0.831041
OPN	ASO	2.34296
OPN	ASO	2.01159
RUNX2	Blank	0.874583
RUNX2	Blank	1.05458
RUNX2	Blank	1.07084
RUNX2	NC	0.819565
RUNX2	NC	0.747058
RUNX2	NC	1.13024
RUNX2	ASO	0.247795
RUNX2	ASO	0.368993
RUNX2	ASO	0.460517
STAT1	Blank	0.921965
STAT1	Blank	1.10957
STAT1	Blank	0.968466
STAT1	NC	1.04033
STAT1	NC	1.05336
STAT1	NC	1.01748
STAT1	ASO	0.859178
STAT1	ASO	0.692153
STAT1	ASO	0.62643
