# Supplementary material for: lncRNA MALAT1 mediates osteogenic differentiation of bone mesenchymal stem cells by sponging miR-129-5p
Source: PeerJ. 2022 Apr 22;10:e13355. doi: 10.7717/peerj.13355 (PMC9037136; doi:10.7717/peerj.13355)
Supplement: Supplemental Information 15 [file peerj-10-13355-s015.xlsx]

## Sheet: Sheet1
sample	AKP activity
GM	33.3982
GM	32.0238
GM+ASO	16.4909
GM+ASO	17.8545
GM+ASO	18.6827
OM	123.546
OM	133.094
OM	122.668
OM+ASO	22.2946
OM+ASO	25.9891
OM+ASO	22.0806
