# Supplementary material for: lncRNA MALAT1 mediates osteogenic differentiation of bone mesenchymal stem cells by sponging miR-129-5p
Source: PeerJ. 2022 Apr 22;10:e13355. doi: 10.7717/peerj.13355 (PMC9037136; doi:10.7717/peerj.13355)
Supplement: Supplemental Information 16 [file peerj-10-13355-s016.xlsx]

## Sheet: Sheet1
gene	sample	relative expression
MiR-129-5p	Blank	0.936056
MiR-129-5p	Blank	0.996311
MiR-129-5p	Blank	1.06763
MiR-129-5p	NC	0.832007
MiR-129-5p	NC	0.975807
MiR-129-5p	Inhibitor	1.33299
MiR-129-5p	Inhibitor	1.17663
MiR-129-5p	Inhibitor	1.34226
MiR-129-5p	Inhibitor	1.38
MiR-129-5p	Inhibitor	1.31464
MiR-129-5p	Inhibitor	1.66401
ALP	Blank	1.27162
ALP	Blank	0.918656
ALP	Blank	0.809725
ALP	NC	1.15402
ALP	NC	0.988218
ALP	NC	1.38191
ALP	Inhibitor	2.17637
ALP	Inhibitor	2.1776
ALP	Inhibitor	2.21267
MALAT1	Blank	0.988514
MALAT1	Blank	0.825496
MALAT1	Blank	1.18599
MALAT1	NC	0.675175
MALAT1	NC	0.73884
MALAT1	NC	1.2086
MALAT1	Inhibitor	0.270431
MALAT1	Inhibitor	0.120185
MALAT1	Inhibitor	0.132433
OCN	Blank	1.14605
OCN	Blank	0.950439
OCN	Blank	0.903513
OCN	NC	1.23333
OCN	NC	1.11085
OCN	NC	1.22741
OCN	Inhibitor	1.78592
OCN	Inhibitor	1.60956
OPN	Blank	1.05066
OPN	Blank	0.949342
OPN	NC	0.72951
OPN	NC	0.639493
OPN	Inhibitor	11.5115
OPN	Inhibitor	9.28563
OPN	Inhibitor	10.3031
RUNX2	Blank	1.13813
RUNX2	Blank	0.997692
RUNX2	Blank	0.864177
RUNX2	NC	1.0693
RUNX2	NC	1.11471
RUNX2	Inhibitor	1.66632
RUNX2	Inhibitor	1.61982
RUNX2	Inhibitor	1.61646
STAT1	Blank	0.915945
STAT1	Blank	0.992097
STAT1	Blank	1.09196
STAT1	NC	1.1355
STAT1	NC	1.17555
STAT1	Inhibitor	1.38779
STAT1	Inhibitor	1.33058
STAT1	Inhibitor	1.45167
