# Supplementary material for: lncRNA MALAT1 mediates osteogenic differentiation of bone mesenchymal stem cells by sponging miR-129-5p
Source: PeerJ. 2022 Apr 22;10:e13355. doi: 10.7717/peerj.13355 (PMC9037136; doi:10.7717/peerj.13355)
Supplement: Supplemental Information 17 [file peerj-10-13355-s017.xlsx]

## Sheet: Sheet1
gene	sample	relative expression
MiR-129-5p	ASO	2.92141
MiR-129-5p	ASO	3.38385
MiR-129-5p	ASO	3.49833
MiR-129-5p	NC	1.04729
MiR-129-5p	NC	1.26254
MiR-129-5p	NC	1.17827
MiR-129-5p	BLANK	1.07674
MiR-129-5p	BLANK	1.16148
MiR-129-5p	BLANK	0.761787
