# Supplementary material for: lncRNA MALAT1 mediates osteogenic differentiation of bone mesenchymal stem cells by sponging miR-129-5p
Source: PeerJ. 2022 Apr 22;10:e13355. doi: 10.7717/peerj.13355 (PMC9037136; doi:10.7717/peerj.13355)
Supplement: Supplemental Information 18 [file peerj-10-13355-s018.xlsx]

## Sheet: Sheet1
sample	relative luciferase activity
MALAT1-WT+miRNA NC	1.0089
MALAT1-WT+miRNA NC	0.9824
MALAT1-WT+miRNA NC	1.0087
MALAT1-WT+miR-129-5p mimic	0.5958
MALAT1-WT+miR-129-5p mimic	0.656
MALAT1-WT+miR-129-5p mimic	0.6862
MALAT1-MUT+miRNA NC	0.9043
MALAT1-MUT+miRNA NC	0.9723
MALAT1-MUT+miRNA NC	1.0686
MALAT1-MUT+miR-129-5p mimic	0.97
MALAT1-MUT+miR-129-5p mimic	1.0217
MALAT1-MUT+miR-129-5p mimic	0.9821
