# Supplementary material for: lncRNA MALAT1 mediates osteogenic differentiation of bone mesenchymal stem cells by sponging miR-129-5p
Source: PeerJ. 2022 Apr 22;10:e13355. doi: 10.7717/peerj.13355 (PMC9037136; doi:10.7717/peerj.13355)
Supplement: Supplemental Information 19 [file peerj-10-13355-s019.xlsx]

## Sheet: Sheet1
gene	sample	relative expression
Stat1	Blank	0.915945
Stat1	Blank	0.915945
Stat1	Blank	1.09196
Stat1	NC	1.1355
Stat1	NC	1.17555
Stat1	Mimic	0.387786
Stat1	Mimic	0.330579
Stat1	Mimic	0.451668
