# Supplementary material for: lncRNA MALAT1 mediates osteogenic differentiation of bone mesenchymal stem cells by sponging miR-129-5p
Source: PeerJ. 2022 Apr 22;10:e13355. doi: 10.7717/peerj.13355 (PMC9037136; doi:10.7717/peerj.13355)
Supplement: Supplemental Information 20 [file peerj-10-13355-s020.xlsx]

## Sheet: Sheet1
sample	relative luciferase activity
STAT1-WT+ miRNA NC	1.00507
STAT1-WT+ miRNA NC	1.01429
STAT1-WT+ miRNA NC	0.980639
STAT1-WT+ mmu-miR-129-5p mimic	0.860301
STAT1-WT+ mmu-miR-129-5p mimic	0.867387
STAT1-WT+ mmu-miR-129-5p mimic	0.837711
STAT1-mut+ miRNA NC	1.02214
STAT1-mut+ miRNA NC	0.993181
STAT1-mut+ miRNA NC	0.98468
STAT1-mut+ mmu-miR-129-5p mimic	0.965086
STAT1-mut+ mmu-miR-129-5p mimic	0.920384
STAT1-mut+ mmu-miR-129-5p mimic	0.919593
