# Supplementary material for: lncRNA MALAT1 mediates osteogenic differentiation of bone mesenchymal stem cells by sponging miR-129-5p
Source: PeerJ. 2022 Apr 22;10:e13355. doi: 10.7717/peerj.13355 (PMC9037136; doi:10.7717/peerj.13355)
Supplement: Supplemental Information 21 [file peerj-10-13355-s021.xlsx]

## Sheet: Sheet1
gene	sample	relative expression
ALP	Control	0.974566
ALP	Control	1.05811
ALP	Control	0.967329
ALP	ASO	0.194569
ALP	ASO	0.139549
ALP	ASO	0.156411
ALP	ASO+miR-129-5p inhibitor	1.1529
ALP	ASO+miR-129-5p inhibitor	1.27798
ALP	ASO+miR-129-5p inhibitor	1.15887
OPN	Control	1.02152
OPN	Control	0.927696
OPN	Control	1.05079
OPN	ASO	1.79839
OPN	ASO	1.86935
OPN	ASO	1.74158
OPN	ASO+miR-129-5p inhibitor	4.42716
OPN	ASO+miR-129-5p inhibitor	4.57143
OPN	ASO+miR-129-5p inhibitor	4.36059
OCN	Control	0.979569
OCN	Control	1.004
OCN	Control	1.01643
OCN	ASO	0.582124
OCN	ASO	0.34351
OCN	ASO	0.429315
OCN	ASO+miR-129-5p inhibitor	0.993187
OCN	ASO+miR-129-5p inhibitor	1.19065
OCN	ASO+miR-129-5p inhibitor	1.15173
RUNX2	Control	0.963759
RUNX2	Control	1.052
RUNX2	Control	0.984246
RUNX2	ASO	0.33906
RUNX2	ASO	0.24904
RUNX2	ASO	0.409477
RUNX2	ASO+miR-129-5p inhibitor	1.4894
RUNX2	ASO+miR-129-5p inhibitor	1.53461
RUNX2	ASO+miR-129-5p inhibitor	1.6894
