# Supplementary material for: lncRNA MALAT1 mediates osteogenic differentiation of bone mesenchymal stem cells by sponging miR-129-5p
Source: PeerJ. 2022 Apr 22;10:e13355. doi: 10.7717/peerj.13355 (PMC9037136; doi:10.7717/peerj.13355)
Supplement: Supplemental Information 22 [file peerj-10-13355-s022.xlsx]

## Sheet: Sheet1
sample	AKP activitiy
Control	87.5892
Control	91.4216
Control	93.3627
ASO	16.9983
ASO	19.2265
ASO	18.1594
ASO+miR-129-5p inhibitor	82.074
ASO+miR-129-5p inhibitor	75.0655
ASO+miR-129-5p inhibitor	74.7825
