# Supplementary material for: lncRNA MALAT1 mediates osteogenic differentiation of bone mesenchymal stem cells by sponging miR-129-5p
Source: PeerJ. 2022 Apr 22;10:e13355. doi: 10.7717/peerj.13355 (PMC9037136; doi:10.7717/peerj.13355)
Supplement: Supplemental Information 23 [file peerj-10-13355-s023.xlsx]

## Sheet: Sheet1
gene	sample	relative expression
MALAT1	IgG	1.11987
MALAT1	IgG	1.08275
MALAT1	IgG	0.797377
MALAT1	Ago2	7.48153
MALAT1	Ago2	7.63873
MALAT1	Ago2	8.83563
MALAT1	Ago2	8.07428
miR-129-5p	IgG	0.946459
miR-129-5p	IgG	1.0872
miR-129-5p	IgG	0.966346
miR-129-5p	Ago2	6.48153
miR-129-5p	Ago2	6.63873
miR-129-5p	Ago2	7.83563
Stat1	IgG	1.17284
Stat1	IgG	1.06437
Stat1	IgG	1.00696
Stat1	IgG	0.795536
Stat1	Ago2	2.2974
Stat1	Ago2	2.63902
Stat1	Ago2	2.34567
Stat1	Ago2	2.01391
Stat1	Ago2	2.11404
Stat1	Ago2	2.26577
